# Supplementary material for: A gold-catalysed imine–propargylamine cascade sequence: synthesis of 3-substituted-2,5-dimethylpyrazines and the reaction mechanism
Source: Royal Society of Chemistry journal article supplement (doi:10.1039/c4cc01485e), 2014-01-01

## Electronic Supplementary Information

# Gold-Catalyzed Imine-Propargylamine Cascade Sequence: Synthesis of 3-Substituted-2,5-dimethylpyrazines and Reaction Mechanism

Benito Alcaide,<sup>\*,1</sup> Pedro Almendros,<sup>\*,2</sup> José M. Alonso,<sup>1</sup> Israel Fernández,<sup>3</sup> Gonzalo Gómez-Campillos,<sup>1</sup> and M. Rosario Torres<sup>4</sup>

<sup>1</sup>*Grupo de Lactamas y Heterociclos Bioactivos, Departamento de Química Orgánica I, Unidad Asociada al CSIC, Facultad de Química, Universidad Complutense de Madrid, 28040-Madrid, Spain*

<sup>2</sup>*Instituto de Química Orgánica General, IQOG-CSIC, Juan de la Cierva 3, 28006-Madrid, Spain*

<sup>3</sup>*Departamento de Química Orgánica I, Facultad de Química, Universidad Complutense de Madrid, 28040-Madrid, Spain*

<sup>4</sup>*CAI Difracción de Rayos X, Facultad de Química, Universidad Complutense de Madrid, 28040-Madrid, Spain*

E-mail: alcaideb@quim.ucm.es; Palmendros@iqog.csic.es

**General Methods:** <sup>1</sup>H NMR and <sup>13</sup>C NMR spectra were recorded on a Bruker Avance AVIII-700 with cryoprobe, Bruker AMX-500, Bruker Avance-300, Varian VRX-300S or Bruker AC-200. NMR spectra were recorded in CDCl<sub>3</sub> solutions, except otherwise stated. Chemical shifts are given in ppm relative to TMS (<sup>1</sup>H, 0.0 ppm), or CDCl<sub>3</sub> (<sup>13</sup>C, 76.9 ppm). Low and high resolution mass spectra were taken on an AGILENT 6520 Accurate-Mass QTOF LC/MS spectrometer using the electronic impact (EI) or electrospray modes (ES) unless otherwise stated. IR spectra were recorded on a Bruker Tensor 27 spectrometer. All commercially available compounds were used without further purification.

Imines **1a**, **1c** and **4a** were prepared adopting the experimental method described in: M. Concepción Fernández García, *Síntesis y estudio de derivados N-alénicos y N-acetilénicos de 2-indolilalquilaminas*

como inhibidores selectivos de las monoaminooxidasas A y B. Ph.D. Thesis, Universidad Complutense de Madrid, 1992. Imine **1i** was prepared as described in: B. Alcaide, P. Almendros, N. R. Salgado, *Tetrahedron Lett.* **2001**, 42, 1503.

Deuterated [ $D_1$ ]-propargyl amine was prepared adopting literature reports: (a) R. Cervellati, W. Caminati, C. Degli Esposti, A. M. Mirri, *Journal of Molecular Spectroscopy* **1977** 66, 389-398. (b) S. P. Bew, G. D. Hiatt-Gipson, J. A. Lovell, C. Poullain, *Organic Letters* **2012**, 14 (2) 456-459.

The deuterated indole-2-carbaldehyde precursor of imine [ $D_1$ ]-**1a** was prepared as described: L. Wang, X. Xie, Y. Liu, *Angew. Chem. Int. Ed.* **2013**, 52, 13302.

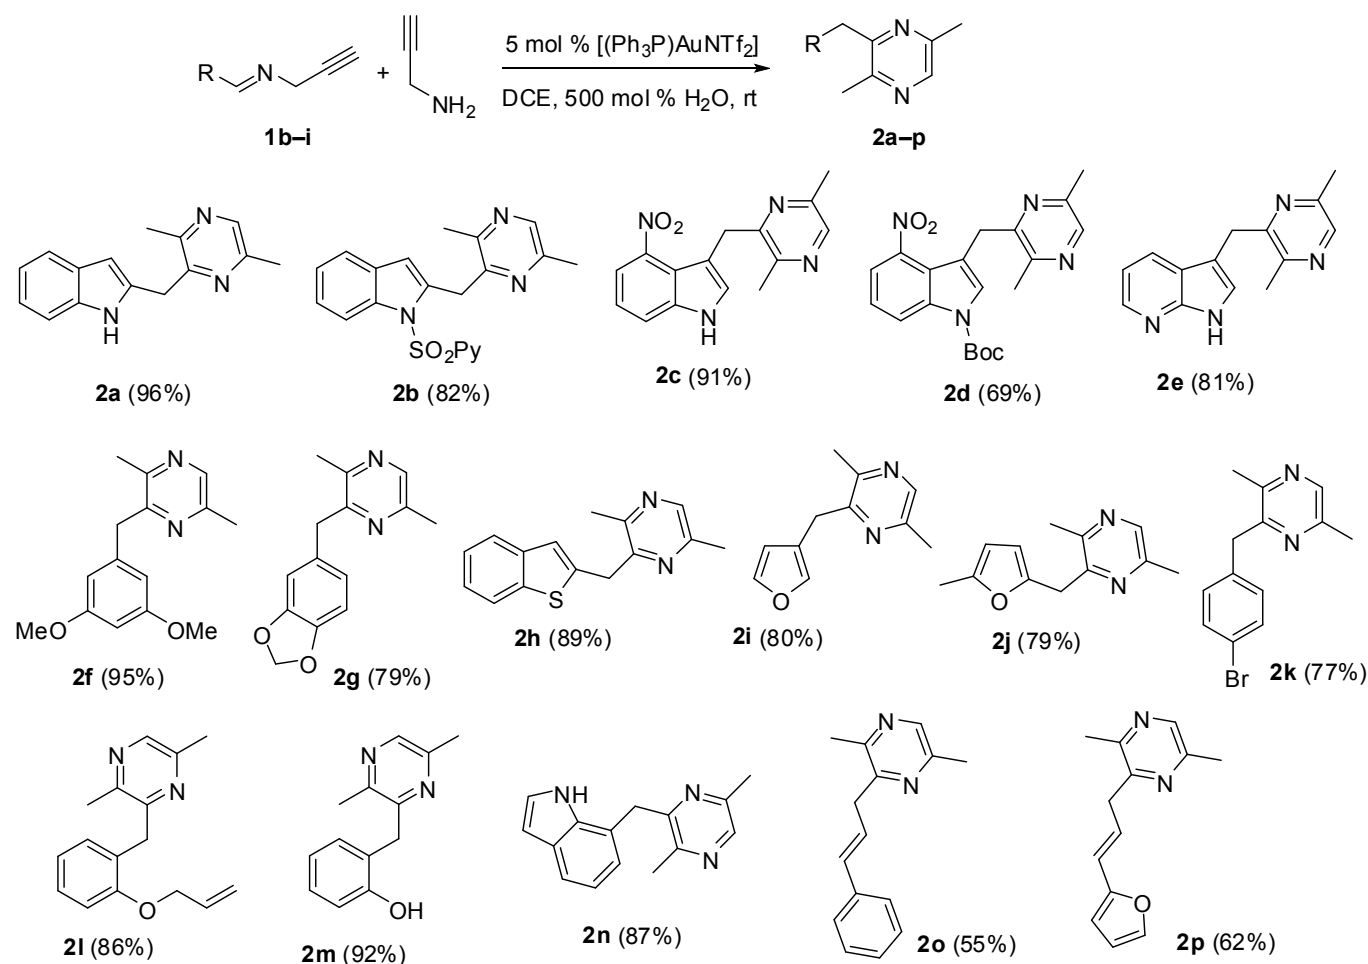

**Scheme S1.** Synthesis of pyrazines **2** through rearrangement/heterocyclization reaction of propargyl imines **1** under gold catalysis.

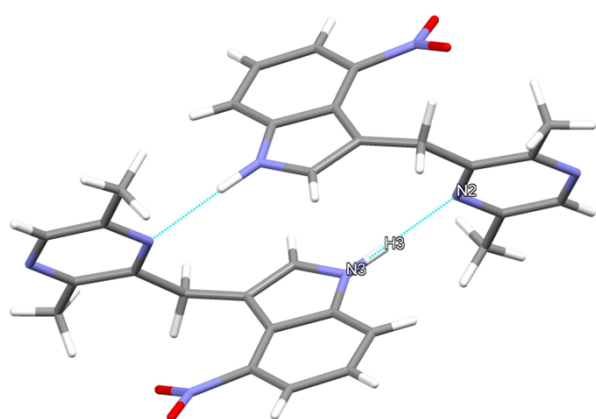

**Figure S1.** X-ray structure of pyrazine **2c** in the solid state. Structure shown as dimer.

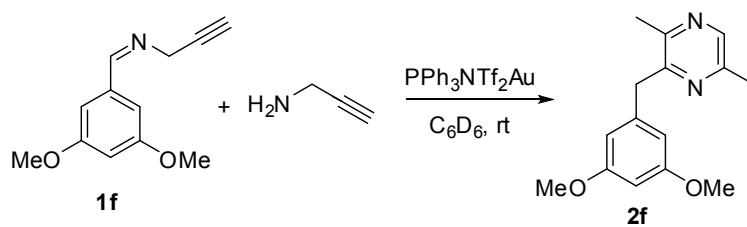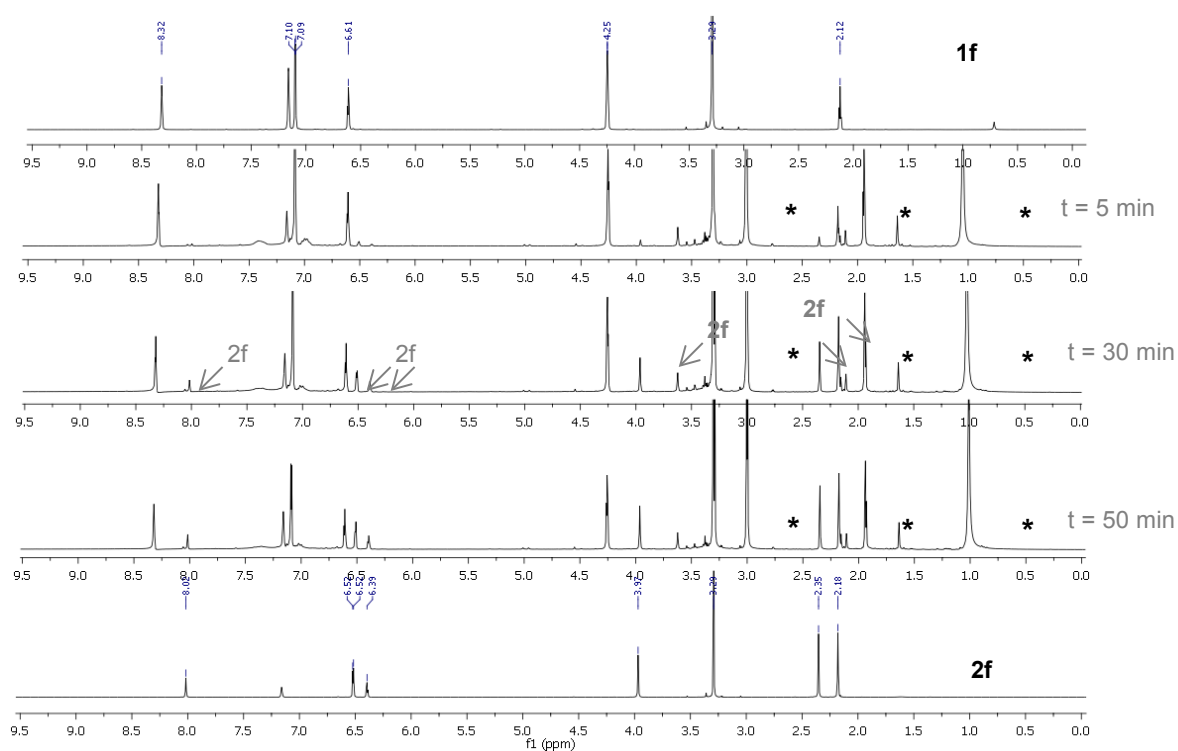

\* Signals from propargylamine

**Figure S2.**  $^1\text{H}$  NMR evolution of the gold-catalyzed reaction between imine **1f** and propargyl amine to pyrazine **2f**.

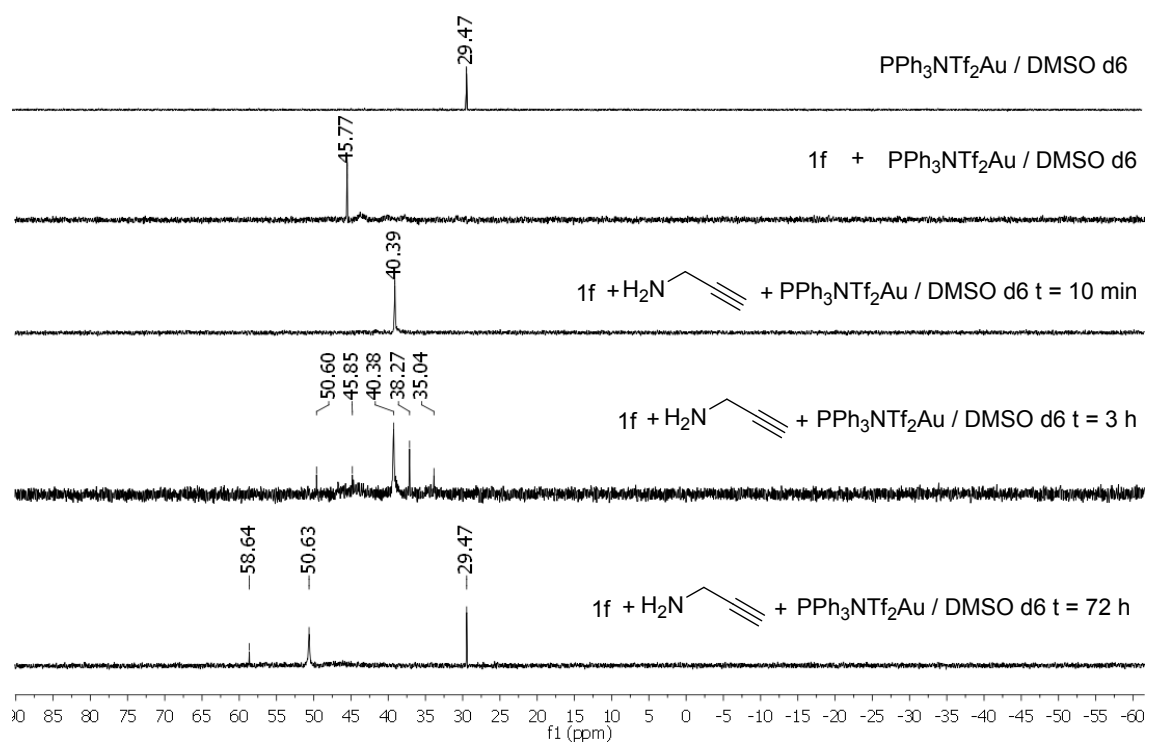

**Figure S3.**  $^{31}\text{P}$  NMR evolution of the gold-catalyzed reaction between imine **1f** and propargyl amine to pyrazine **2f**.

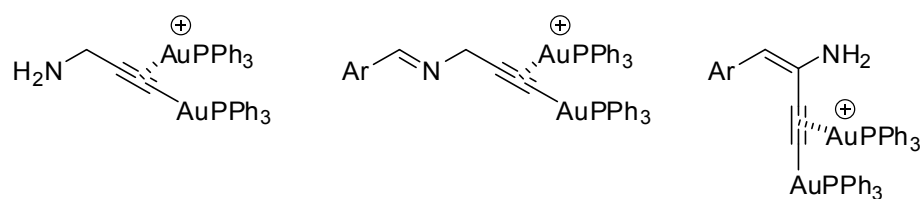

**Figure S4.** Alternative intermediates involved in the gold-catalyzed synthesis of pyrazines **2**.

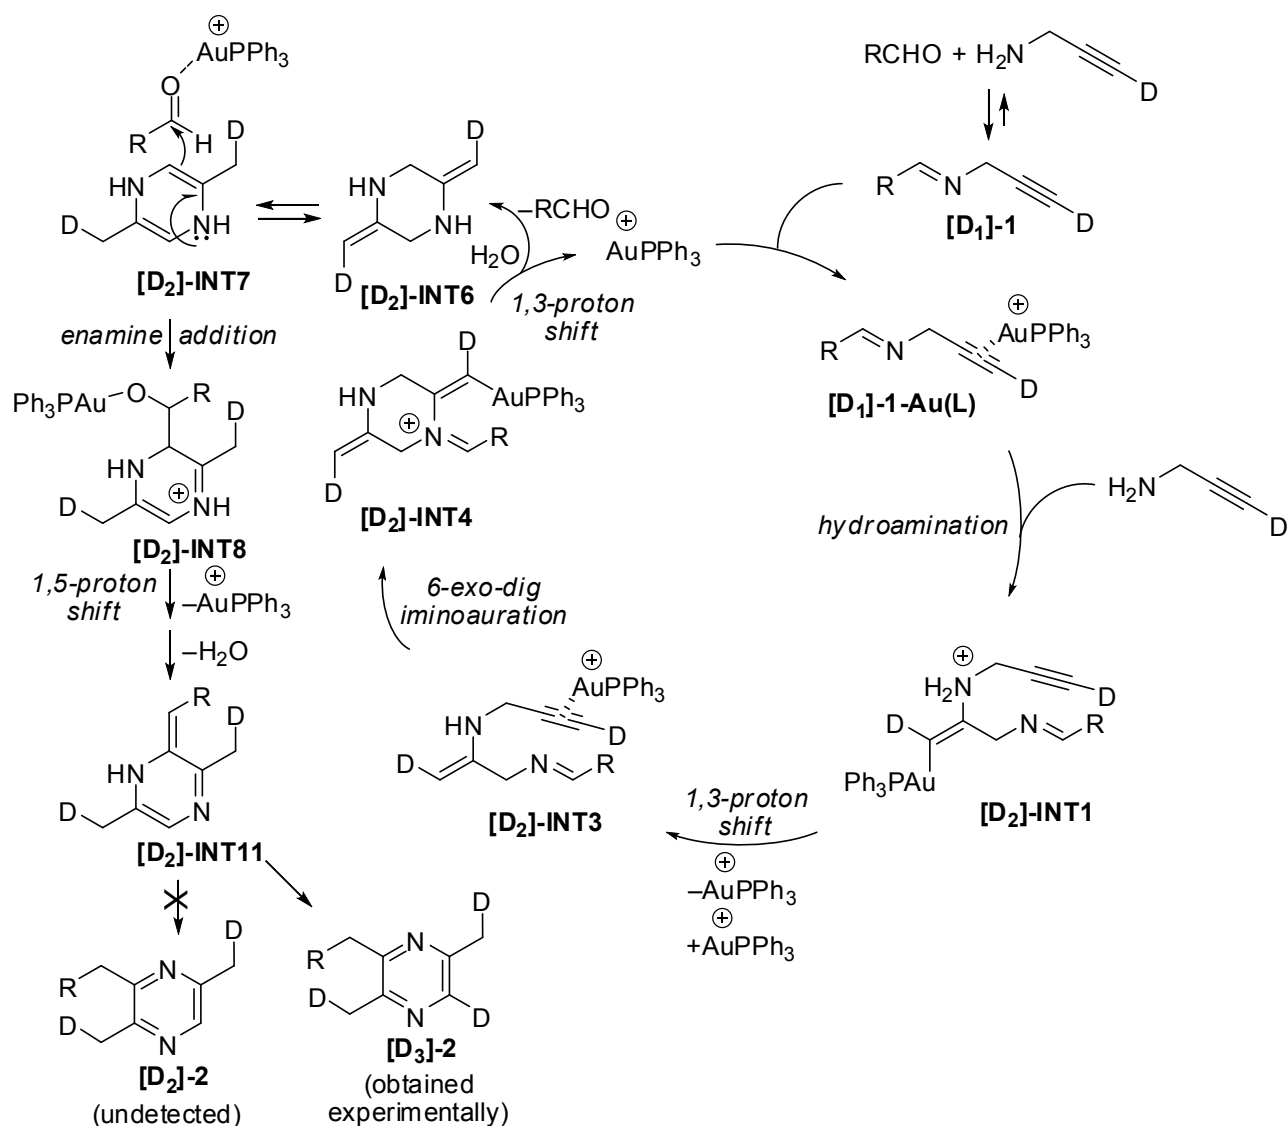

**Scheme S2.** Proposed mechanism for the formation of deuterated pyrazines **[D<sub>3</sub>]-2**.

**General procedure for the synthesis of imines 1.** Over a solution of the corresponding aldehyde (1 mmol) in DCM (4 mL) and in the presence of molecular sieves (4A), propargylamine (1.2 mmol) was added. The resulting mixture was stirred at room temperature until disappearance of the starting material (TLC, typically 12 h). After filtration, the solvent was evaporated under reduced pressure, yielding analytically pure imines. Further purification was not necessary. Spectroscopic and analytical data for previously unreported imines **1** follow.

**Imine 1b.** From 120 mg (0.419 mmol) of the corresponding aldehyde and 0.057 mL (0.839 mmol) of propargylamine, compound **1b** (130 mg, 96%) was obtained as an orange syrup;  $^1\text{H}$  NMR (300 MHz, acetone- $\text{d}_6$ , 25 °C):  $\delta$  = 9.33 (1H, s, CH=N), 8.60 (1H, m, CH Ar), 8.28 (1H, m, CH Ar), 8.15 (2H, m, CH Ar), 7.66 (2H, m, CH Ar), 7.31 (3H, m, CH Ar), 4.57 (2H, s, CHH), 3.08 (1H, t,  $J$  = 2.3 Hz, C $\equiv$ CH);  $^{13}\text{C}$  NMR (75 MHz, acetone- $\text{d}_6$ , 25 °C):  $\delta$  = 155.6 (C Ar), 154.7 (CH=N), 151.1 (CH Ar), 139.3 (CH Ar), 138.5 (C Ar), 138.0 (C Ar), 129.5 (C Ar), 128.9 (CH Ar), 126.4 (CH Ar), 124.6 (CH Ar), 122.8 (CH Ar), 122.5 (CH Ar), 115.1 (CH Ar), 112.1 (CH Ar), 79.4 (C $\equiv$ CH), 76.9 (C $\equiv$ CH), 47.5 (CHH); IR (CHCl $_3$ ):  $\nu$  = 3288, 1628, 1226, 741  $\text{cm}^{-1}$ ; HRMS (ES): calcd for  $\text{C}_{17}\text{H}_{13}\text{N}_3\text{O}_2\text{S}$  [ $M$ ] $^+$ : 323.0728; found: 323.0731.

**Imine 1d.** From 80 mg (0.276 mmol) of the corresponding aldehyde and 0.023 mL (0.592 mmol) of propargylamine, compound **1d** (85 mg, 94%) was obtained as a yellow oil;  $^1\text{H}$  NMR (300 MHz, acetone- $\text{d}_6$ , 25 °C):  $\delta$  = 8.63 (1H, d,  $J$  = 0.5 Hz, CH=N), 8.45 (1H, dd,  $J$  = 8.3, 0.8 Hz, CH Ar), 8.12 (1H, s, CH Ar), 7.79 (1H, dd,  $J$  = 7.9, 0.8 Hz, CH Ar), 7.39 (1H, t,  $J$  = 8.2 Hz, CH Ar), 4.32 (2H, s, CHH), 2.88 (1H, t,  $J$  = 2.5 Hz, C $\equiv$ CH), 1.58 (9H, s, 3Me);  $^{13}\text{C}$  NMR (75 MHz, acetone- $\text{d}_6$ , 25 °C):  $\delta$  = 156.8 (CH=N), 149.7 (C=O), 144.4 (C Ar), 138.8 (C Ar), 132.0 (CH Ar), 125.6 (CH Ar), 121.7 (CH Ar), 121.1 (C Ar), 120.9 (CH Ar), 118.2 (C Ar), 87.0 (C $\equiv$ CH), 80.4 (C(Me) $_3$ ), 77.3 (C $\equiv$ CH), 47.9 (CHH), 28.5 (3C, Me); IR (CHCl $_3$ ):  $\nu$  = 3290, 1628, 1234, 741  $\text{cm}^{-1}$ ; HRMS (ES): calcd for  $\text{C}_{17}\text{H}_{17}\text{N}_3\text{O}_4$  [ $M$ ] $^+$ : 327.1219; found: 327.1220.

**Imine 1e.** From 80 mg (0.548 mmol) of the corresponding aldehyde and 0.045 mL (0.592 mmol) of propargylamine, compound **1e** (93 mg, 93%) was obtained as a colorless solid; mp 160–161 °C;  $^1\text{H}$  NMR (300 MHz, DMSO- $\text{d}_6$ , 25 °C):  $\delta$  = 12.1 (1H, s, NH), 8.65 (1H, s, CH=N), 8.48 (1H, d,  $J$  = 7.2 Hz, CH Ar), 8.31 (1H, d,  $J$  = 3.7 Hz, CH Ar), 8.03 (1H, s, CH Ar), 7.18 (1H, dd,  $J$  = 7.6, 4.7 Hz, CH Ar), 4.46 (1H, s, CHH), 2.52 (1H, s, C $\equiv$ CH);  $^{13}\text{C}$  NMR (75 MHz, DMSO- $\text{d}_6$ , 25 °C):  $\delta$  = 157.8 (CH=N), 148.5 (C Ar), 144.7 (C Ar), 143.8 (CH Ar), 131.9 (CH Ar), 130.0 (CH Ar), 117.2 (CH Ar), 112.5 (CH Ar), 80.7 (C $\equiv$ CH), 76.3 (C $\equiv$ CH), 47.0 (CHH); IR (CHCl $_3$ ):  $\nu$  = 3274, 1631, 1226, 743  $\text{cm}^{-1}$ ; HRMS (ES): calcd for  $\text{C}_{11}\text{H}_9\text{N}_3$  [ $M$ ] $^+$ : 183.0796; found: 183.0793.

**Imine 1f.** From 100 mg (0.602 mmol) of the corresponding aldehyde and 0.050 mL (0.722 mmol) of propargylamine, compound **1f** (120 mg, 98%) was obtained as a colorless solid; mp 87–88 °C; <sup>1</sup>H NMR (300 MHz, C<sub>6</sub>D<sub>6</sub>, 25 °C): δ = 8.44 (1H, s, CH=N), 7.22 (1H, d, *J* = 2.3 Hz, CH Ar), 6.74 (1H, t, *J* = 2.3 Hz, CH Ar), 4.37 (2H, m, CHH), 3.41 (6H, s, 2OMe), 2.24 (2H, t, *J* = 2.5 Hz, C≡CH); <sup>13</sup>C NMR (75 MHz, C<sub>6</sub>D<sub>6</sub>, 25 °C): δ = 162.0 (CH=N), 161.6 (2C, C Ar), 138.7 (C Ar), 106.5 (2C, CH Ar), 104.1 (CH Ar), 79.6 (C≡CH), 75.3 (C≡CH), 54.9 (2C, Me), 47.3 (CHH); IR (CHCl<sub>3</sub>): ν = 3286, 2842, 1646, 1590 cm<sup>-1</sup>; HRMS (ES): calcd for C<sub>12</sub>H<sub>13</sub>NO<sub>2</sub>: [M]<sup>+</sup>: 203.0946; found: 203.0946.

**Imine [D<sub>1</sub>]-1f.** From 169 mg (1.022 mmol) of the corresponding aldehyde and 116 mg (2.044 mmol) of deuterated propargylamine, compound [D<sub>1</sub>]-**1f** (186 mg, 89%) was obtained as a colorless solid; mp 86–87 °C; <sup>1</sup>H NMR (300 MHz, C<sub>6</sub>D<sub>6</sub>, 25 °C): δ = 8.36 (1H, s, CH=N), 6.84 (2H, m, CH Ar), 6.44 (1H, m, CH Ar), 4.35 (2H, m, CHH), 3.68 (6H, s, 2OMe); <sup>13</sup>C NMR (75 MHz, C<sub>6</sub>D<sub>6</sub>, 25 °C): δ = 162.7 (CH=N), 162.1 (2C, C Ar), 139.2 (C Ar), 106.7 (2C, CH Ar), 104.0 (CH Ar), 80.2 (C≡CH), 76.4 (C≡CH), 55.8 (2C, Me), 47.6 (CHH); IR (CHCl<sub>3</sub>): ν = 3288, 2839, 1646, 1590, 1148 cm<sup>-1</sup>; HRMS (ES): calcd for C<sub>12</sub>H<sub>12</sub>DNO<sub>2</sub>: [M]<sup>+</sup>: 204.1009; found: 204.1004.

**Imine 1g.** From 80 mg (0.533 mmol) of the corresponding aldehyde and 0.044 mL (0.640 mmol) of propargylamine, compound **1g** (90 mg, 91%) was obtained as a pale yellow solid; mp 70–71 °C; <sup>1</sup>H NMR (300 MHz, acetone-d<sub>6</sub>, 25 °C): δ = 8.33 (1H, s, CH=N), 7.21 (1H, d, *J* = 1.6 Hz, CH Ar), 7.10 (1H, dd, *J* = 7.9, 1.5 Hz, CH Ar), 6.77 (1H, d, *J* = 7.9 Hz, CH Ar), 5.93 (2H, m, CHH), 4.30 (2H, t, *J* = 2.3 Hz, CHH), 2.82 (1H, t, *J* = 2.5 Hz, C≡CH); <sup>13</sup>C NMR (75 MHz, acetone-d<sub>6</sub>, 25 °C): δ = 161.9 (CH=N), 151.0 (C Ar), 149.3 (C Ar), 132.0 (C Ar), 125.5 (CH Ar), 108.8 (CH Ar), 106.9 (CHH), 102.6 (CH Ar), 80.4 (C≡CH), 76.2 (C≡CH), 47.4 (CHH); IR (CHCl<sub>3</sub>): ν = 3292, 2898, 1642, 1252, 1037 cm<sup>-1</sup>; HRMS (ES): calcd for C<sub>11</sub>H<sub>9</sub>NO<sub>2</sub>: [M]<sup>+</sup>: 187.0633; found: 187.0629.

**Imine 1h.** From 80 mg (0.493 mmol) of the corresponding aldehyde and 0.041 mL (0.592 mmol) of propargylamine, compound **1h** (95 mg, 96%) was obtained as a pale yellow solid; mp 111–112 °C; <sup>1</sup>H

NMR (300 MHz, acetone- $d_6$ , 25 °C):  $\delta$  = 8.72 (1H, s, CH=N), 7.78 (2H, m, CH Ar), 7.68 (1H, s, CH Ar), 7.27 (2H, m, CH Ar), 4.39 (2H, m, CHH), 2.92 (1H, t,  $J$  = 2.3 Hz, C $\equiv$ CH);  $^{13}\text{C}$  NMR (75 MHz, acetone- $d_6$ , 25 °C):  $\delta$  = 157.0 (CH=N), 143.7 (C Ar), 141.4 (C Ar), 140.5 (C Ar), 129.6 (CH Ar), 127.2 (CH Ar), 125.7 (CH Ar), 125.6 (CH Ar), 123.5 (CH Ar), 79.8 (C $\equiv$ CH), 77.1 (C $\equiv$ CH), 47.2 (CHH); IR (CHCl $_3$ ):  $\nu$  = 2895, 1672, 1024  $\text{cm}^{-1}$ ; HRMS (ES): calcd for C $_{12}$ H $_9$ NS [ $M$ ] $^+$ : 199.0456; found: 199.0448.

**General procedure for the gold-catalyzed reaction of imines **1** and propargyl amine. Synthesis of pyrazines **2**.** Propargyl amine (2.0 mmol) and [(Ph $_3$ P)AuNTf $_2$ ] (0.05 mmol) were sequentially added to a stirred solution of the corresponding propargyl imine **1** (1.0 mmol) in 1,2-dichloroethane (4.0 mL). The resulting mixture was stirred at room temperature until disappearance of the starting material (TLC, typically 48 h). After filtration through a pad of Celite, the mixture was extracted with ethyl acetate (3 x 10 mL), and the combined extracts were washed twice with brine. The organic layer was dried (MgSO $_4$ ) and concentrated under reduced pressure. Chromatography of the residue eluting with ethyl acetate/hexanes mixtures gave adducts **2**.

**General procedure for the gold-catalyzed reaction of imines **1** and propargyl amine in the presence of 5 equiv of water. Synthesis of pyrazines **2**.** Propargyl amine (2.0 mmol), [(Ph $_3$ P)AuNTf $_2$ ] (0.05 mmol), and water (5.0 mmol) were sequentially added to a stirred solution of the corresponding propargyl imine **1** (1.0 mmol) in 1,2-dichloroethane (4.0 mL). The resulting mixture was stirred at room temperature until disappearance of the starting material (TLC, typically 20 h). After filtration through a pad of Celite, the mixture was extracted with ethyl acetate (3 x 10 mL), and the combined extracts were washed twice with brine. The organic layer was dried (MgSO $_4$ ) and concentrated under reduced pressure. Chromatography of the residue eluting with ethyl acetate/hexanes mixtures gave adducts **2**.

**Pyrazine **2a**.** From 120 mg (0.659 mmol) of imine **1a**, and after chromatography of the residue using hexanes/ethyl acetate (1:1) as eluent gave compound **2a** (150 mg, 96%) as an orange syrup.



**Pyrazine [D<sub>1</sub>]-2a.** From 100 mg (0.548 mmol) of imine [D<sub>1</sub>]-1a, and after chromatography of the residue using hexanes/ethyl acetate (1:1) as eluent gave compound [D<sub>1</sub>]-2a (122 mg, 94%) as an orange syrup; <sup>1</sup>H NMR (300 MHz, CDCl<sub>3</sub>, 25 °C): δ = 8.80 (1H, s, NH), 8.25 (1H, s, CH Ar), 7.53 (1H, d, *J* = 7.0 Hz, CH Ar), 7.28 (1H, m, CH Ar), 7.10 (2H, m, CH Ar), 6.34 (1H, s, CH Ar), 4.26 (1H, s, CHD), 2.59 (3H, s, Me), 2.54 (3H, s, Me); <sup>13</sup>C NMR (75 MHz, CDCl<sub>3</sub>, 25 °C): δ = 151.4 (C Ar), 150.6 (C Ar), 149.7 (C Ar), 142.3 (CH Ar), 136.7 (C Ar), 134.7 (C Ar), 128.7 (C Ar), 121.9 (CH Ar), 120.4 (CH Ar), 120.1 (CH Ar), 111.0 (CH Ar), 101.4 (CH Ar), 34.4 (t, *J* = 79.9 Hz, CHD), 21.6 (Me), 21.4 (Me); IR (CHCl<sub>3</sub>): ν = 3398–3054, 1452, 784, 743 cm<sup>-1</sup>; HRMS (ES): calcd for C<sub>15</sub>H<sub>14</sub>DN<sub>3</sub> [*M*]<sup>+</sup>: 238.1329; found: 238.1338.

**Pyrazine 2b.** From 148 mg (0.459 mmol) of imine 1b, and after chromatography of the residue using hexanes/ethyl acetate (1:1) as eluent gave compound 2b (150 mg, 82%) as an orange syrup.

**Pyrazine 2c.** From 70 mg (0.203 mmol) of imine 1c, and after chromatography of the residue using hexanes/ethyl acetate (1:1) as eluent gave compound 2c (51 mg, 91%) as a yellow solid; mp 158–159 °C.

**Pyrazine 2d.** From 258 mg (0.789 mmol) of imine 1d, and after chromatography of the residue using hexanes/ethyl acetate (1:1) as eluent gave compound 2d (155 mg, 69%) as an orange syrup.

**Pyrazine 2e.** From 125 mg (0.685 mmol) of imine 1e, and after chromatography of the residue using hexanes/ethyl acetate (1:1) as eluent gave compound 2e (131 mg, 81%) as an orange solid; mp 187–188 °C.

**Pyrazine 2f.** From 153 mg (0.752 mmol) of imine 1f, and after chromatography of the residue using hexanes/ethyl acetate (1:1) as eluent gave compound 2f (184 mg, 95%) as an orange syrup.

**Pyrazine [D<sub>3</sub>]-2f.** From 135 mg (0.666 mmol) of imine [D<sub>1</sub>]-1f and 58 mg (1.0 mmol) of [D<sub>1</sub>]-propargyl amine, and after chromatography of the residue using hexanes/ethyl acetate (1:1) as eluent gave compound [D<sub>3</sub>]-2f (95 mg, 55%) as a dark orange oil; <sup>1</sup>H NMR (300 MHz, CDCl<sub>3</sub>, 25 °C): δ = 6.24 (3H,

m, CH Ar), 4.03 (2H, s, CHH), 3.67 (6H, s, OMe), 2.46 (3H, t,  $J = 2.3$  Hz, Me), 2.38 (3H, t,  $J = 2.3$  Hz, Me);  $^{13}\text{C}$  NMR (75 MHz,  $\text{CDCl}_3$ , 25 °C):  $\delta = 160.9$  (2C, C Ar), 152.9 (C Ar), 141.1 (CH Ar), 140.1 (CH Ar), 107.3 (2C, CH Ar), 98.2 (C Ar), 55.7 (2C, OMe), 41.8 (CHH), 24.1 (d,  $J = 82.9$  Hz,  $\text{CH}_2\text{D}$ ), 20.6 (d,  $J = 82.8$  Hz,  $\text{CH}_2\text{D}$ ); IR ( $\text{CHCl}_3$ ):  $\nu = 1607, 1456, 1153$   $\text{cm}^{-1}$ ; HRMS (ES): calcd for  $\text{C}_{15}\text{H}_{15}\text{D}_3\text{N}_2\text{O}_2$  [ $M$ ] $^+$ : 261.1561; found: 261.1557.

**Pyrazine 2g.** From 187 mg (0.998 mmol) of imine **1g**, and after chromatography of the residue using hexanes/ethyl acetate (1:1) as eluent gave compound **2g** (190 mg, 79%) as a yellow oil.

**Pyrazine 2h.** From 123 mg (0.617 mmol) of imine **1h**, and after chromatography of the residue using hexanes/ethyl acetate (1:1) as eluent gave compound **2h** (138 mg, 89%) as a yellow syrup.

**Pyrazine 2i.** From 138 mg (1.04 mmol) of imine **1i**, and after chromatography of the residue using hexanes/ethyl acetate (1:1) as eluent gave compound **2i** (156 mg, 80%) as a yellow oil.

**General procedure for the gold-catalyzed reaction of aldehydes and propargyl amine. One-pot synthesis of pyrazines 2.** Propargyl amine (4.0 mmol),  $[(\text{Ph}_3\text{P})\text{AuNTf}_2]$  (0.05 mmol), and water (5.0 mmol) were sequentially added to a stirred solution of the corresponding aldehyde (1.0 mmol) in 1,2-dichloroethane (4.0 mL). The resulting mixture was stirred at room temperature until disappearance of the starting material (TLC, typically 40 h). After filtration through a pad of Celite, the mixture was extracted with ethyl acetate (3 x 10 mL), and the combined extracts were washed twice with brine. The organic layer was dried ( $\text{MgSO}_4$ ) and concentrated under reduced pressure. Chromatography of the residue eluting with ethyl acetate/hexanes mixtures gave adducts **2**.

**Pyrazine 2a.** From 96 mg (0.659 mmol) of 1*H*-indole-2-carbaldehyde, and after chromatography of the residue using hexanes/ethyl acetate (1:1) as eluent gave compound **2a** (148 mg, 95%) as an orange syrup;  $^1\text{H}$  NMR (300 MHz,  $\text{CDCl}_3$ , 25 °C):  $\delta = 9.19$  (1H, s, NH), 8.08 (1H, s, CH Ar), 7.40 (1H, dd,  $J = 7.0, 0.6$  Hz, CH Ar), 7.09 (1H, m, CH Ar), 6.94 (2H, m, CH Ar), 6.19 (1H, s, CH Ar), 4.12 (2H, s, CHH), 2.42 (3H, s, Me), 2.27 (3H, s, Me);  $^{13}\text{C}$  NMR (75 MHz,  $\text{CDCl}_3$ , 25 °C):  $\delta = 151.2$  (C Ar), 150.3 (C Ar),

149.5 (C Ar), 141.9 (CH Ar), 136.6 (C Ar), 134.6 (C Ar), 128.4 (C Ar), 121.5 (CH Ar), 120.1 (CH Ar), 119.7 (CH Ar), 110.6 (CH Ar), 101.1 (CH Ar), 34.4 (CHH), 21.3 (Me), 20.8 (Me); IR (CHCl<sub>3</sub>):  $\nu = 3397\text{--}3052, 1452, 783, 743\text{ cm}^{-1}$ ; HRMS (ES): calcd for C<sub>15</sub>H<sub>15</sub>N<sub>3</sub> [M]<sup>+</sup>: 237.1266; found: 237.1265.

**Pyrazine 2b.** From 131 mg (0.459 mmol) of 1-(pyridin-2-ylsulfonyl)-1*H*-indole-2-carbaldehyde, and after chromatography of the residue using hexanes/ethyl acetate (1:1) as eluent gave compound **2b** (139 mg, 80%) as an orange syrup; <sup>1</sup>H NMR (300 MHz, CDCl<sub>3</sub>, 25 °C):  $\delta = 8.48$  (1H, dd,  $J = 4.5, 0.7$  Hz, Ar), 8.21 (1H, s, CH Ar), 7.97 (2H, m, CH Ar), 7.76 (1H, td,  $J = 7.7, 1.6$  Hz, CH Ar), 7.33 (1H, m, CH Ar), 7.19 (1H, m, CH Ar), 7.04 (2H, m, CHH), 5.66 (1H, d,  $J = 0.4$  Hz, CH Ar), 4.71 (2H, s, CHH), 2.46 (3H, s, Me), 2.41 (3H, s, Me); <sup>13</sup>C NMR (75 MHz, CDCl<sub>3</sub>, 25 °C):  $\delta = 155.8$  (C Ar), 151.0 (C Ar), 150.6 (C Ar), 150.4 (CH Ar), 150.1 (CH Ar), 143.5 (C Ar), 141.9 (CH Ar), 139.7 (CH Ar), 138.2 (CH Ar), 136.8 (C Ar), 129.6 (C Ar), 127.6 (CH Ar), 124.1 (CH Ar), 123.6 (CH Ar), 122.0 (CH Ar), 120.3 (CH Ar), 114.32 (CH Ar), 109.6 (CH Ar), 35.7 (CHH), 21.0 (Me), 20.9 (Me); IR (CHCl<sub>3</sub>):  $\nu = 1593, 1368, 1220\text{ cm}^{-1}$ ; HRMS (ES): calcd for C<sub>20</sub>H<sub>19</sub>N<sub>4</sub>O<sub>2</sub>S [M]<sup>+</sup>: 378.1148; found: 378.1150.

**Pyrazine 2c.** From 39 mg (0.203 mmol) of 4-nitro-1*H*-indole-3-carbaldehyde, and after chromatography of the residue using hexanes/ethyl acetate (1:1) as eluent gave compound **2c** (55 mg, 88%) as a yellow solid; mp 158–159 °C; <sup>1</sup>H NMR (300 MHz, CDCl<sub>3</sub>, 25 °C):  $\delta = 8.92$  (1H, s, NH), 8.11 (1H, s, CH Ar), 7.73 (1H, dd,  $J = 7.7, 0.9$  Hz, CH Ar), 7.44 (1H, dd,  $J = 8.0, 0.7$  Hz, CH Ar), 7.10 (1H, t,  $J = 7.9$  Hz, CH Ar), 6.80 (1H, d,  $J = 2.5$  Hz, CH Ar), 4.35 (2H, s, CHH), 2.51 (3H, s, Me), 2.32 (3H, s, Me); <sup>13</sup>C NMR (75 MHz, CDCl<sub>3</sub>, 25 °C):  $\delta = 153.5$  (C Ar), 150.3 (C Ar), 148.9 (C Ar), 143.6 (C Ar), 140.7 (C Ar), 139.2 (C Ar), 127.4 (CH Ar), 120.8 (CH Ar), 119.6 (C Ar), 117.6 (C Ar), 117.5 (CH Ar), 117.2 (CH Ar), 112.2 (CH Ar), 33.3 (CHH), 21.1 (Me), 20.8 (Me); IR (CHCl<sub>3</sub>):  $\nu = 3390\text{--}3035, 1452, 771\text{ cm}^{-1}$ ; HRMS (ES): calcd for C<sub>15</sub>H<sub>14</sub>N<sub>4</sub>O<sub>2</sub> [M]<sup>+</sup>: 282.1112; found: 282.1117. X-ray data of **2c**: crystallized from ethyl acetate/*n*-hexane at 20 °C; C<sub>15</sub>H<sub>14</sub>N<sub>4</sub>O<sub>2</sub> ( $M_r = 282.30$ ); triclinic; space group = P-1;  $a = 8.2193(12)\text{ \AA}$ ,  $b = 8.2471(12)\text{ \AA}$ ;  $c = 11.2596(16)\text{ \AA}$ ;  $\alpha = 103.760(3)^\circ$ ;  $\beta = 91.764(3)^\circ$ ;  $\gamma = 110.780(3)^\circ$ ;  $V = 687.51(17)\text{ \AA}^3$ ;  $Z = 2$ ;  $cd = 1.364\text{ mg m}^{-3}$ ;  $\mu = 0.094\text{ mm}^{-1}$ ;  $F(000) = 296$ . A transparent

crystal of 0.31 x 0.24 x 0.15 mm<sup>3</sup> was used. 2354 ( $R_{\text{int}} = 0.0378$ ) independent reflections were collected on a Bruker Smart CCD diffractometer using graphite-monochromated Mo-K $\alpha$  radiation ( $\lambda = 0.71073 \text{ \AA}$ ) operating at 50 Kv and 25 mA. Data were collected over a hemisphere of the reciprocal space by combination of three exposure sets. Each exposure of 20s covered 0.3 in  $\omega$ . The cell parameters were determined and refined by a least-squares fit of all reflections. The first 100 frames were recollected at the end of the data collection to monitor crystal decay, and no appreciable decay was observed. The structure was solved by direct methods and Fourier synthesis. It was refined by full-matrix least-squares procedures on  $F^2$  (SHELXL-97). All non-hydrogen atoms were refined anisotropically. All hydrogen atoms were included in calculated positions and refined riding on the respective carbon atoms. Final R indices [ $I > 2\sigma(I)$ ] values were  $R1 = 0.0389$ ,  $wR2 = 0.0816$ . CCDC-953438 contains the supplementary crystallographic data for this paper. These data can be obtained free of charge via the [www.ccdc.cam.ac.uk/deposit](http://www.ccdc.cam.ac.uk/deposit) (or from The Cambridge Crystallographic Data Centre, 12 Union Road, Cambridge CB21EZ, UK; Fax (+44)1223-336033; or [deposit@ccdc.cam.ac.uk](mailto:deposit@ccdc.cam.ac.uk)).

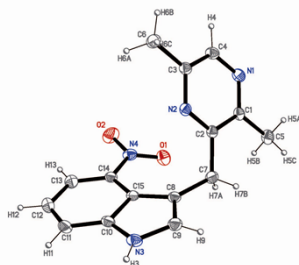

ORTEP drawing of pyrazine **2c**.

**Pyrazine 2d.** From 229 mg (0.789 mmol) of imine **1d**, and after chromatography of the residue using hexanes/ethyl acetate (1:1) as eluent gave compound **2d** (223 mg, 74%) as an orange syrup; <sup>1</sup>H NMR (300 MHz, CDCl<sub>3</sub>, 25 °C):  $\delta = 8.46$  (1H, d,  $J = 8.2$  Hz, Ar), 8.06 (1H, s, CH Ar), 7.75 (1H, dd,  $J = 8.0, 1.0$  Hz, CH Ar), 7.35 (1H, s, CH Ar), 7.30 (1H, t,  $J = 8.2$  Hz, CH Ar), 4.24 (2H, s, CHH), 2.50 (3H, s, Me), 2.22 (3H, s, Me), 1.57 (9H, s, Me); <sup>13</sup>C NMR (75 MHz, CDCl<sub>3</sub>, 25 °C):  $\delta = 152.1$  (C Ar), 150.3 (C=O), 148.9 (C Ar), 148.4 (C Ar), 144.3 (C Ar), 141.1 (CH Ar), 137.8 (C Ar), 128.1 (CH Ar), 123.4 (CH Ar), 123.3 (C Ar), 120.3 (CH Ar), 119.2 (CH Ar), 115.9 (C Ar), 84.9 (C), 32.9 (CHH), 28.1 (3C,

Me), 21.2 (Me), 20.8 (Me); IR (CHCl<sub>3</sub>):  $\nu = 1752, 1450, 784 \text{ cm}^{-1}$ ; HRMS (ES): calcd for C<sub>20</sub>H<sub>22</sub>N<sub>4</sub>O<sub>4</sub> [M]<sup>+</sup>: 382.1644; found: 382.1641.

**Pyrazine 2e.** From 100 mg (0.685 mmol) of 1*H*-pyrrolo[2,3-*b*]pyridine-3-carbaldehyde, and after chromatography of the residue using hexanes/ethyl acetate (1:1) as eluent gave compound **2e** (122 mg, 75%) as an orange solid; mp 187–188 °C; <sup>1</sup>H NMR (300 MHz, CDCl<sub>3</sub>, 25 °C):  $\delta = 11.78$  (1H, s, NH), 8.18 (1H, dd,  $J = 4.7, 1.5 \text{ Hz}$ , CH Ar), 8.11 (1H, s, CH Ar), 7.86 (1H, dd,  $J = 7.7, 1.3 \text{ Hz}$ , CH Ar), 6.94 (2H, m, CH Ar), 4.15 (2H, s, CHH), 2.43 (3H, s, Me), 2.39 (3H, s, Me); <sup>13</sup>C NMR (75 MHz, CDCl<sub>3</sub>, 25 °C):  $\delta = 151.8$  (C Ar), 150.2 (C Ar), 149.2 (C Ar), 149.1 (CH Ar), 142.3 (CH Ar), 141.3 (CH Ar), 128.1 (CH Ar), 123.2 (CH Ar), 120.3 (C Ar), 115.3 (CH Ar), 110.6 (C Ar), 32.4 (CHH), 21.3 (Me), 21.1 (Me); IR (CHCl<sub>3</sub>):  $\nu = 3388\text{--}3124, 1443, 743 \text{ cm}^{-1}$ ; HRMS (ES): calcd for C<sub>14</sub>H<sub>14</sub>N<sub>4</sub> [M]<sup>+</sup>: 238.1213; found: 238.1218.

**Pyrazine 2f.** From 125 mg (0.752 mmol) of 3,5-dimethoxybenzaldehyde, and after chromatography of the residue using hexanes/ethyl acetate (1:1) as eluent gave compound **2f** (176 mg, 91%) as an orange syrup; <sup>1</sup>H NMR (300 MHz, CDCl<sub>3</sub>, 25 °C):  $\delta = 8.13$  (1H, s, CH Ar), 6.24 (3H, m, CH Ar), 4.02 (2H, s, CHH), 3.66 (6H, s, OMe), 2.45 (3H, s, Me), 2.38 (3H, s, Me); <sup>13</sup>C NMR (75 MHz, CDCl<sub>3</sub>, 25 °C):  $\delta = 161.2$  (2C, C Ar), 153.1 (C Ar), 150.6 (C Ar), 149.8 (C Ar), 141.8 (CH Ar), 140.6 (CH Ar), 107.3 (2C, CH Ar), 98.4 (C Ar), 55.6 (2C, OMe), 42.2 (CHH), 21.8 (Me), 21.4 (Me); IR (CHCl<sub>3</sub>):  $\nu = 1605, 1455, 1155 \text{ cm}^{-1}$ ; HRMS (ES): calcd for C<sub>15</sub>H<sub>18</sub>N<sub>2</sub>O<sub>2</sub> [M]<sup>+</sup>: 258.1372; found: 258.1368.

**Pyrazine 2g.** From 150 mg (0.998 mmol) of piperonal, and after chromatography of the residue using hexanes/ethyl acetate (1:1) as eluent gave compound **2g** (198 mg, 82%) as a yellow oil; <sup>1</sup>H NMR (300 MHz, CDCl<sub>3</sub>, 25 °C):  $\delta = 8.13$  (1H, s, CH Ar), 6.59 (3H, m, CH Ar), 5.83 (2H, s, CHH), 3.99 (2H, s, CHH), 2.45 (3H, s, Me), 2.37 (3H, s, Me); <sup>13</sup>C NMR (75 MHz, CDCl<sub>3</sub>, 25 °C):  $\delta = 153.0$  (C Ar), 150.2 (C Ar), 149.3 (C Ar), 147.7 (C Ar), 146.2 (C Ar), 141.5 (CH Ar), 131.7 (C Ar), 121.6 (CH Ar), 109.1 (CH Ar), 108.2 (CH Ar), 100.9 (CHH), 41.3 (CHH), 21.4 (Me), 21.1 (Me); IR (CHCl<sub>3</sub>):  $\nu = 1486, 1240, 1034, 787 \text{ cm}^{-1}$ ; HRMS (ES): calcd for C<sub>14</sub>H<sub>14</sub>N<sub>2</sub>O<sub>2</sub> [M]<sup>+</sup>: 242.1051; found: 242.1055.

**Pyrazine 2h.** From 100 mg (0.617 mmol) of benzo[*b*]thiophene-2-carbaldehyde, and after chromatography of the residue using hexanes/ethyl acetate (1:1) as eluent gave compound **2h** (136 mg, 87%) as a yellow syrup; <sup>1</sup>H NMR (300 MHz, CDCl<sub>3</sub>, 25 °C): δ = 8.15 (1H, s, Ar), 7.62 (1H, m, CH Ar), 7.52 (1H, m, CH Ar), 7.15 (2H, m, CH Ar), 6.85 (1H, d, *J* = 0.7 Hz, CH Ar), 4.28 (2H, s, CHH), 2.44 (3H, s, Me), 2.43 (3H, s, Me); <sup>13</sup>C NMR (75 MHz, CDCl<sub>3</sub>, 25 °C): δ = 151.5 (C Ar), 150.6 (C Ar), 149.2 (C Ar), 142.0 (CH Ar), 141.6 (C Ar), 139.8 (C Ar), 139.7 (C Ar), 142.2 (CH Ar), 123.8 (CH Ar), 123.0 (CH Ar), 122.1 (CH Ar), 121.9 (CH Ar), 37.0 (CHH), 21.3 (Me), 21.0 (Me); IR (CHCl<sub>3</sub>): ν = 1456, 1435, 1367, 746 cm<sup>-1</sup>; HRMS (ES): calcd for C<sub>15</sub>H<sub>14</sub>N<sub>2</sub>S [*M*]<sup>+</sup>: 254.0877; found: 254.0878.

**Pyrazine 2i.** From 100 mg (1.04 mmol) of furan-3-carbaldehyde, and after chromatography of the residue using hexanes/ethyl acetate (1:1) as eluent gave compound **2i** (162 mg, 83%) as a yellow oil; <sup>1</sup>H NMR (300 MHz, C<sub>6</sub>D<sub>6</sub>, 25 °C): δ = 8.13 (1H, s, Ar), 7.28 (1H, s, CH Ar), 7.14 (1H, m, CH Ar), 6.26 (1H, s, CH Ar), 3.77 (2H, s, CHH), 2.41 (3H, s, Me), 2.29 (3H, s, Me); <sup>13</sup>C NMR (75 MHz, C<sub>6</sub>D<sub>6</sub>, 25 °C): δ = 152.5 (C Ar), 150.4 (C Ar), 149.0 (C Ar), 143.2 (CH Ar), 141.7 (CH Ar), 139.8 (CH Ar), 121.9 (C Ar), 111.4 (C Ar), 31.3 (CHH), 21.1 (Me), 20.8 (Me); IR (CHCl<sub>3</sub>): ν = 2926, 1455, 1367, 1160, 873 cm<sup>-1</sup>; HRMS (ES): calcd for C<sub>11</sub>H<sub>12</sub>N<sub>2</sub>O [*M*]<sup>+</sup>: 188.0949; found: 188.0950.

**Pyrazine 2j.** From 50 mg (0.454 mmol) of 5-methylfuran-2-carbaldehyde, and after chromatography of the residue using hexanes/ethyl acetate (3:1) as eluent gave compound **2j** (69 mg, 77%) as a yellow oil; <sup>1</sup>H NMR (300 MHz, CDCl<sub>3</sub>, 25 °C): δ = 8.21 (1H, s, CH Ar), 5.83 (2H, s, 2CH Ar), 4.09 (2H, s, CHH), 2.53 (3H, s, Me), 2.50 (3H, s, Me), 2.21 (3H, s, Me); <sup>13</sup>C NMR (75 MHz, CDCl<sub>3</sub>, 25 °C): δ = 151.2 (C Ar), 150.6 (C Ar), 150.3 (C Ar), 149.6 (C Ar), 149.4 (C Ar), 141.6 (CH Ar), 107.2 (CH Ar), 106.1 (CH Ar), 35.0 (CHH), 21.2 (Me), 21.0 (Me), 13.5 (Me); IR (CHCl<sub>3</sub>): ν = 2925, 1454, 1375, 778 cm<sup>-1</sup>; HRMS (ES): calcd for C<sub>12</sub>H<sub>14</sub>N<sub>2</sub>O [*M*]<sup>+</sup>: 202.1106; found: 202.1112.

**Pyrazine 2k.** From 50 mg (0.270 mmol) of 4-bromobenzaldehyde, and after chromatography of the residue using hexanes/ethyl acetate (1:1) as eluent gave compound **2k** (56 mg, 75%) as a yellow oil; <sup>1</sup>H NMR (300 MHz, CDCl<sub>3</sub>, 25 °C): δ = 8.23 (1H, s, CH Ar), 7.39 (2H, d, *J* = 8.4 Hz, 2CH Ar), 7.05 (2H, d,

$J = 8.3$  Hz, 2CH Ar), 4.10 (2H, s, CHH), 2.53 (3H, s, Me), 2.43 (3H, s, Me);  $^{13}\text{C}$  NMR (75 MHz,  $\text{CDCl}_3$ , 25 °C):  $\delta = 152.3$  (C Ar), 150.4 (C Ar), 149.1 (C Ar), 141.6 (CH Ar), 136.9 (C Ar), 131.6 (2C, CH Ar), 130.3 (2C, CH Ar), 120.3 (C Ar), 40.9 (CHH), 21.3 (Me), 21.0 (Me); IR ( $\text{CHCl}_3$ ):  $\nu = 1455, 1011\text{ cm}^{-1}$ ; HRMS (ES): calcd for  $\text{C}_{13}\text{H}_{13}\text{N}_2\text{Br}$  [ $M$ ] $^+$ : 276.0262; found: 276.0273.

**Pyrazine 2l.** From 50 mg (0.308 mmol) of 2-(allyloxy)benzaldehyde, and after chromatography of the residue using hexanes/ethyl acetate (3:1) as eluent gave compound **2l** (69 mg, 89%) as a yellow oil;  $^1\text{H}$  NMR (300 MHz,  $\text{CDCl}_3$ , 25 °C):  $\delta = 8.20$  (1H, s, CH Ar), 7.16 (1H, m, CH Ar), 6.87 (3H, m, 3CH Ar), 6.03 (1H, m, CH=), 5.40 (1H, m, =CHH), 5.26 (1H, m, =CHH), 4.55 (2H, m, OCHH), 4.19 (2H, s, CHH), 2.50 (3H, s, Me), 2.44 (3H, s, Me);  $^{13}\text{C}$  NMR (75 MHz,  $\text{CDCl}_3$ , 25 °C):  $\delta = 155.9$  (C Ar), 153.2 (C Ar), 150.0 (C Ar), 149.5 (C Ar), 141.0 (CH Ar), 133.2 (CH Ar), 129.6 (CH Ar), 127.4 (CH Ar), 126.8 (C Ar), 120.6 (CH Ar), 117.2 (=CHH), 111.4 (CH=), 68.7 (OCHH), 35.1 (CHH), 21.2 (Me), 21.0 (Me); IR ( $\text{CHCl}_3$ ):  $\nu = 1449, 1240, 752\text{ cm}^{-1}$ ; HRMS (ES): calcd for  $\text{C}_{16}\text{H}_{18}\text{N}_2\text{O}$  [ $M$ ] $^+$ : 254.1419; found: 254.1430.

**Pyrazine 2m.** From 50 mg (0.409 mmol) of salicylaldehyde, and after chromatography of the residue using hexanes/ethyl acetate (3:1) as eluent gave compound **2m** (85 mg, 97%) as a pale yellow solid; mp 119–121 °C ;  $^1\text{H}$  NMR (300 MHz,  $\text{CDCl}_3$ , 25 °C):  $\delta = 10.4$  (1H, brs, OH), 8.24 (1H, s, CH Ar), 7.18 (2H, m, 2CH Ar), 6.98 (1H, dd,  $J = 8.0, 1.0$  Hz, CH Ar), 6.85 (1H, td,  $J = 7.4, 1.2$  Hz, CH Ar), 4.10 (2H, s, CHH), 2.70 (3H, s, Me), 2.52 (3H, s, Me);  $^{13}\text{C}$  NMR (75 MHz,  $\text{CDCl}_3$ , 25 °C):  $\delta = 156.4$  (C Ar), 152.6 (C Ar), 148.9 (C Ar), 148.6 (C Ar), 142.0 (CH Ar), 130.2 (CH Ar), 128.7 (CH Ar), 124.3 (C Ar), 120.1 (CH Ar), 118.1 (CH Ar), 37.0 (CHH), 21.3 (Me), 20.4 (Me); IR ( $\text{CHCl}_3$ ):  $\nu = 3072, 1453, 1246, 755\text{ cm}^{-1}$ ; HRMS (ES): calcd for  $\text{C}_{13}\text{H}_{14}\text{N}_2\text{O}$  [ $M$ ] $^+$ : 214.1106; found: 214.1113.

**Pyrazine 2n.** From 50 mg (0.344 mmol) of indole-7-carboxaldehyde, and after chromatography of the residue using hexanes/ethyl acetate (1:1) as eluent gave compound **2n** (69 mg, 85%) as a pale yellow solid; mp 111–113 °C ;  $^1\text{H}$  NMR (300 MHz,  $\text{CDCl}_3$ , 25 °C):  $\delta = 10.1$  (1H, brs, NH), 8.24 (1H, s, CH Ar), 7.59 (1H, d,  $J = 7.8$  Hz, CH Ar), 7.28 (1H, m, CH Ar), 7.15 (2H, m, 2CH Ar), 6.57 (1H, dd,  $J = 2.9, 2.3$  Hz, CH Ar), 4.39 (2H, s, CHH), 2.69 (3H, s, Me), 2.62 (3H, s, Me);  $^{13}\text{C}$  NMR (75 MHz,  $\text{CDCl}_3$ , 25 °C):  $\delta$

= 151.7 (C Ar), 149.8 (C Ar), 149.2 (C Ar), 141.5 (CH Ar), 135.8 (C Ar), 128.2 (C Ar), 124.3 (CH Ar), 122.3 (CH Ar), 119.9 (C Ar), 119.7 (CH Ar), 119.6 (CH Ar), 102.4 (CH Ar), 39.4 (CHH), 21.5 (Me), 21.0 (Me); IR (CHCl<sub>3</sub>):  $\nu$  = 3350, 2924, 1455, 731 cm<sup>-1</sup>; HRMS (ES): calcd for C<sub>15</sub>H<sub>15</sub>N<sub>3</sub> [M]<sup>+</sup>: 237.1266; found: 237.1260.

**Pyrazine 2o.** From 50 mg (0.378 mmol) of (*E*)-cinnamaldehyde, and after chromatography of the residue using hexanes/ethyl acetate (1:1) as eluent gave compound **2o** (37 mg, 56%) as a yellow oil; <sup>1</sup>H NMR (300 MHz, CDCl<sub>3</sub>, 25 °C):  $\delta$  = 8.13 (1H, s, CH Ar), 7.19 (5H, m, 5CH Ar), 6.30 (2H, m, HC=CH), 3.64 (2H, d, *J* = 6.0 Hz, CHH), 2.48 (3H, s, Me), 2.44 (3H, s, Me); <sup>13</sup>C NMR (75 MHz, CDCl<sub>3</sub>, 25 °C):  $\delta$  = 152.3 (C Ar), 150.4 (C Ar), 149.1 (C Ar), 141.3 (CH Ar), 137.1 (C Ar), 131.9 (CH Ar), 128.5 (2C, CH Ar), 127.3 (CH Ar), 126.1 (2C, CH Ar), 125.8 (CH Ar), 39.2 (CHH), 21.2 (Me), 21.0 (Me); IR (CHCl<sub>3</sub>):  $\nu$  = 1449, 694 cm<sup>-1</sup>; HRMS (ES): calcd for C<sub>15</sub>H<sub>16</sub>N<sub>2</sub> [M]<sup>+</sup>: 224.1313; found: 224.1319.

**Pyrazine 2p.** From 50 mg (0.409 mmol) of (*E*)-3-(furan-2-yl)acrylaldehyde, and after chromatography of the residue using hexanes/ethyl acetate (1:1) as eluent gave compound **2p** (56 mg, 64%) as a yellow oil; <sup>1</sup>H NMR (300 MHz, CDCl<sub>3</sub>, 25 °C):  $\delta$  = 8.22 (1H, s, CH Ar), 7.31 (1H, d, *J* = 1.3 Hz, CH Ar), 6.34 (1H, dd, *J* = 3.2, 1.8 Hz CH Ar), 6.24 (3H, m, CH Ar, HC=CH), 3.71 (2H, d, *J* = 5.6 Hz, CHH), 2.56 (3H, s, Me), 2.53 (3H, s, Me); <sup>13</sup>C NMR (75 MHz, CDCl<sub>3</sub>, 25 °C):  $\delta$  = 152.5 (C Ar), 152.2 (C Ar), 150.4 (C Ar), 149.0 (C Ar), 141.7 (CH Ar), 141.2 (CH Ar), 124.4 (CH Ar), 120.5 (CH Ar), 111.2 (CH Ar), 107.2 (CH Ar), 38.8 (CHH), 21.0 (Me), 21.0 (Me); IR (CHCl<sub>3</sub>):  $\nu$  = 2925, 1451, 736 cm<sup>-1</sup>; HRMS (ES): calcd for C<sub>13</sub>H<sub>14</sub>N<sub>2</sub>O [M]<sup>+</sup>: 214.1106; found: 214.1104.

**Procedure for the gold-catalyzed reaction of imine 1f and propargyl amine in a heavy water medium. Preparation of pyrazine [D<sub>3</sub>]-2f.** Propargyl amine (52 mg, 0.939 mmol), [(Ph<sub>3</sub>P)AuNTf<sub>2</sub>] (29 mg, 0.037 mmol), and D<sub>2</sub>O (15 mmol) were sequentially added to a stirred solution of the imine **1f** (153 mg, 0.752 mmol) in 1,2-dichloroethane (3.0 mL). The resulting mixture was stirred at room temperature for 2 days. After filtration through a pad of Celite, the mixture was extracted with ethyl acetate (3 x 5 mL), and the combined extracts were washed twice with brine. The organic layer was dried (MgSO<sub>4</sub>) and



concentrated under reduced pressure. Chromatography of the residue eluting with hexanes/ethyl acetate (1:1) gave 103 mg (54%) of adduct **[D<sub>3</sub>]-2f** as a dark orange oil; HRMS (ES): calcd for C<sub>15</sub>H<sub>16</sub>D<sub>3</sub>N<sub>2</sub>O<sub>2</sub> [*M* + H]<sup>+</sup>: 262.1635; found: 262.1629.

## Computational Details

All the calculations reported in this paper were obtained with the GAUSSIAN 09 suite of programs.<sup>1</sup> Electron correlation was partially taken into account using the hybrid functional usually denoted as B3LYP<sup>2</sup> using the double- $\zeta$  quality plus polarization def2-SVP basis set<sup>3</sup> for all atoms. Reactants and products were characterized by frequency calculations,<sup>4</sup> and have positive definite Hessian matrices. Transition structures (TS's) show only one negative eigenvalue in their diagonalized force constant matrices, and their associated eigenvectors were confirmed to correspond to the motion along the reaction coordinate under consideration using the Intrinsic Reaction Coordinate (IRC) method.<sup>5</sup> Solvents effects were taken into account using the Polarizable Continuum Model (PCM).<sup>6</sup> Single point calculations (PCM-M06/def2-SVP) on the gas-phase optimized geometries were performed to estimate the change in the Gibbs energies in the presence of dichloroethane as solvent using the dispersion corrected M06<sup>7</sup> functional. This level is denoted PCM-M06/def2-SVP//B3LYP/def2-SVP.

---

<sup>1</sup> Gaussian 09, Revision B.01, Frisch, M. J.; Trucks, G. W.; Schlegel, H. B.; Scuseria, G. E.; Robb, M. A.; Cheeseman, J. R.; Scalmani, G.; Barone, V.; Mennucci, B.; Petersson, G. A.; Nakatsuji, H.; Caricato, M.; Li, X.; Hratchian, H. P.; Izmaylov, A. F.; Bloino, J.; Zheng, G.; Sonnenberg, J. L.; Hada, M.; Ehara, M.; Toyota, K.; Fukuda, R.; Hasegawa, J.; Ishida, M.; Nakajima, T.; Honda, Y.; Kitao, O.; Nakai, H.; Vreven, T.; Montgomery, Jr., J. A.; Peralta, J. E.; Ogliaro, F.; Bearpark, M.; Heyd, J. J.; Brothers, E.; Kudin, K. N.; Staroverov, V. N.; Kobayashi, R.; Normand, J.; Raghavachari, K.; Rendell, A.; Burant, J. C.; Iyengar, S. S.; Tomasi, J.; Cossi, M.; Rega, N.; Millam, N. J.; Klene, M.; Knox, J. E.; Cross, J. B.; Bakken, V.; Adamo, C.; Jaramillo, J.; Gomperts, R.; Stratmann, R. E.; Yazyev, O.; Austin, A. J.; Cammi, R.; Pomelli, C.; Ochterski, J. W.; Martin, R. L.; Morokuma, K.; Zakrzewski, V. G.; Voth, G. A.; Salvador, P.; Dannenberg, J. J.; Dapprich, S.; Daniels, A. D.; Farkas, Ö.; Foresman, J. B.; Ortiz, J. V.; Cioslowski, J.; Fox, D. J. Gaussian, Inc., Wallingford CT, 2009.

<sup>2</sup> (a) Becke, A. D. *J. Chem. Phys.* **1993**, *98*, 5648. (b) Lee, C.; Yang, W.; Parr, R. G. *Phys. Rev. B* **1998**, *37*, 785. (c) Vosko, S. H.; Wilk, L.; Nusair, M. *Can. J. Phys.* **1980**, *58*, 1200.

<sup>3</sup> Weigend, F.; Alrichs, R. *Phys. Chem. Chem. Phys.* **2005**, *7*, 3297.

<sup>4</sup> McIver, J. W.; Komornicki, A. K. *J. Am. Chem. Soc.* **1972**, *94*, 2625.

<sup>5</sup> González, C.; Schlegel, H. B. *J. Phys. Chem.* **1990**, *94*, 5523.

<sup>6</sup> (a) Miertuš, S.; Scrocco, E.; Tomasi, J. *Chem. Phys.* **1981**, *55*, 117. (b) Pascual-Ahuir, J. L.; Silla, E.; Tuñón, I. *J. Comp. Chem.* **1994**, *15*, 1127. (c) Barone, V.; Cossi, M. *J. Phys. Chem. A*, 1998, *102*, 1995.

<sup>7</sup> Y. Zhao, D. G. Truhlar, *Acc. Chem. Res.* **2008**, *41*, 157.

Cartesian coordinates (in Å) and free energies (in a. u.) of all the stationary points discussed in the text. All calculations have been performed at the PCM-M06/def2-SVP//B3LYP/def2-SVP.

**1M-Au:** E= -1036.716164

|    |              |              |              |
|----|--------------|--------------|--------------|
| C  | 0.333770000  | -2.627840000 | 0.022730000  |
| C  | 1.354580000  | -2.787260000 | -0.647250000 |
| H  | 2.158160000  | -3.165470000 | -1.262740000 |
| Au | 1.519110000  | -0.579320000 | -0.124650000 |
| P  | 2.217710000  | 1.636480000  | 0.082580000  |
| C  | 3.067730000  | 2.253380000  | -1.416270000 |
| H  | 2.394110000  | 2.183170000  | -2.282860000 |
| H  | 3.368510000  | 3.303170000  | -1.273520000 |
| H  | 3.962010000  | 1.644740000  | -1.614850000 |
| C  | 3.382410000  | 1.902770000  | 1.468480000  |
| H  | 3.671920000  | 2.964070000  | 1.521240000  |
| H  | 2.907040000  | 1.608640000  | 2.415720000  |
| H  | 4.282690000  | 1.288080000  | 1.322180000  |
| C  | 0.817190000  | 2.778490000  | 0.374930000  |
| H  | 0.305550000  | 2.503950000  | 1.308990000  |
| H  | 1.183380000  | 3.814360000  | 0.451310000  |
| H  | 0.098910000  | 2.705150000  | -0.454640000 |
| C  | -0.920430000 | -2.590410000 | 0.797620000  |
| H  | -0.656390000 | -2.687560000 | 1.867550000  |
| H  | -1.492350000 | -3.503440000 | 0.526540000  |
| N  | -1.640550000 | -1.350610000 | 0.589250000  |
| C  | -2.885190000 | -1.430050000 | 0.305580000  |
| H  | -3.379760000 | -2.415940000 | 0.192540000  |
| C  | -3.762050000 | -0.270450000 | 0.111000000  |
| C  | -3.305860000 | 1.048300000  | 0.303490000  |
| C  | -5.098330000 | -0.486230000 | -0.271400000 |
| C  | -4.169400000 | 2.122910000  | 0.110520000  |
| C  | -5.961970000 | 0.593100000  | -0.467020000 |
| C  | -5.498340000 | 1.897700000  | -0.276820000 |
| H  | -2.271490000 | 1.205710000  | 0.614620000  |
| H  | -5.461240000 | -1.507640000 | -0.417130000 |
| H  | -3.815950000 | 3.145130000  | 0.266470000  |
| H  | -6.997770000 | 0.416670000  | -0.765280000 |
| H  | -6.173620000 | 2.743800000  | -0.425500000 |

**TS1:** E= -1565.340600

|    |              |              |              |
|----|--------------|--------------|--------------|
| C  | -2.097177000 | 0.552107000  | -0.110541000 |
| C  | -1.309324000 | -0.404333000 | 0.091547000  |
| H  | -1.570459000 | -1.467958000 | 0.145185000  |
| Au | 0.798256000  | -0.234952000 | 0.341696000  |
| N  | -0.706875000 | 2.896288000  | 0.096971000  |
| H  | 0.028773000  | 2.613210000  | -0.553205000 |
| H  | -1.077802000 | 3.775873000  | -0.268313000 |
| C  | -0.139803000 | 3.108862000  | 1.434967000  |
| H  | 0.070730000  | 2.121910000  | 1.885333000  |
| H  | -0.910726000 | 3.571235000  | 2.073340000  |
| C  | 1.082715000  | 3.922652000  | 1.470516000  |
| C  | 2.092397000  | 4.594075000  | 1.467058000  |
| H  | 2.969648000  | 5.215907000  | 1.476171000  |
| P  | 3.120136000  | -0.152609000 | 0.635792000  |
| C  | 3.893926000  | -1.811866000 | 0.691692000  |
| H  | 3.698873000  | -2.346000000 | -0.249857000 |
| H  | 4.981505000  | -1.720133000 | 0.838465000  |
| H  | 3.464271000  | -2.394193000 | 1.519975000  |
| C  | 3.614848000  | 0.681874000  | 2.189287000  |
| H  | 4.712589000  | 0.702089000  | 2.276524000  |

|   |              |              |              |
|---|--------------|--------------|--------------|
| H | 3.229811000  | 1.713030000  | 2.192705000  |
| H | 3.193530000  | 0.143574000  | 3.051028000  |
| C | 3.985695000  | 0.753601000  | -0.700688000 |
| H | 3.626450000  | 1.792772000  | -0.731280000 |
| H | 5.072195000  | 0.751862000  | -0.520536000 |
| H | 3.778189000  | 0.278079000  | -1.670450000 |
| C | -3.229019000 | 1.440019000  | -0.406719000 |
| H | -2.980146000 | 2.064850000  | -1.280893000 |
| H | -3.420797000 | 2.113703000  | 0.451605000  |
| N | -4.323870000 | 0.544645000  | -0.734415000 |
| C | -5.357006000 | 0.576437000  | 0.022629000  |
| H | -5.411616000 | 1.263844000  | 0.892091000  |
| C | -6.542115000 | -0.255105000 | -0.196795000 |
| C | -7.634586000 | -0.138494000 | 0.682660000  |
| C | -6.611169000 | -1.165868000 | -1.270572000 |
| C | -8.775631000 | -0.920208000 | 0.497558000  |
| C | -7.751082000 | -1.943207000 | -1.452328000 |
| C | -8.834078000 | -1.822209000 | -0.569332000 |
| H | -7.586765000 | 0.569456000  | 1.515156000  |
| H | -5.760100000 | -1.241934000 | -1.949853000 |
| H | -9.620545000 | -0.825996000 | 1.183398000  |
| H | -7.804135000 | -2.647504000 | -2.285920000 |
| H | -9.727659000 | -2.433754000 | -0.716932000 |

**TS1:** E= -1208.384094

|    |              |              |              |
|----|--------------|--------------|--------------|
| C  | -0.373225000 | 0.050023000  | 0.721261000  |
| C  | 0.024378000  | -0.187590000 | 1.972923000  |
| C  | 2.351538000  | 0.364087000  | 1.101968000  |
| C  | 3.500559000  | 1.826892000  | -0.178062000 |
| C  | 4.157001000  | 2.955049000  | -0.689302000 |
| C  | 4.783039000  | 2.831541000  | -1.927850000 |
| C  | 4.763963000  | 1.618041000  | -2.646856000 |
| C  | 4.109625000  | 0.500069000  | -2.142133000 |
| C  | 3.463773000  | 0.604319000  | -0.898078000 |
| H  | 4.197459000  | 3.899764000  | -0.144749000 |
| H  | 5.307768000  | 3.693534000  | -2.345930000 |
| H  | 5.275824000  | 1.558053000  | -3.609636000 |
| H  | 4.100806000  | -0.444181000 | -2.691102000 |
| C  | -0.854576000 | -0.506616000 | 3.151793000  |
| H  | -1.911343000 | -0.562117000 | 2.860185000  |
| H  | -0.562669000 | -1.474550000 | 3.592892000  |
| H  | -0.760632000 | 0.238531000  | 3.957944000  |
| C  | 1.555346000  | -0.209687000 | 2.247934000  |
| H  | 1.843879000  | -1.273470000 | 2.323992000  |
| C  | 2.705973000  | -0.309137000 | -0.084140000 |
| N  | 2.810590000  | 1.654847000  | 1.025248000  |
| C  | 2.602040000  | 2.720215000  | 1.998184000  |
| H  | 1.532504000  | 2.833884000  | 2.232033000  |
| H  | 3.163750000  | 2.529266000  | 2.922589000  |
| H  | 2.943473000  | 3.666358000  | 1.563627000  |
| C  | 0.293932000  | 0.268931000  | -0.483885000 |
| H  | 0.391270000  | -0.542167000 | -1.213612000 |
| H  | 0.443241000  | 1.282603000  | -0.878561000 |
| O  | 1.874703000  | 0.349851000  | 3.503020000  |
| H  | 1.323413000  | 1.124827000  | 3.668157000  |
| Au | -2.367307000 | 0.143355000  | -0.044214000 |
| P  | -4.629852000 | 0.212577000  | -0.728604000 |
| C  | -5.005555000 | 1.580230000  | -1.890889000 |
| H  | -4.391258000 | 1.476567000  | -2.797413000 |
| H  | -6.070443000 | 1.564157000  | -2.171435000 |
| H  | -4.770390000 | 2.544828000  | -1.417519000 |
| C  | -5.795581000 | 0.435226000  | 0.669470000  |

|   |              |              |              |
|---|--------------|--------------|--------------|
| H | -6.833885000 | 0.462382000  | 0.303526000  |
| H | -5.685868000 | -0.396207000 | 1.381292000  |
| H | -5.572463000 | 1.376268000  | 1.193480000  |
| C | -5.184447000 | -1.313106000 | -1.580195000 |
| H | -5.058096000 | -2.178017000 | -0.912485000 |
| H | -6.244056000 | -1.228651000 | -1.868200000 |
| H | -4.575999000 | -1.476955000 | -2.481731000 |
| I | 2.662647000  | -2.395133000 | -0.383002000 |

**INT1:** E= -1208.435227

|    |              |              |              |
|----|--------------|--------------|--------------|
| C  | 0.797303000  | -0.493321000 | -1.085759000 |
| C  | -0.376592000 | -1.119698000 | -0.982976000 |
| H  | -0.368384000 | -2.132569000 | -1.410432000 |
| Au | -2.170112000 | -0.511434000 | -0.159322000 |
| N  | 0.974032000  | 0.873707000  | -0.517989000 |
| H  | 0.380264000  | 0.975411000  | 0.313542000  |
| H  | 1.990563000  | 0.878426000  | -0.242082000 |
| C  | 0.705342000  | 2.014204000  | -1.467482000 |
| H  | -0.334929000 | 1.905063000  | -1.810398000 |
| H  | 1.365651000  | 1.874445000  | -2.336819000 |
| C  | 0.935762000  | 3.301154000  | -0.826729000 |
| C  | 1.127583000  | 4.366227000  | -0.285583000 |
| H  | 1.299627000  | 5.318499000  | 0.185253000  |
| P  | -4.286689000 | 0.049395000  | 0.766955000  |
| C  | -5.215205000 | -1.411746000 | 1.379109000  |
| H  | -4.630697000 | -1.921335000 | 2.159349000  |
| H  | -6.188769000 | -1.108619000 | 1.794850000  |
| H  | -5.379305000 | -2.118890000 | 0.552534000  |
| C  | -5.433413000 | 0.861722000  | -0.415559000 |
| H  | -6.400873000 | 1.077502000  | 0.064225000  |
| H  | -4.991241000 | 1.802112000  | -0.776349000 |
| H  | -5.598321000 | 0.202550000  | -1.280726000 |
| C  | -4.225475000 | 1.189400000  | 2.206467000  |
| H  | -3.759741000 | 2.140534000  | 1.908678000  |
| H  | -5.238909000 | 1.389164000  | 2.588455000  |
| H  | -3.620267000 | 0.740840000  | 3.008172000  |
| C  | 2.116472000  | -0.963136000 | -1.675892000 |
| H  | 2.222720000  | -0.585407000 | -2.713197000 |
| H  | 2.116376000  | -2.065334000 | -1.740391000 |
| N  | 3.205030000  | -0.416443000 | -0.880328000 |
| C  | 4.262942000  | -1.106714000 | -0.679665000 |
| H  | 4.348161000  | -2.129306000 | -1.094955000 |
| C  | 5.426871000  | -0.648268000 | 0.084779000  |
| C  | 5.524793000  | 0.662082000  | 0.593714000  |
| C  | 6.481652000  | -1.552109000 | 0.311178000  |
| C  | 6.648022000  | 1.050444000  | 1.318298000  |
| C  | 7.606070000  | -1.161405000 | 1.039826000  |
| C  | 7.689584000  | 0.139307000  | 1.544594000  |
| H  | 4.717135000  | 1.371663000  | 0.404307000  |
| H  | 6.416286000  | -2.568959000 | -0.086212000 |
| H  | 6.721258000  | 2.068662000  | 1.707596000  |
| H  | 8.418672000  | -1.870553000 | 1.212367000  |
| H  | 8.570225000  | 0.448785000  | 2.112674000  |

**INT2:** E= -612.102573

|   |             |              |              |
|---|-------------|--------------|--------------|
| C | 2.354940000 | -1.396069000 | 0.031518000  |
| C | 3.088694000 | -2.265481000 | -0.696236000 |
| H | 2.782699000 | -3.309807000 | -0.768840000 |
| N | 2.659850000 | -0.067163000 | 0.249761000  |
| H | 4.010835000 | -1.980464000 | -1.204616000 |
| H | 1.847938000 | 0.506667000  | 0.461824000  |

|   |              |              |              |
|---|--------------|--------------|--------------|
| C | 3.720886000  | 0.579168000  | -0.493393000 |
| H | 3.590373000  | 0.458993000  | -1.591679000 |
| H | 4.684401000  | 0.090176000  | -0.255045000 |
| C | 3.820703000  | 2.005155000  | -0.177416000 |
| C | 3.896076000  | 3.187699000  | 0.071187000  |
| H | 3.967954000  | 4.235609000  | 0.293991000  |
| C | 1.101493000  | -1.839188000 | 0.769181000  |
| H | 1.345534000  | -1.890313000 | 1.847902000  |
| H | 0.817931000  | -2.856831000 | 0.440989000  |
| N | 0.030824000  | -0.874065000 | 0.619020000  |
| C | -1.121397000 | -1.275904000 | 0.259982000  |
| H | -1.316262000 | -2.349619000 | 0.054757000  |
| C | -2.283477000 | -0.384272000 | 0.086773000  |
| C | -2.199222000 | 0.995856000  | 0.349694000  |
| C | -3.505645000 | -0.921842000 | -0.350863000 |
| C | -3.312992000 | 1.814075000  | 0.174074000  |
| C | -4.621973000 | -0.100665000 | -0.527201000 |
| C | -4.527201000 | 1.268868000  | -0.265347000 |
| H | -1.247511000 | 1.405038000  | 0.693682000  |
| H | -3.578345000 | -1.994054000 | -0.555949000 |
| H | -3.239478000 | 2.884920000  | 0.380749000  |
| H | -5.567022000 | -0.530017000 | -0.869134000 |
| H | -5.399068000 | 1.913901000  | -0.401808000 |

**INT3:** E= -1208.452928

|    |              |              |              |
|----|--------------|--------------|--------------|
| C  | -4.359710000 | 0.911862000  | 0.156284000  |
| H  | -5.037381000 | 1.523213000  | 0.786766000  |
| N  | -3.378292000 | 1.445979000  | -0.457733000 |
| C  | -0.432768000 | 0.549021000  | -0.676939000 |
| C  | -0.477084000 | -0.487212000 | -0.004448000 |
| H  | -0.876312000 | -1.339770000 | 0.529303000  |
| C  | -4.686394000 | -0.523269000 | 0.098872000  |
| C  | -5.691464000 | -1.030544000 | 0.940534000  |
| C  | -4.026202000 | -1.401142000 | -0.782848000 |
| C  | -6.021457000 | -2.387681000 | 0.916324000  |
| C  | -4.359510000 | -2.754003000 | -0.809722000 |
| C  | -5.355541000 | -3.251337000 | 0.042408000  |
| H  | -6.217386000 | -0.354019000 | 1.620289000  |
| H  | -3.268088000 | -0.996582000 | -1.456048000 |
| H  | -6.803602000 | -2.770754000 | 1.575880000  |
| H  | -5.618414000 | -4.311718000 | 0.015658000  |
| C  | -3.181812000 | 2.881390000  | -0.322366000 |
| H  | -3.955906000 | 3.354671000  | 0.308740000  |
| H  | -3.258044000 | 3.333220000  | -1.329560000 |
| C  | -0.572341000 | 1.834678000  | -1.411474000 |
| H  | 0.279789000  | 1.966193000  | -2.096728000 |
| N  | -0.705804000 | 3.004188000  | -0.577796000 |
| H  | 0.168669000  | 3.307327000  | -0.159376000 |
| C  | -1.820460000 | 3.229870000  | 0.252010000  |
| C  | -1.696150000 | 3.813618000  | 1.456614000  |
| H  | -2.576361000 | 4.086000000  | 2.039483000  |
| H  | -3.853592000 | -3.427763000 | -1.506119000 |
| H  | -0.718912000 | 4.079111000  | 1.870745000  |
| H  | -1.467941000 | 1.698915000  | -2.037635000 |
| Au | 1.740846000  | -0.297486000 | -0.037689000 |
| P  | 4.052440000  | -0.558127000 | 0.206279000  |
| C  | 4.961066000  | -0.468207000 | -1.380602000 |
| H  | 4.591470000  | -1.244847000 | -2.066107000 |
| H  | 4.803702000  | 0.515770000  | -1.846138000 |
| H  | 6.038468000  | -0.618390000 | -1.208702000 |
| C  | 4.817204000  | 0.697266000  | 1.297111000  |
| H  | 4.660396000  | 1.702424000  | 0.879089000  |

|   |             |              |             |
|---|-------------|--------------|-------------|
| H | 4.355066000 | 0.655044000  | 2.294317000 |
| H | 5.898364000 | 0.509142000  | 1.390044000 |
| C | 4.477048000 | -2.181467000 | 0.938498000 |
| H | 5.569508000 | -2.273755000 | 1.042315000 |
| H | 4.010384000 | -2.276855000 | 1.929914000 |
| H | 4.104860000 | -2.991507000 | 0.294288000 |

**TS2:** E= -1208.444141

|    |              |              |              |
|----|--------------|--------------|--------------|
| C  | -4.395182000 | 0.350910000  | -0.377735000 |
| H  | -5.401880000 | 0.719086000  | -0.660559000 |
| N  | -3.410851000 | 1.159452000  | -0.303766000 |
| C  | -0.756107000 | 0.968127000  | -0.446863000 |
| C  | -0.414289000 | -0.204093000 | -0.172243000 |
| H  | -0.867540000 | -1.173776000 | 0.023320000  |
| C  | -4.311355000 | -1.092160000 | -0.094120000 |
| C  | -5.203919000 | -1.975608000 | -0.725790000 |
| C  | -3.388156000 | -1.601661000 | 0.838908000  |
| C  | -5.142175000 | -3.347026000 | -0.469331000 |
| C  | -3.339818000 | -2.970166000 | 1.106483000  |
| C  | -4.208594000 | -3.846685000 | 0.443762000  |
| H  | -5.944980000 | -1.586159000 | -1.429425000 |
| H  | -2.750746000 | -0.901934000 | 1.382822000  |
| H  | -5.832204000 | -4.026787000 | -0.974465000 |
| H  | -4.171594000 | -4.917836000 | 0.656344000  |
| C  | -3.660251000 | 2.581915000  | -0.518069000 |
| H  | -4.712288000 | 2.856306000  | -0.335297000 |
| H  | -3.453160000 | 2.828015000  | -1.576903000 |
| C  | -0.832484000 | 2.389122000  | -0.845598000 |
| H  | 0.201520000  | 2.695648000  | -1.085030000 |
| N  | -1.394780000 | 3.315790000  | 0.093514000  |
| H  | -0.769049000 | 3.648975000  | 0.817491000  |
| C  | -2.762851000 | 3.399356000  | 0.382023000  |
| C  | -3.251803000 | 4.147955000  | 1.385267000  |
| H  | -4.325318000 | 4.195759000  | 1.567385000  |
| H  | -2.638537000 | -3.357584000 | 1.850150000  |
| H  | -2.601782000 | 4.738145000  | 2.036798000  |
| H  | -1.362560000 | 2.427569000  | -1.810786000 |
| Au | 1.738167000  | -0.164445000 | -0.085248000 |
| P  | 4.059015000  | -0.401145000 | 0.074815000  |
| C  | 4.915949000  | -0.305413000 | -1.541265000 |
| H  | 4.532538000  | -1.088128000 | -2.212137000 |
| H  | 4.729526000  | 0.674658000  | -2.004248000 |
| H  | 6.000426000  | -0.441939000 | -1.406416000 |
| C  | 4.855717000  | 0.864160000  | 1.133482000  |
| H  | 4.671736000  | 1.866665000  | 0.720248000  |
| H  | 4.432873000  | 0.819484000  | 2.147857000  |
| H  | 5.941642000  | 0.687947000  | 1.185320000  |
| C  | 4.538894000  | -2.015598000 | 0.794848000  |
| H  | 5.635558000  | -2.094000000 | 0.857734000  |
| H  | 4.110578000  | -2.114334000 | 1.803113000  |
| H  | 4.152791000  | -2.832943000 | 0.168230000  |

**INT4:** E= -1208.480157

|   |              |              |              |
|---|--------------|--------------|--------------|
| C | -3.565933000 | 0.068419000  | -0.683512000 |
| H | -4.491734000 | 0.372240000  | -1.183682000 |
| N | -2.687718000 | 1.032741000  | -0.599168000 |
| C | -1.309387000 | 0.980265000  | -0.137894000 |
| C | -0.435125000 | 0.084569000  | -0.625525000 |
| H | -0.850724000 | -0.643184000 | -1.336042000 |
| C | -3.575613000 | -1.301884000 | -0.210921000 |
| C | -4.679813000 | -2.075470000 | -0.647423000 |

|    |              |              |              |
|----|--------------|--------------|--------------|
| C  | -2.656439000 | -1.882576000 | 0.696068000  |
| C  | -4.849799000 | -3.388210000 | -0.216676000 |
| C  | -2.848750000 | -3.184629000 | 1.142382000  |
| C  | -3.934482000 | -3.944449000 | 0.681694000  |
| H  | -5.410763000 | -1.634388000 | -1.330335000 |
| H  | -1.799720000 | -1.314170000 | 1.052655000  |
| H  | -5.700607000 | -3.973353000 | -0.571473000 |
| H  | -4.066367000 | -4.971984000 | 1.029150000  |
| C  | -3.088173000 | 2.418873000  | -0.954105000 |
| H  | -4.062075000 | 2.411511000  | -1.457293000 |
| H  | -2.329692000 | 2.799234000  | -1.657783000 |
| C  | -0.975269000 | 2.158296000  | 0.774058000  |
| H  | -0.431950000 | 1.772142000  | 1.649225000  |
| N  | -2.177993000 | 2.831638000  | 1.232442000  |
| H  | -2.075342000 | 3.410264000  | 2.058716000  |
| C  | -3.131373000 | 3.248630000  | 0.313519000  |
| C  | -4.036990000 | 4.226168000  | 0.489609000  |
| H  | -4.807799000 | 4.416714000  | -0.257688000 |
| H  | -2.142316000 | -3.620353000 | 1.852222000  |
| H  | -4.031850000 | 4.854863000  | 1.383035000  |
| H  | -0.275206000 | 2.838559000  | 0.245518000  |
| Au | 1.585289000  | -0.056564000 | -0.237676000 |
| P  | 3.917922000  | -0.277494000 | 0.138397000  |
| C  | 4.917093000  | 1.139280000  | -0.469451000 |
| H  | 4.760523000  | 1.264336000  | -1.551113000 |
| H  | 4.596484000  | 2.062592000  | 0.035311000  |
| H  | 5.988597000  | 0.974639000  | -0.275409000 |
| C  | 4.390311000  | -0.444417000 | 1.905914000  |
| H  | 4.058929000  | 0.444211000  | 2.463305000  |
| H  | 3.897997000  | -1.328099000 | 2.338180000  |
| H  | 5.481357000  | -0.550849000 | 2.010968000  |
| C  | 4.665233000  | -1.745714000 | -0.674070000 |
| H  | 5.746460000  | -1.797229000 | -0.471490000 |
| H  | 4.183404000  | -2.661114000 | -0.299859000 |
| H  | 4.502791000  | -1.689151000 | -1.760612000 |

**INT5:** E= -939.819795

|    |              |              |              |
|----|--------------|--------------|--------------|
| H  | 3.861920000  | -1.246692000 | -1.231810000 |
| N  | 3.498153000  | -1.275954000 | -0.267730000 |
| C  | 2.196739000  | -0.505842000 | -0.198973000 |
| C  | 1.038421000  | -1.163818000 | -0.150512000 |
| H  | 1.105101000  | -2.263419000 | -0.165581000 |
| C  | 4.545544000  | -0.695050000 | 0.649793000  |
| H  | 5.417981000  | -1.361048000 | 0.673723000  |
| H  | 4.087400000  | -0.670800000 | 1.650943000  |
| C  | 2.472341000  | 0.987567000  | -0.149850000 |
| H  | 1.786417000  | 1.495628000  | -0.842055000 |
| N  | 3.844358000  | 1.267980000  | -0.560582000 |
| H  | 4.014644000  | 2.214559000  | -0.883999000 |
| C  | 4.902104000  | 0.681618000  | 0.135106000  |
| C  | 6.131360000  | 1.198045000  | 0.295330000  |
| H  | 6.930843000  | 0.612251000  | 0.750510000  |
| H  | 6.369906000  | 2.213036000  | -0.029946000 |
| H  | 2.242940000  | 1.373124000  | 0.865085000  |
| Au | -0.867885000 | -0.373026000 | -0.040143000 |
| P  | -3.084199000 | 0.452524000  | 0.085432000  |
| C  | -3.446694000 | 1.400050000  | 1.616560000  |
| H  | -3.274395000 | 0.761278000  | 2.495452000  |
| H  | -2.774974000 | 2.268694000  | 1.682840000  |
| H  | -4.491071000 | 1.749446000  | 1.622311000  |
| C  | -3.541793000 | 1.590791000  | -1.281231000 |
| H  | -2.870757000 | 2.462406000  | -1.277136000 |

|   |              |              |              |
|---|--------------|--------------|--------------|
| H | -3.432204000 | 1.073236000  | -2.245723000 |
| H | -4.582058000 | 1.935056000  | -1.171443000 |
| C | -4.365217000 | -0.861662000 | 0.041308000  |
| H | -5.374241000 | -0.425071000 | 0.103143000  |
| H | -4.275373000 | -1.434804000 | -0.893319000 |
| H | -4.216717000 | -1.550855000 | 0.885692000  |
| H | 3.306121000  | -2.259201000 | -0.045848000 |

**INT6:** E= -343.490376

|   |              |              |              |
|---|--------------|--------------|--------------|
| N | 0.665073000  | 1.162069000  | -0.169188000 |
| C | 1.462095000  | 0.040657000  | -0.037205000 |
| C | 2.793429000  | 0.004714000  | -0.250657000 |
| H | 3.358733000  | 0.906676000  | -0.499951000 |
| C | -0.673802000 | 1.184742000  | 0.389971000  |
| H | -1.194157000 | 2.089285000  | 0.047280000  |
| H | -0.660515000 | 1.226121000  | 1.502088000  |
| C | 0.673617000  | -1.184480000 | 0.390568000  |
| H | 1.194200000  | -2.089237000 | 0.048858000  |
| N | -0.664801000 | -1.161926000 | -0.169786000 |
| H | -1.133422000 | -2.051221000 | -0.290595000 |
| C | -1.462011000 | -0.040671000 | -0.037562000 |
| C | -2.793465000 | -0.005128000 | -0.250328000 |
| H | -3.341149000 | 0.935712000  | -0.188527000 |
| H | -3.358585000 | -0.907353000 | -0.499096000 |
| H | 0.659278000  | -1.225095000 | 1.502696000  |
| H | 3.340878000  | -0.936248000 | -0.188574000 |
| H | 1.133656000  | 2.051359000  | -0.290077000 |

**INT7:** E= -343.500740

|   |              |              |              |
|---|--------------|--------------|--------------|
| N | -0.758910000 | -1.202076000 | -0.121913000 |
| C | -1.388408000 | 0.068805000  | 0.003547000  |
| C | 0.656963000  | -1.196180000 | 0.004182000  |
| H | 1.136886000  | -2.176416000 | 0.014179000  |
| C | -0.657021000 | 1.196198000  | 0.003700000  |
| H | -1.136822000 | 2.176493000  | 0.014404000  |
| N | 0.758933000  | 1.202000000  | -0.121601000 |
| H | 1.210143000  | 1.925209000  | 0.436746000  |
| C | 1.388414000  | -0.068874000 | 0.003773000  |
| H | -1.210079000 | -1.925194000 | 0.436602000  |
| C | -2.884594000 | 0.040749000  | 0.036187000  |
| H | -3.288244000 | -0.447852000 | -0.868795000 |
| H | -3.253355000 | -0.541365000 | 0.902161000  |
| H | -3.305970000 | 1.053270000  | 0.106180000  |
| C | 2.884600000  | -0.040672000 | 0.036015000  |
| H | 3.253487000  | 0.541878000  | 0.901638000  |
| H | 3.306069000  | -1.053123000 | 0.106407000  |
| H | 3.287994000  | 0.447481000  | -0.869343000 |

**TS3:** E= -1284.838512

|   |             |              |              |
|---|-------------|--------------|--------------|
| C | 2.727092000 | -2.123387000 | -1.010639000 |
| C | 3.325168000 | -0.866948000 | -0.935417000 |
| N | 3.946809000 | -0.490780000 | 0.275872000  |
| C | 3.699805000 | -1.209596000 | 1.444404000  |
| C | 2.986867000 | -2.353581000 | 1.380786000  |
| N | 2.488678000 | -2.791710000 | 0.126914000  |
| H | 3.736254000 | -0.419903000 | -1.841039000 |
| H | 2.799294000 | -2.998402000 | 2.235326000  |
| C | 4.299770000 | -0.670491000 | 2.702893000  |
| H | 3.918190000 | 0.344924000  | 2.908556000  |
| H | 4.066980000 | -1.309731000 | 3.564190000  |



|    |              |              |              |
|----|--------------|--------------|--------------|
| H  | 5.395991000  | -0.594292000 | 2.607123000  |
| C  | 2.219444000  | -2.700831000 | -2.292361000 |
| H  | 2.544438000  | -2.107102000 | -3.155553000 |
| H  | 2.583990000  | -3.732213000 | -2.424291000 |
| H  | 1.116612000  | -2.727516000 | -2.276731000 |
| H  | 4.193220000  | 0.488912000  | 0.376578000  |
| H  | 1.928048000  | -3.635731000 | 0.095092000  |
| C  | 1.292004000  | 0.133597000  | -1.116439000 |
| H  | 1.254643000  | 0.005201000  | -2.214990000 |
| C  | 1.791153000  | 1.441538000  | -0.674264000 |
| C  | 1.743054000  | 1.818867000  | 0.683605000  |
| C  | 2.359531000  | 2.335366000  | -1.607174000 |
| C  | 2.227386000  | 3.065545000  | 1.088993000  |
| C  | 2.846970000  | 3.574971000  | -1.198094000 |
| C  | 2.780448000  | 3.945706000  | 0.152607000  |
| H  | 1.304111000  | 1.128745000  | 1.407541000  |
| H  | 2.400636000  | 2.057096000  | -2.664811000 |
| H  | 2.173236000  | 3.354333000  | 2.141864000  |
| H  | 3.272757000  | 4.262507000  | -1.932870000 |
| H  | 3.158108000  | 4.920060000  | 0.471510000  |
| O  | 0.480781000  | -0.577839000 | -0.390772000 |
| Au | -1.542972000 | -0.223626000 | -0.080307000 |
| P  | -3.765622000 | 0.110330000  | 0.292007000  |
| C  | -4.414265000 | 1.608067000  | -0.540652000 |
| H  | -5.488265000 | 1.728964000  | -0.329116000 |
| H  | -3.871340000 | 2.495264000  | -0.183145000 |
| H  | -4.265261000 | 1.522234000  | -1.626942000 |
| C  | -4.189618000 | 0.324928000  | 2.061895000  |
| H  | -3.645694000 | 1.189561000  | 2.469584000  |
| H  | -5.272393000 | 0.487999000  | 2.179628000  |
| H  | -3.894006000 | -0.571487000 | 2.626411000  |
| C  | -4.828446000 | -1.263186000 | -0.293199000 |
| H  | -4.547351000 | -2.194393000 | 0.220076000  |
| H  | -5.888070000 | -1.042219000 | -0.089998000 |
| H  | -4.687866000 | -1.404510000 | -1.374829000 |

**INT8:** E= -1284.859377

|   |             |              |              |
|---|-------------|--------------|--------------|
| C | 2.881652000 | -1.690003000 | -1.050614000 |
| C | 2.720101000 | -0.389238000 | -0.289216000 |
| N | 2.147393000 | -0.693015000 | 1.020648000  |
| C | 2.459887000 | -1.809433000 | 1.723501000  |
| C | 3.009290000 | -2.867954000 | 1.053445000  |
| N | 3.076229000 | -2.771313000 | -0.345769000 |
| H | 3.741347000 | 0.045151000  | -0.185180000 |
| H | 3.289731000 | -3.816407000 | 1.500561000  |
| C | 2.139583000 | -1.846700000 | 3.186480000  |
| H | 1.067778000 | -1.643308000 | 3.347218000  |
| H | 2.374128000 | -2.826316000 | 3.621575000  |
| H | 2.708314000 | -1.074267000 | 3.729194000  |
| C | 2.900035000 | -1.741700000 | -2.533774000 |
| H | 3.674279000 | -1.060192000 | -2.926383000 |
| H | 3.090937000 | -2.755833000 | -2.913103000 |
| H | 1.928297000 | -1.372522000 | -2.900853000 |
| H | 1.646595000 | 0.063236000  | 1.477723000  |
| H | 3.240653000 | -3.639703000 | -0.856354000 |
| C | 1.829877000 | 0.621764000  | -1.079733000 |
| H | 2.435583000 | 0.864222000  | -1.982159000 |
| C | 1.669229000 | 1.962019000  | -0.343782000 |
| C | 0.607204000 | 2.801048000  | -0.722322000 |
| C | 2.568633000 | 2.430972000  | 0.629748000  |
| C | 0.441425000 | 4.059262000  | -0.139115000 |
| C | 2.400433000 | 3.689441000  | 1.219462000  |

|    |              |              |              |
|----|--------------|--------------|--------------|
| C  | 1.334796000  | 4.507296000  | 0.839094000  |
| H  | -0.081029000 | 2.463465000  | -1.499233000 |
| H  | 3.426648000  | 1.828733000  | 0.940426000  |
| H  | -0.385663000 | 4.698771000  | -0.458006000 |
| H  | 3.111826000  | 4.031082000  | 1.975480000  |
| H  | 1.206284000  | 5.491608000  | 1.295493000  |
| O  | 0.662725000  | 0.025035000  | -1.498558000 |
| Au | -1.103097000 | -0.186175000 | -0.484961000 |
| P  | -3.175092000 | -0.444407000 | 0.430469000  |
| C  | -4.180401000 | 1.089749000  | 0.397162000  |
| H  | -5.171121000 | 0.915147000  | 0.845312000  |
| H  | -3.662467000 | 1.882842000  | 0.956323000  |
| H  | -4.305553000 | 1.424316000  | -0.643132000 |
| C  | -3.183680000 | -0.959448000 | 2.192176000  |
| H  | -2.650384000 | -0.211737000 | 2.797509000  |
| H  | -4.216272000 | -1.053354000 | 2.563427000  |
| H  | -2.672130000 | -1.927451000 | 2.297632000  |
| C  | -4.207351000 | -1.697078000 | -0.424118000 |
| H  | -3.711148000 | -2.677653000 | -0.380297000 |
| H  | -5.200353000 | -1.769988000 | 0.046455000  |
| H  | -4.326658000 | -1.415876000 | -1.480777000 |

**INT9:** E= -1284.857085

|    |              |              |              |
|----|--------------|--------------|--------------|
| C  | 3.463400000  | -1.556483000 | -0.527749000 |
| C  | 3.012193000  | -0.303951000 | 0.246964000  |
| N  | 2.285574000  | -0.734713000 | 1.429962000  |
| C  | 1.562194000  | -1.905147000 | 1.445730000  |
| C  | 1.724484000  | -2.787093000 | 0.413146000  |
| N  | 2.773914000  | -2.643103000 | -0.485024000 |
| H  | 3.903081000  | 0.268227000  | 0.552706000  |
| H  | 1.149321000  | -3.712547000 | 0.359496000  |
| C  | 0.698531000  | -2.155129000 | 2.644643000  |
| H  | -0.037537000 | -1.345981000 | 2.790511000  |
| H  | 0.166484000  | -3.111188000 | 2.550096000  |
| H  | 1.311434000  | -2.205107000 | 3.562190000  |
| C  | 4.742634000  | -1.486361000 | -1.311287000 |
| H  | 5.603945000  | -1.384448000 | -0.626705000 |
| H  | 4.870644000  | -2.407557000 | -1.894297000 |
| H  | 4.778317000  | -0.618033000 | -1.991579000 |
| H  | 2.422285000  | -0.236651000 | 2.301005000  |
| C  | 2.208354000  | 0.621724000  | -0.704594000 |
| H  | 2.867842000  | 0.850620000  | -1.561358000 |
| C  | 1.681524000  | 1.931239000  | -0.153920000 |
| C  | 0.768923000  | 2.674124000  | -0.927231000 |
| C  | 2.125434000  | 2.475176000  | 1.061391000  |
| C  | 0.295294000  | 3.911077000  | -0.483322000 |
| C  | 1.655478000  | 3.716254000  | 1.502601000  |
| C  | 0.734715000  | 4.434498000  | 0.736601000  |
| H  | 0.447464000  | 2.293328000  | -1.899629000 |
| H  | 2.861314000  | 1.952647000  | 1.674404000  |
| H  | -0.404183000 | 4.477331000  | -1.103151000 |
| H  | 2.017987000  | 4.124718000  | 2.448822000  |
| H  | 0.373259000  | 5.406235000  | 1.081055000  |
| O  | 1.085678000  | -0.123497000 | -1.278661000 |
| Au | -0.949158000 | -0.235582000 | -0.492447000 |
| P  | -3.126408000 | -0.386420000 | 0.154786000  |
| C  | -3.472686000 | 0.508587000  | 1.713062000  |
| H  | -4.539329000 | 0.417399000  | 1.971814000  |
| H  | -2.865425000 | 0.087898000  | 2.527776000  |
| H  | -3.215766000 | 1.571451000  | 1.596061000  |
| C  | -3.669379000 | -2.111028000 | 0.432588000  |
| H  | -3.054004000 | -2.574074000 | 1.217454000  |

|   |              |              |              |
|---|--------------|--------------|--------------|
| H | -4.726734000 | -2.129865000 | 0.740114000  |
| H | -3.550190000 | -2.690932000 | -0.494261000 |
| C | -4.279058000 | 0.306354000  | -1.085819000 |
| H | -4.168885000 | -0.233121000 | -2.037845000 |
| H | -5.317478000 | 0.210041000  | -0.731598000 |
| H | -4.049503000 | 1.368481000  | -1.254731000 |
| H | 1.421188000  | -0.981996000 | -1.598918000 |

**INT10:** E= -688.508967

|   |              |              |              |
|---|--------------|--------------|--------------|
| C | 2.262806000  | -1.128232000 | -0.206148000 |
| C | 0.829763000  | -0.685478000 | -0.528758000 |
| N | 0.875100000  | 0.709750000  | -0.929851000 |
| C | 1.793426000  | 1.577279000  | -0.387297000 |
| C | 2.911784000  | 1.064254000  | 0.200932000  |
| N | 3.169712000  | -0.301267000 | 0.181477000  |
| H | 0.447162000  | -1.289308000 | -1.371800000 |
| H | 3.683903000  | 1.711970000  | 0.618432000  |
| C | 1.525655000  | 3.041900000  | -0.551247000 |
| H | 0.593434000  | 3.333791000  | -0.037059000 |
| H | 2.350563000  | 3.640580000  | -0.142592000 |
| H | 1.406292000  | 3.302422000  | -1.617823000 |
| C | 2.584366000  | -2.590603000 | -0.345151000 |
| H | 2.469442000  | -2.917551000 | -1.394735000 |
| H | 3.620398000  | -2.769821000 | -0.028652000 |
| H | 1.910898000  | -3.226350000 | 0.256242000  |
| H | 0.024606000  | 1.100029000  | -1.318198000 |
| C | -0.134736000 | -0.957339000 | 0.679896000  |
| H | -0.147424000 | -2.057670000 | 0.828852000  |
| C | -1.549080000 | -0.516150000 | 0.358157000  |
| C | -2.052326000 | 0.700908000  | 0.840936000  |
| C | -2.361342000 | -1.300243000 | -0.476973000 |
| C | -3.337551000 | 1.126496000  | 0.488199000  |
| C | -3.643402000 | -0.874193000 | -0.831693000 |
| C | -4.135672000 | 0.343980000  | -0.350761000 |
| H | -1.430374000 | 1.294411000  | 1.512399000  |
| H | -1.990750000 | -2.261184000 | -0.847652000 |
| H | -3.719616000 | 2.074271000  | 0.877273000  |
| H | -4.264093000 | -1.499315000 | -1.479031000 |
| H | -5.140706000 | 0.676457000  | -0.622959000 |
| O | 0.305773000  | -0.297272000 | 1.843525000  |
| H | 1.264252000  | -0.409416000 | 1.917170000  |

**INT11:** E= -612.198029

|   |              |              |              |
|---|--------------|--------------|--------------|
| C | -2.122053000 | -1.341155000 | 0.091299000  |
| C | -0.874923000 | -0.553906000 | 0.043453000  |
| N | -1.095900000 | 0.819716000  | -0.086114000 |
| C | -2.341428000 | 1.395471000  | -0.148252000 |
| C | -3.427001000 | 0.572968000  | -0.066230000 |
| N | -3.298718000 | -0.792393000 | 0.044872000  |
| H | -4.440598000 | 0.979115000  | -0.086338000 |
| C | -2.401600000 | 2.885158000  | -0.292270000 |
| H | -1.891862000 | 3.217956000  | -1.213370000 |
| H | -3.443987000 | 3.227375000  | -0.336316000 |
| H | -1.908490000 | 3.388954000  | 0.557085000  |
| C | -2.042488000 | -2.838224000 | 0.202995000  |
| H | -1.491430000 | -3.144557000 | 1.107978000  |
| H | -3.060851000 | -3.244122000 | 0.243588000  |
| H | -1.512917000 | -3.278487000 | -0.659091000 |
| H | -0.283337000 | 1.405645000  | -0.244636000 |
| C | 0.377159000  | -1.116610000 | 0.084424000  |
| H | 0.408215000  | -2.205604000 | 0.065224000  |

|   |             |              |              |
|---|-------------|--------------|--------------|
| C | 1.683208000 | -0.462898000 | 0.066786000  |
| C | 2.797147000 | -1.184714000 | -0.429782000 |
| C | 1.938601000 | 0.844869000  | 0.549293000  |
| C | 4.071831000 | -0.626844000 | -0.476210000 |
| C | 3.219112000 | 1.402968000  | 0.502116000  |
| C | 4.293516000 | 0.678694000  | -0.019187000 |
| H | 2.640919000 | -2.204245000 | -0.793371000 |
| H | 1.144884000 | 1.416553000  | 1.035802000  |
| H | 4.903652000 | -1.214828000 | -0.873856000 |
| H | 3.378674000 | 2.411787000  | 0.893227000  |
| H | 5.292955000 | 1.118535000  | -0.057838000 |

**2-Ph:** E= -612.218751

|   |              |              |              |
|---|--------------|--------------|--------------|
| C | -2.288397000 | -1.088234000 | 0.000033000  |
| C | -0.979307000 | -0.533832000 | -0.000354000 |
| N | -0.797349000 | 0.783879000  | -0.000424000 |
| C | -1.868843000 | 1.592828000  | -0.000014000 |
| C | -3.152766000 | 1.036236000  | 0.000687000  |
| N | -3.353832000 | -0.284388000 | 0.000642000  |
| H | -4.040107000 | 1.679484000  | 0.001299000  |
| C | -1.630046000 | 3.077843000  | -0.000209000 |
| H | -1.043443000 | 3.372838000  | -0.885360000 |
| H | -2.573685000 | 3.641418000  | -0.000711000 |
| H | -1.044244000 | 3.373284000  | 0.885342000  |
| C | -2.524381000 | -2.574468000 | -0.000252000 |
| H | -2.075602000 | -3.056802000 | 0.884070000  |
| H | -3.604057000 | -2.773422000 | 0.000140000  |
| H | -2.076407000 | -3.056211000 | -0.885311000 |
| C | 0.237335000  | -1.447781000 | -0.000648000 |
| H | 0.165403000  | -2.115440000 | 0.875523000  |
| H | 0.165509000  | -2.114707000 | -0.877390000 |
| C | 1.578285000  | -0.750758000 | -0.000285000 |
| C | 2.216270000  | -0.418465000 | -1.205640000 |
| C | 2.215991000  | -0.419305000 | 1.205504000  |
| C | 3.456327000  | 0.227852000  | -1.208102000 |
| C | 3.456011000  | 0.226995000  | 1.208731000  |
| C | 4.081012000  | 0.553333000  | 0.000489000  |
| H | 1.736449000  | -0.671451000 | -2.155621000 |
| H | 1.735889000  | -0.673010000 | 2.155149000  |
| H | 3.938046000  | 0.475132000  | -2.157912000 |
| H | 3.937546000  | 0.473621000  | 2.158803000  |
| H | 5.052018000  | 1.055367000  | 0.000814000  |

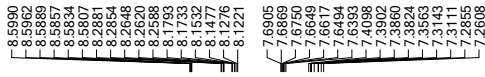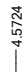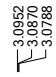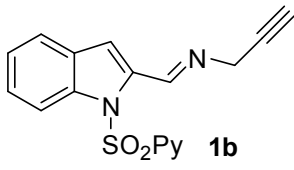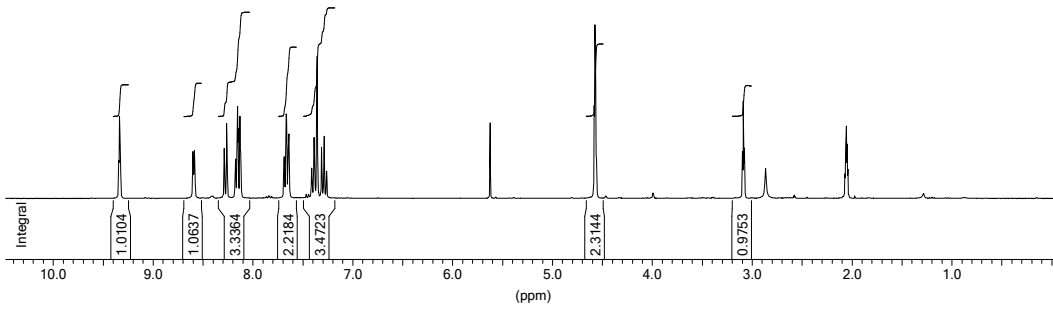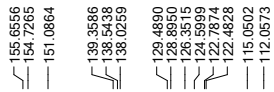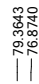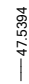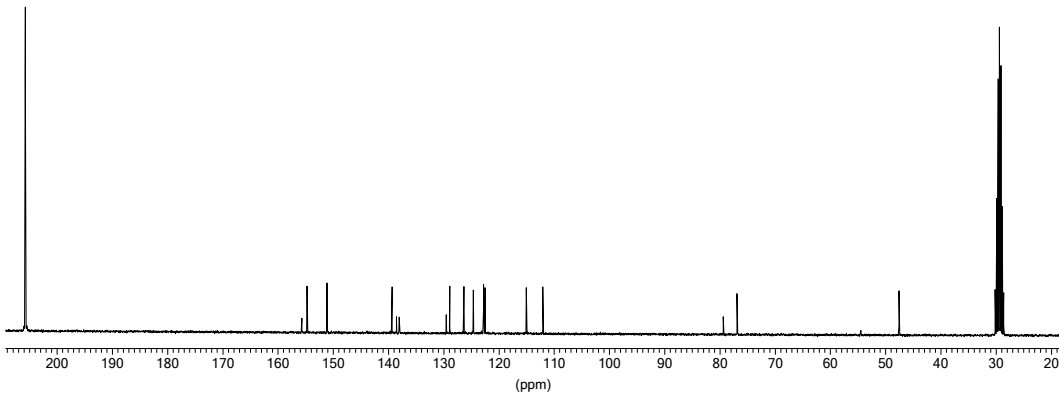

8.6345  
8.6337  
8.4521  
8.4270  
8.4242  
8.1279  
7.7960  
7.7933  
7.688  
7.4266  
7.4261  
7.3987  
7.3717

4.3254

2.8738  
2.8656  
2.8573

1.5877

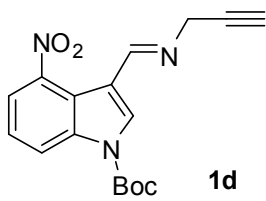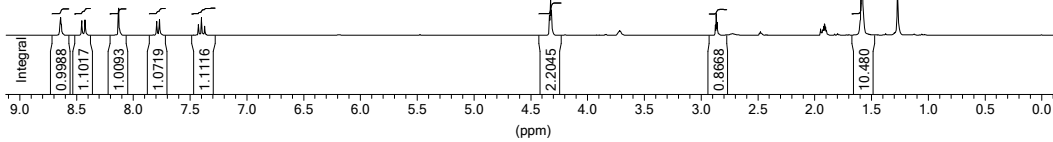

156.8528  
149.7247  
144.3787  
138.8727  
132.0645  
125.6066  
121.7751  
121.0831  
120.9105  
118.2197  
87.0116  
80.4319  
77.3400  
47.9977  
28.5251

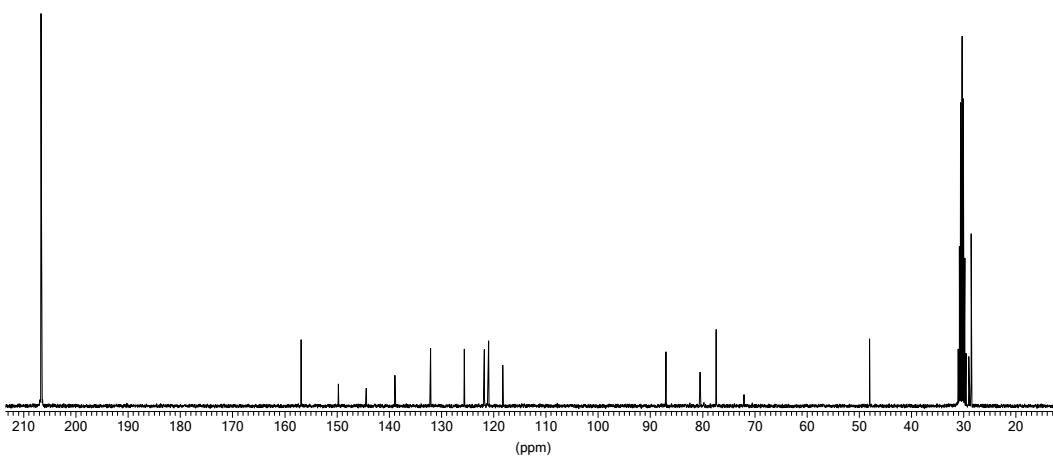

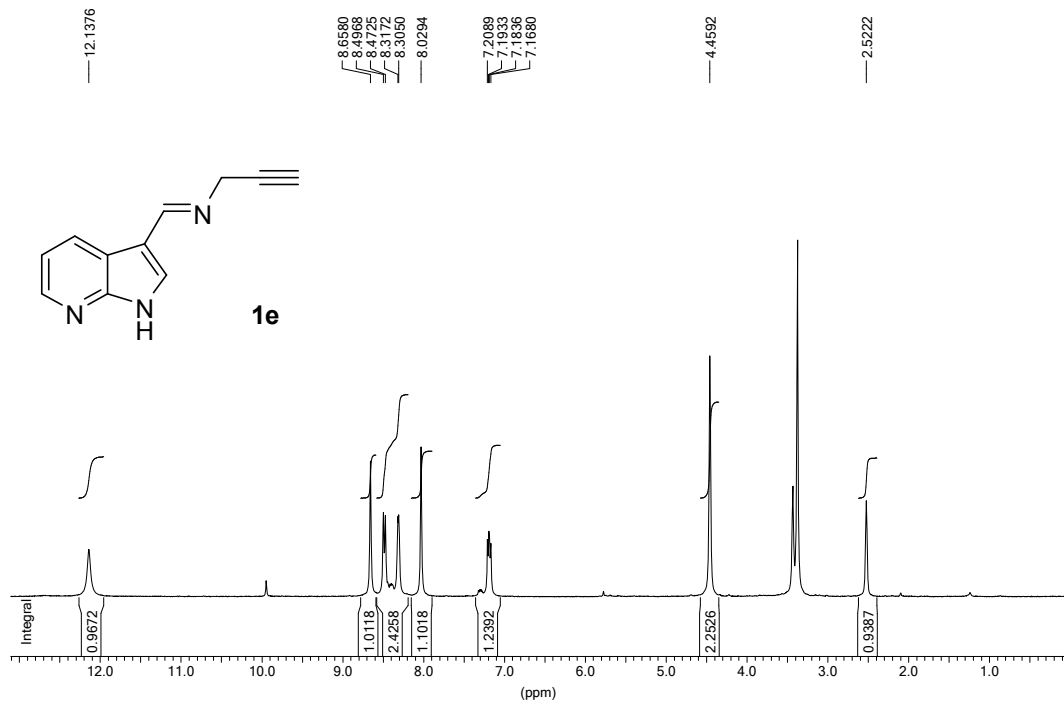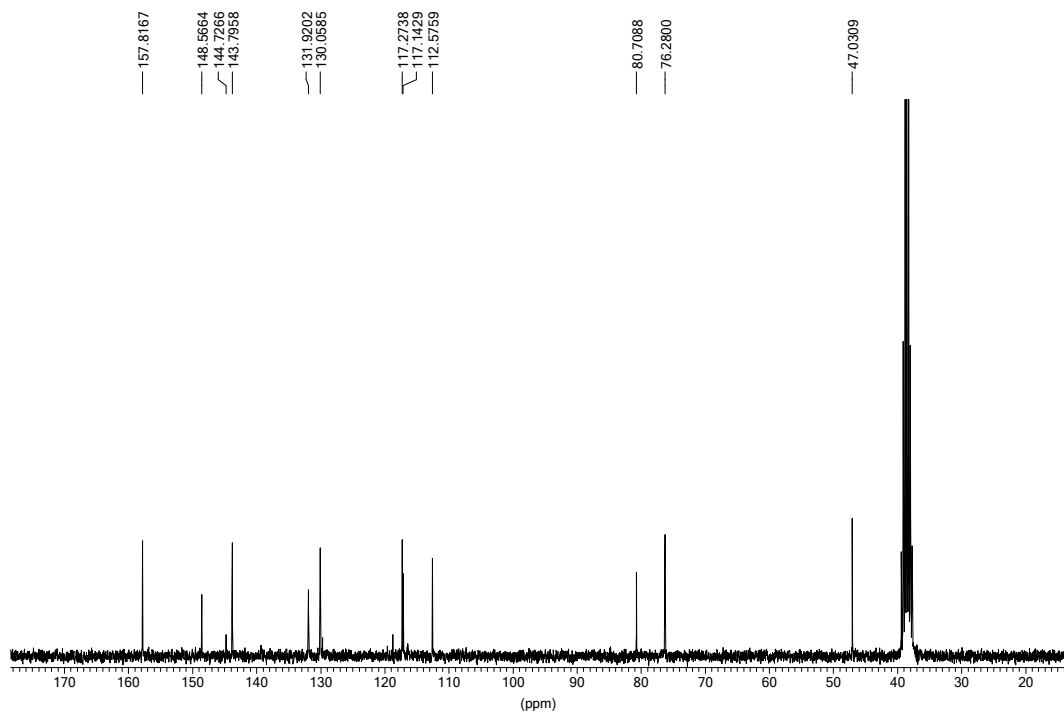

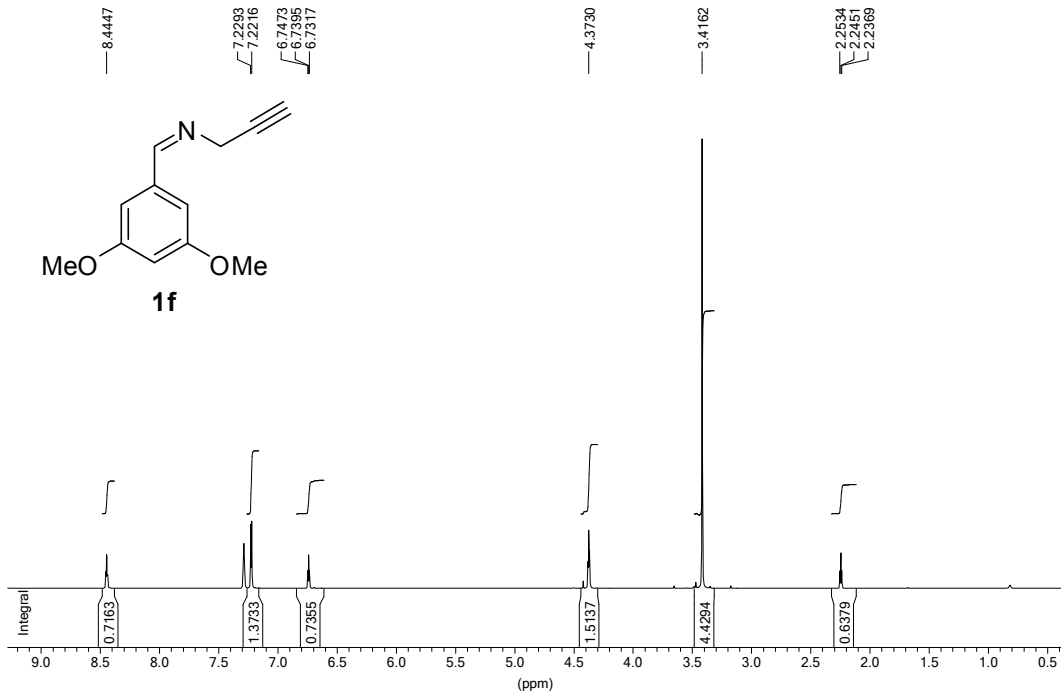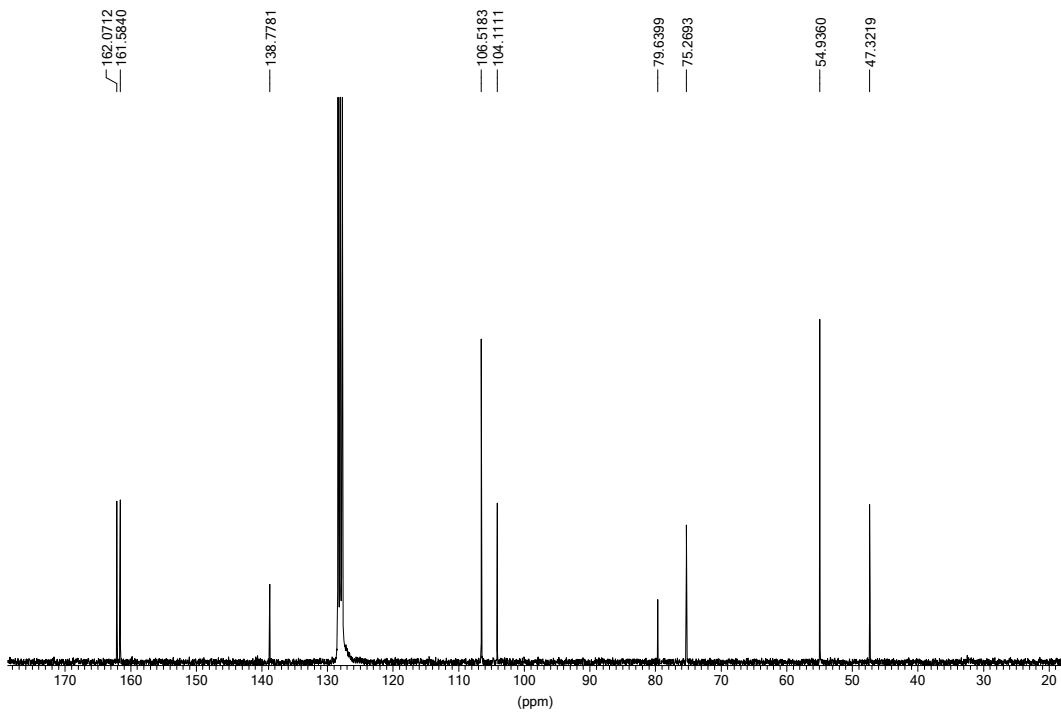



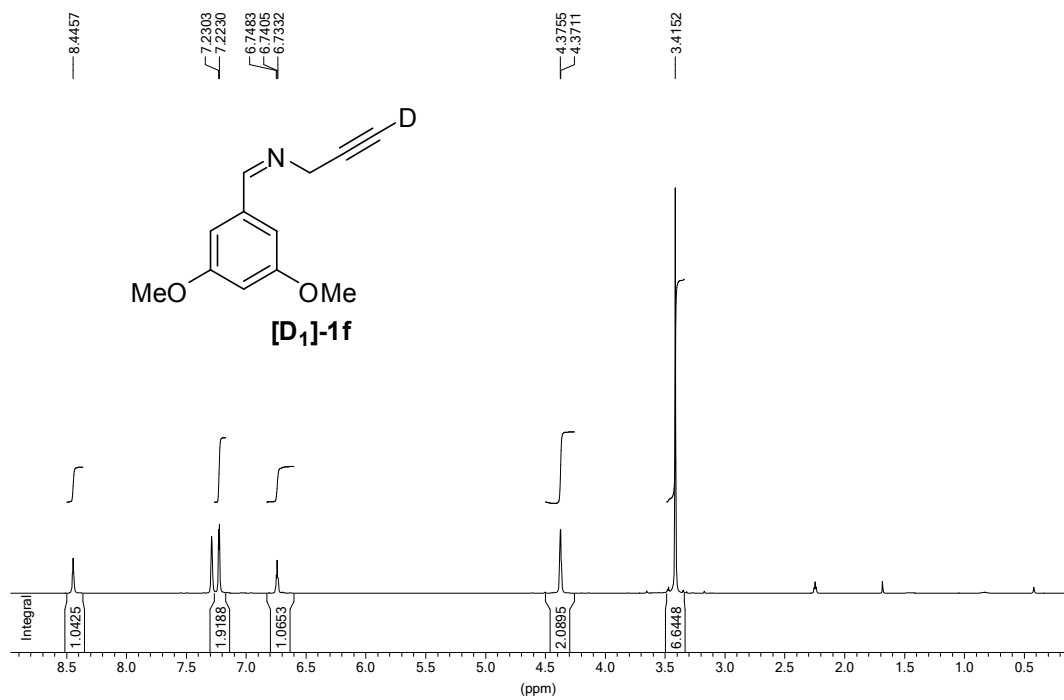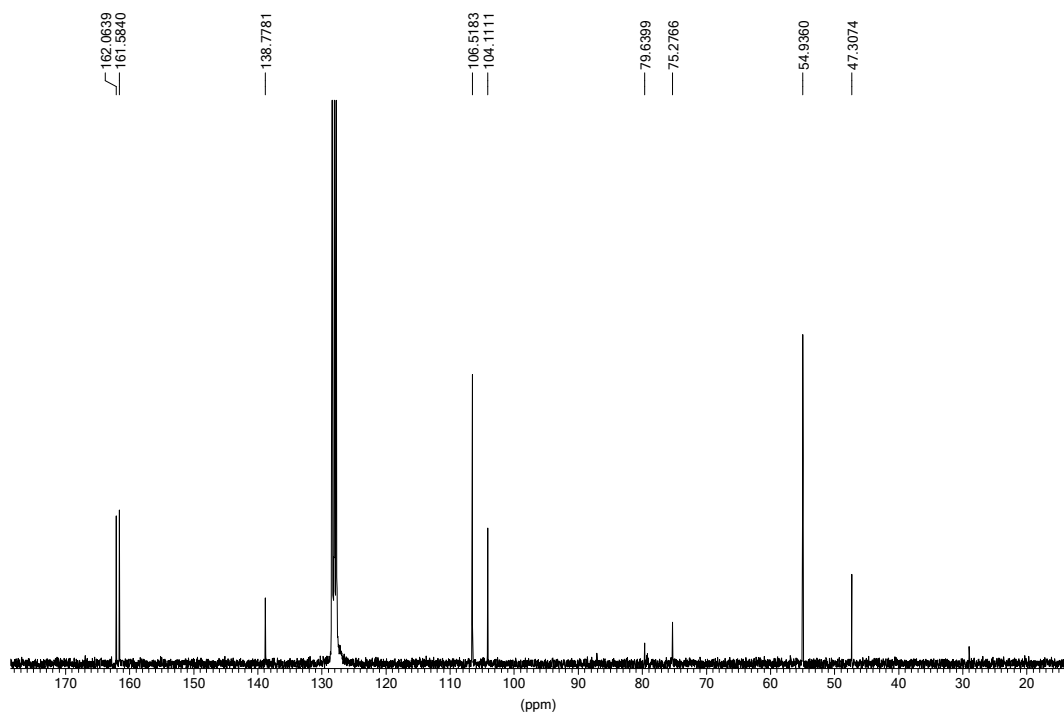

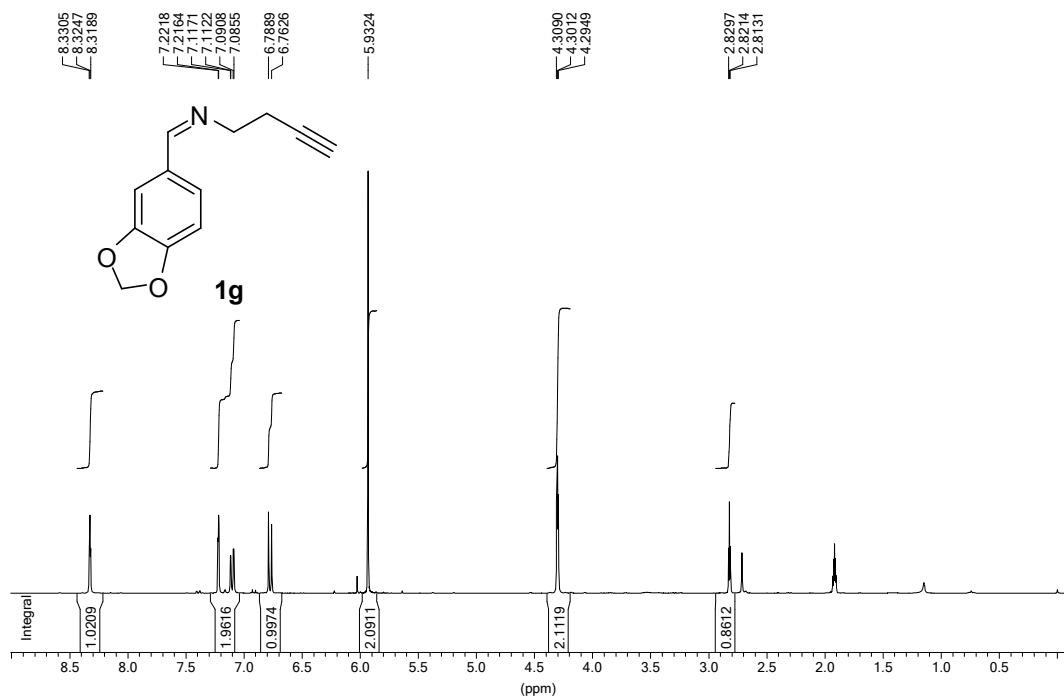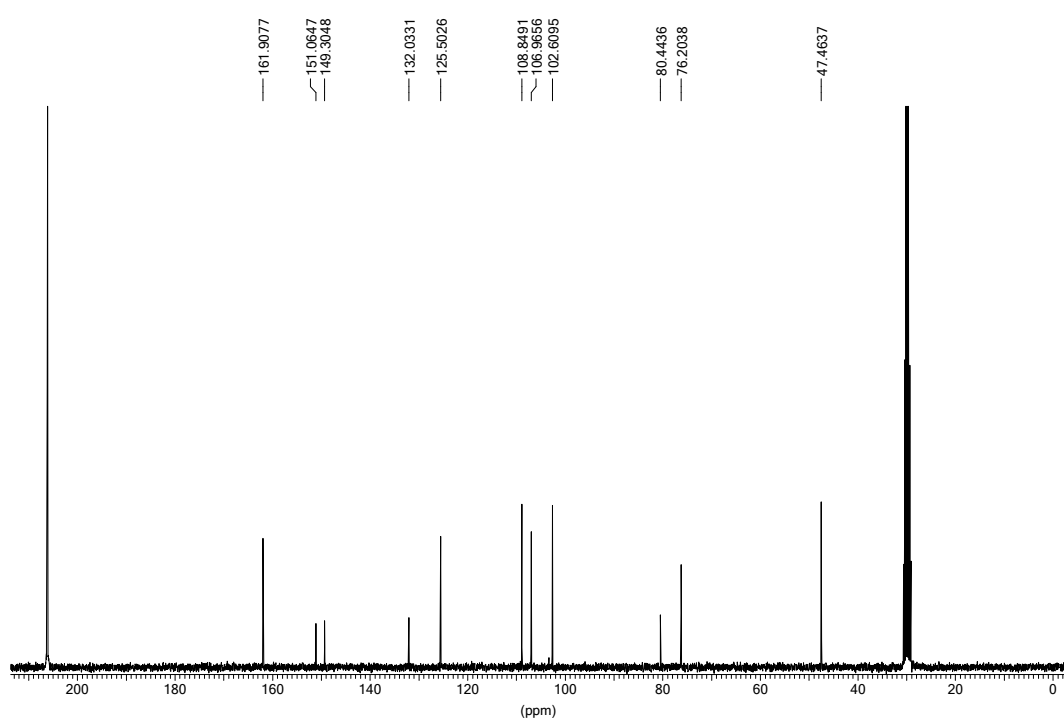

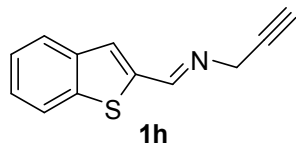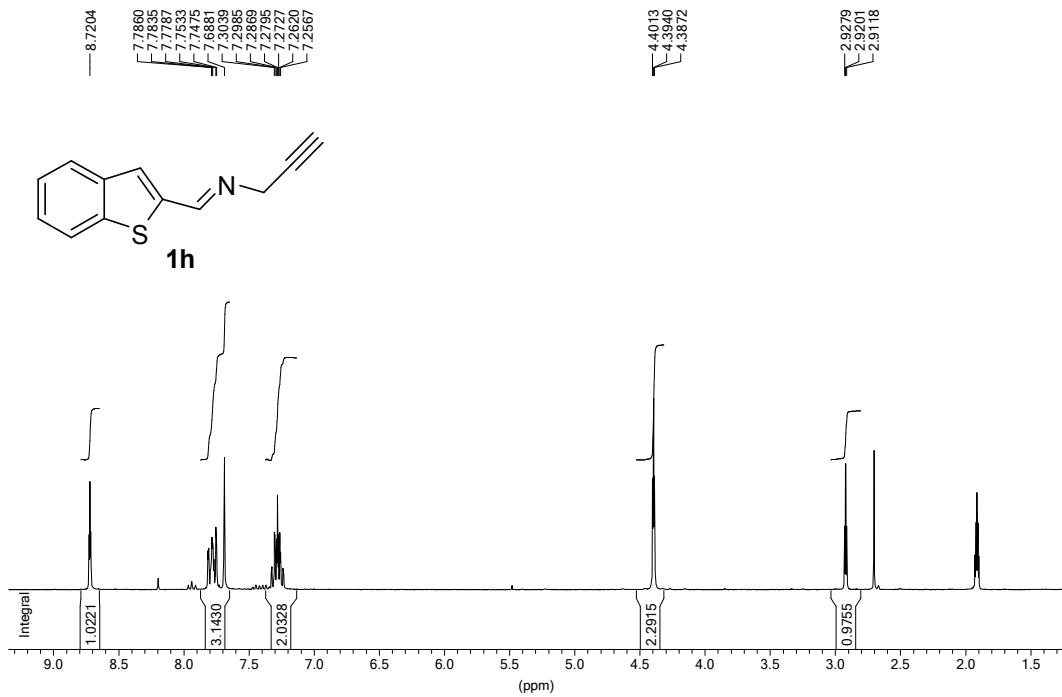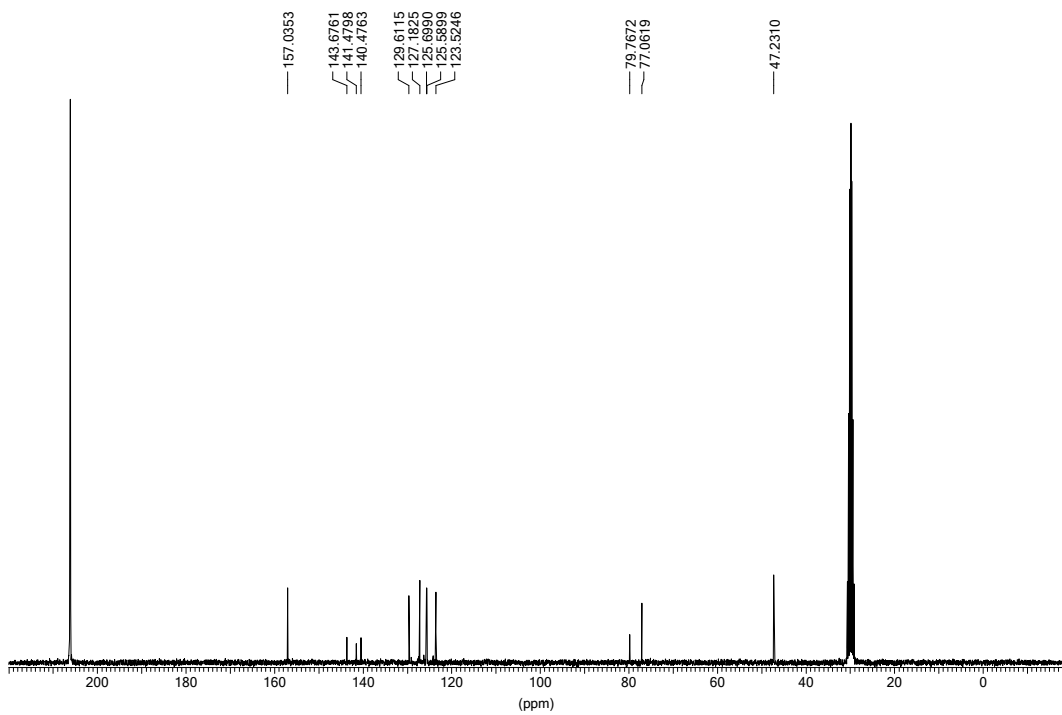

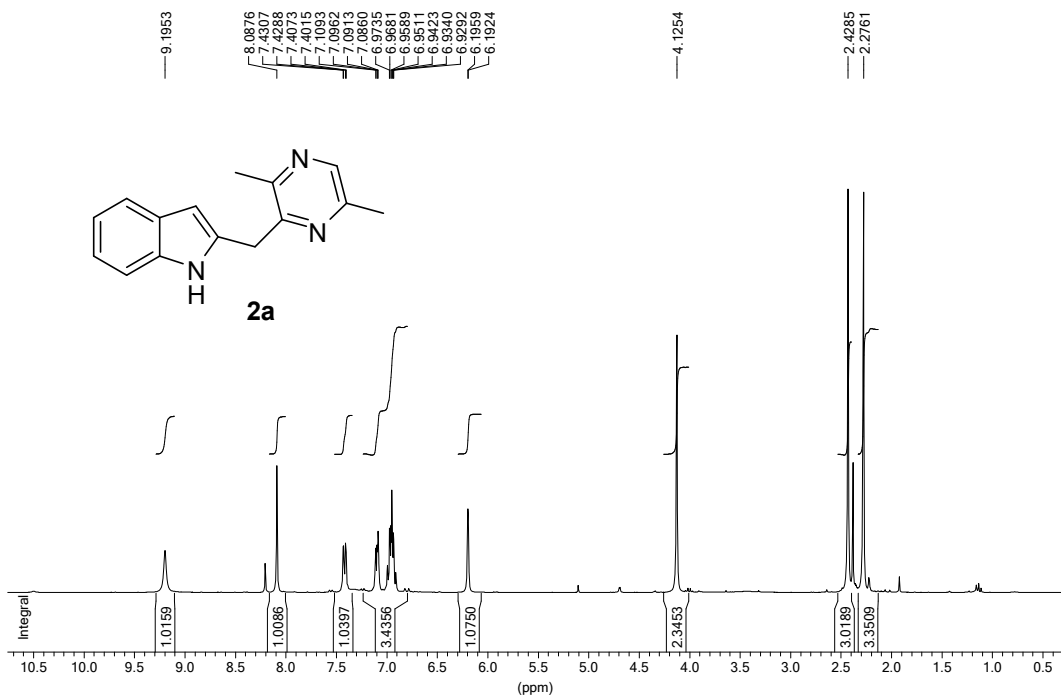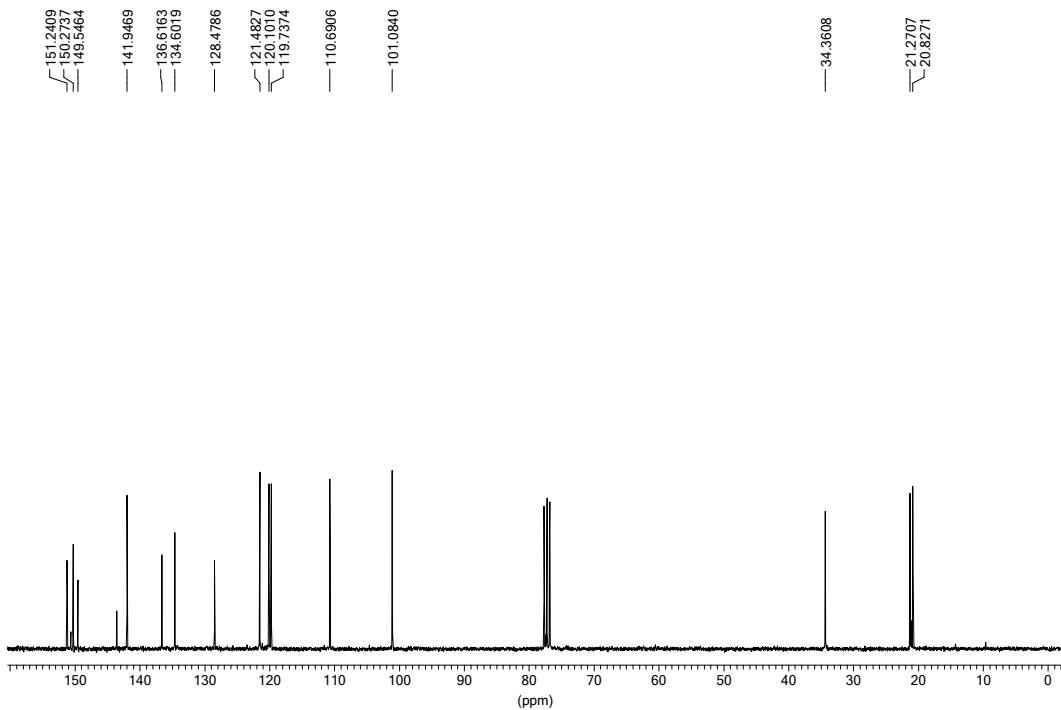

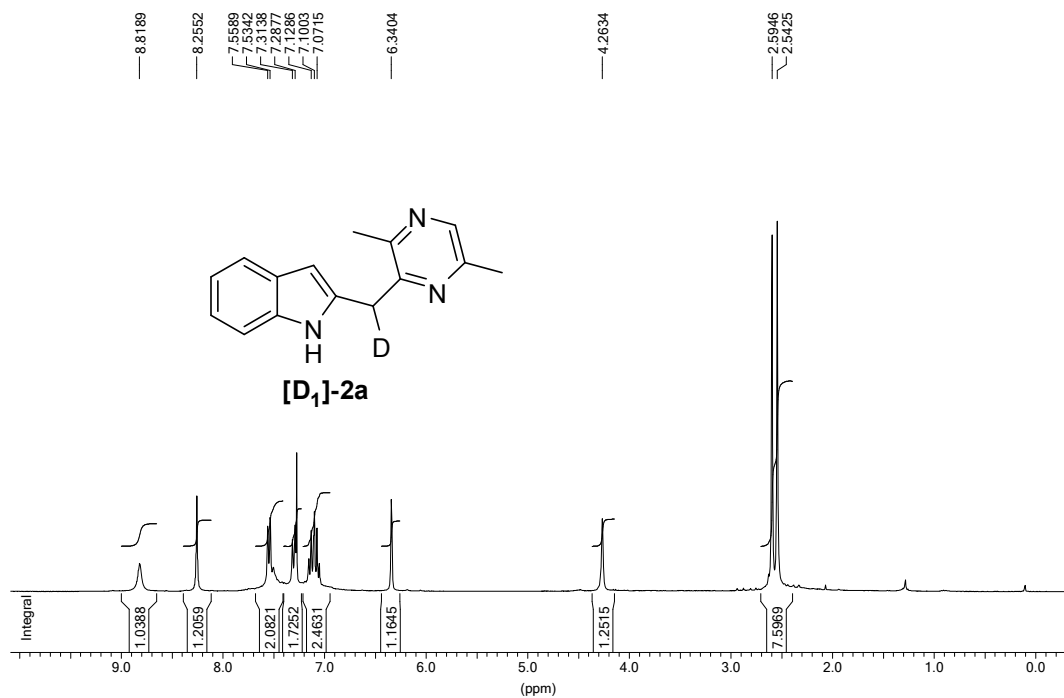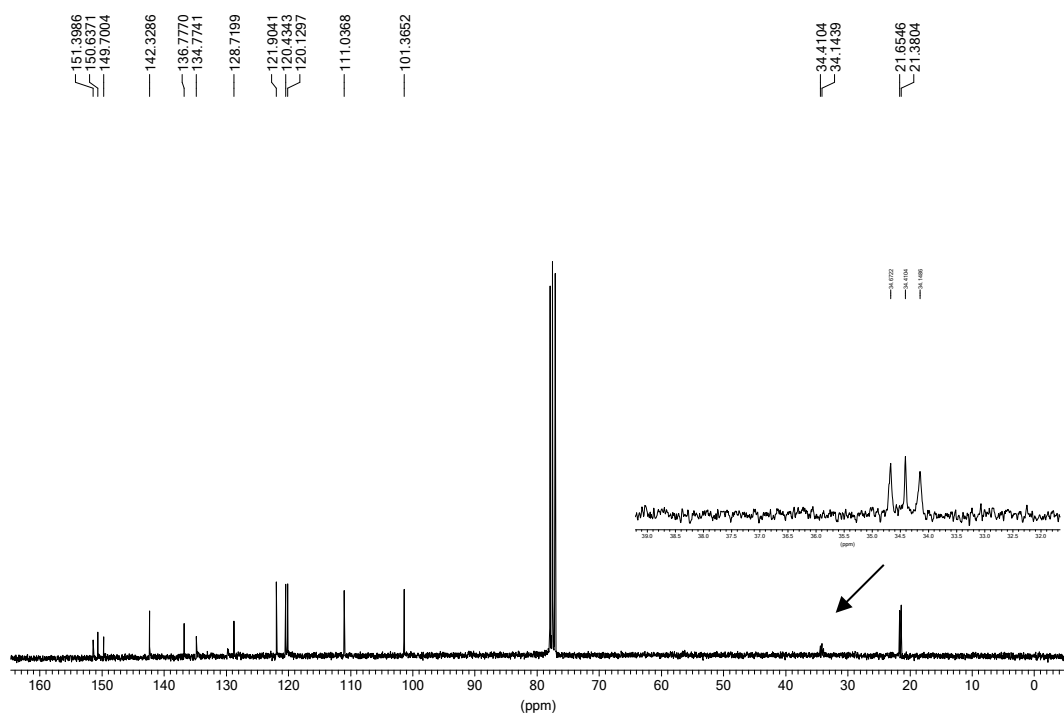

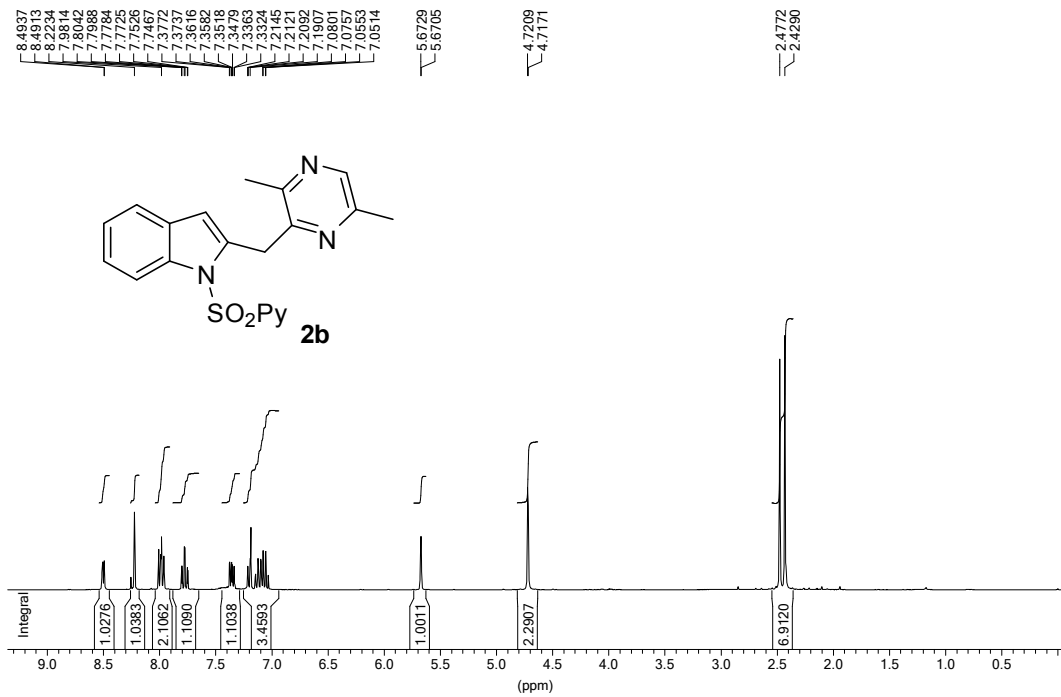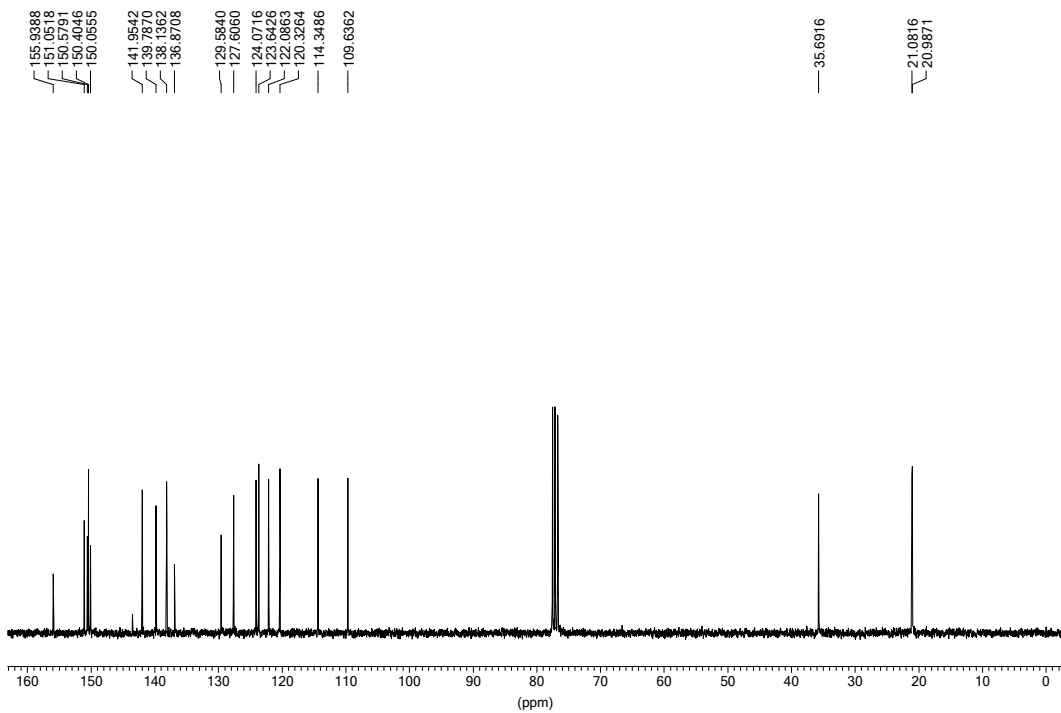

8.9231  
 8.1133  
 7.9864  
 7.7328  
 7.7296  
 7.4696  
 7.4672  
 7.4428  
 7.4399  
 7.1307  
 7.1044  
 7.0776  
 6.8060  
 6.7967

4.3494

2.5166  
 2.3218

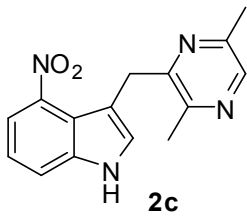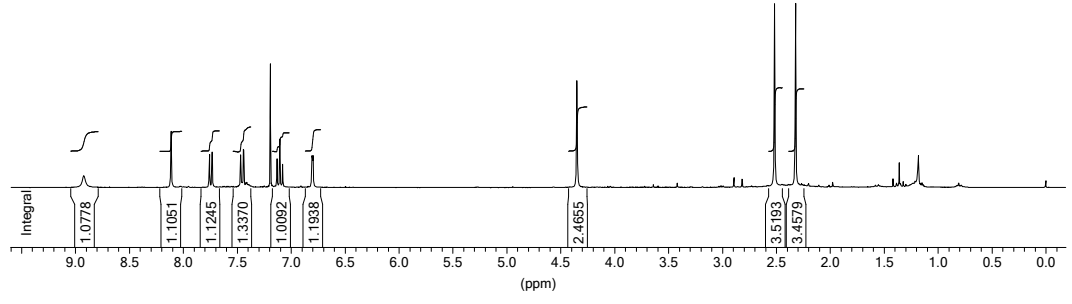

153.5680  
 150.3246  
 148.9210  
 143.6341  
 140.7033  
 139.1689  
 127.3951  
 120.8427  
 120.6927  
 117.5920  
 117.1775  
 112.1815

33.2627

21.1398  
 20.8344

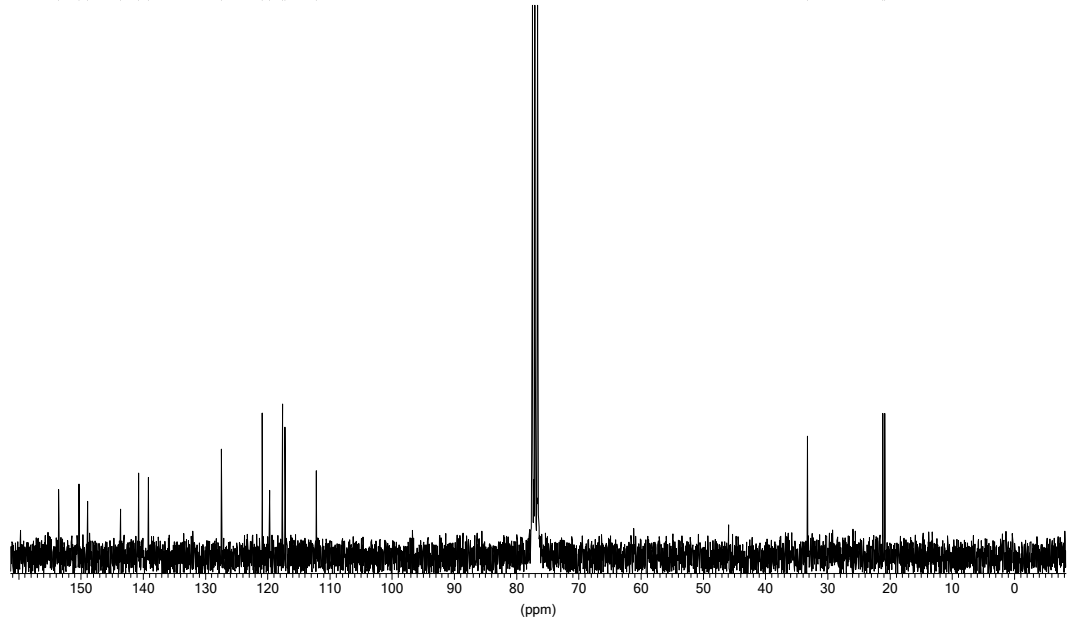

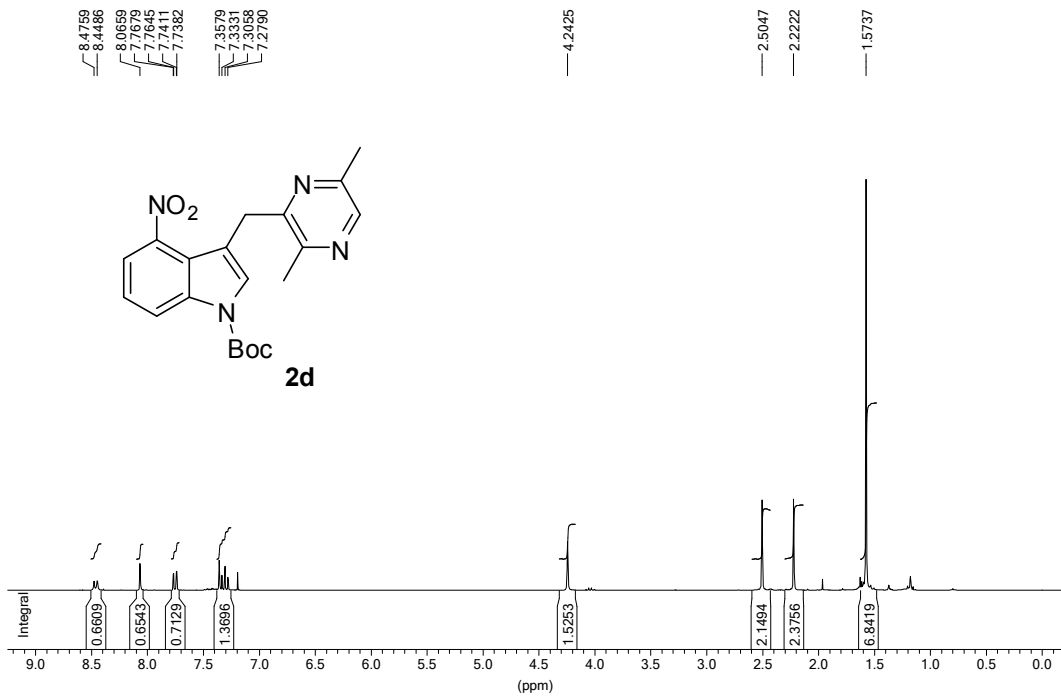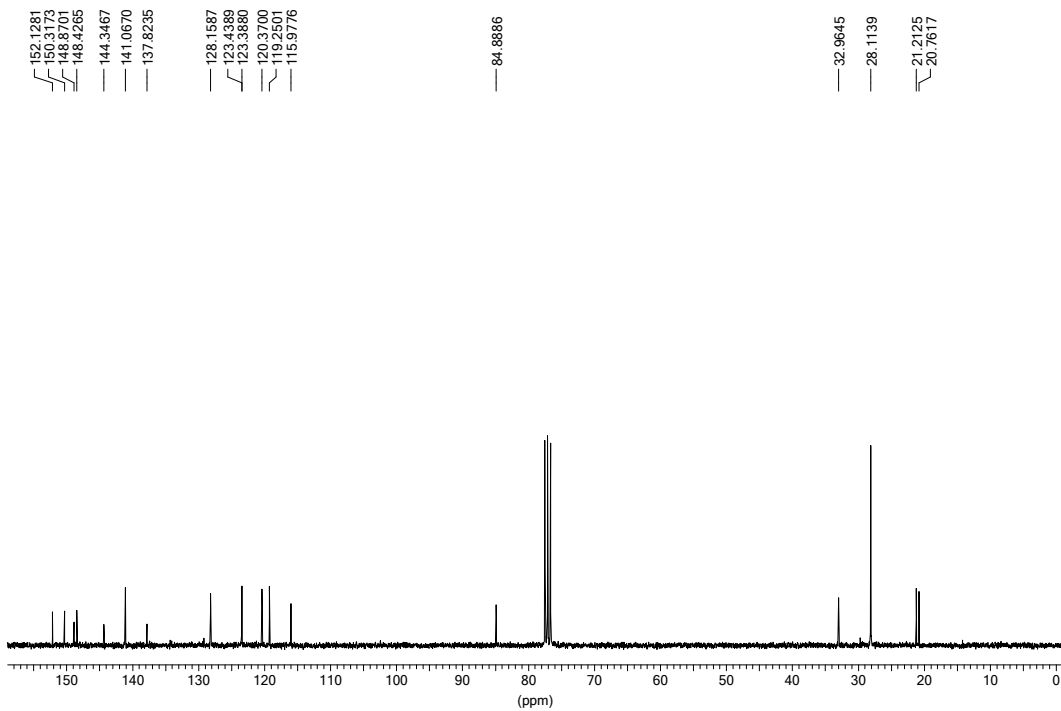



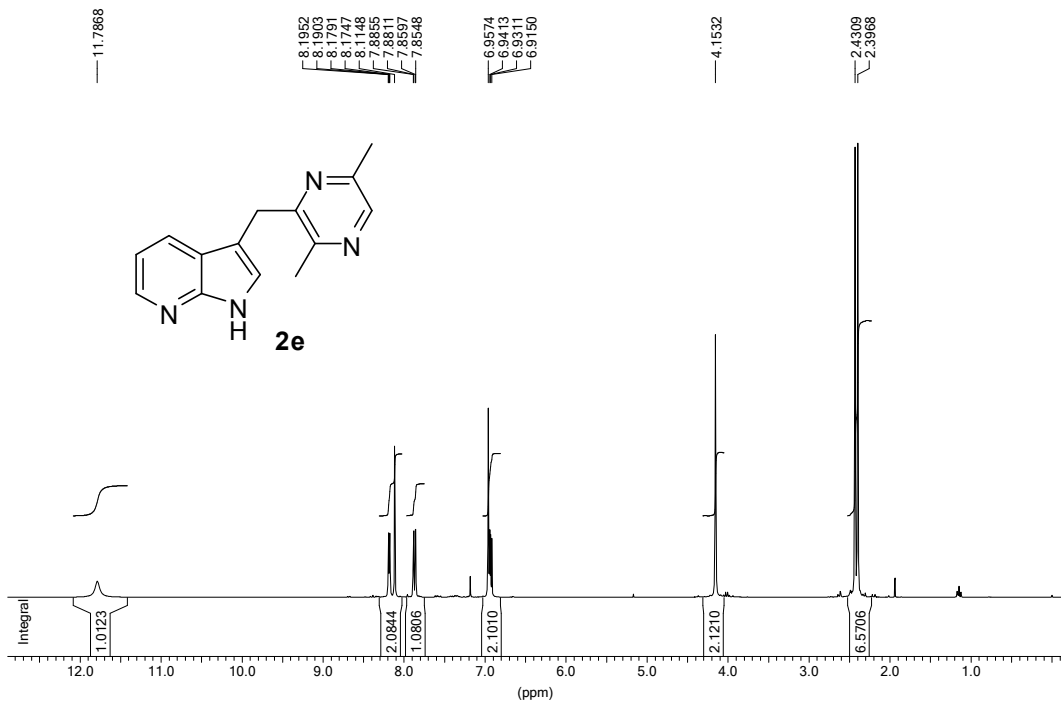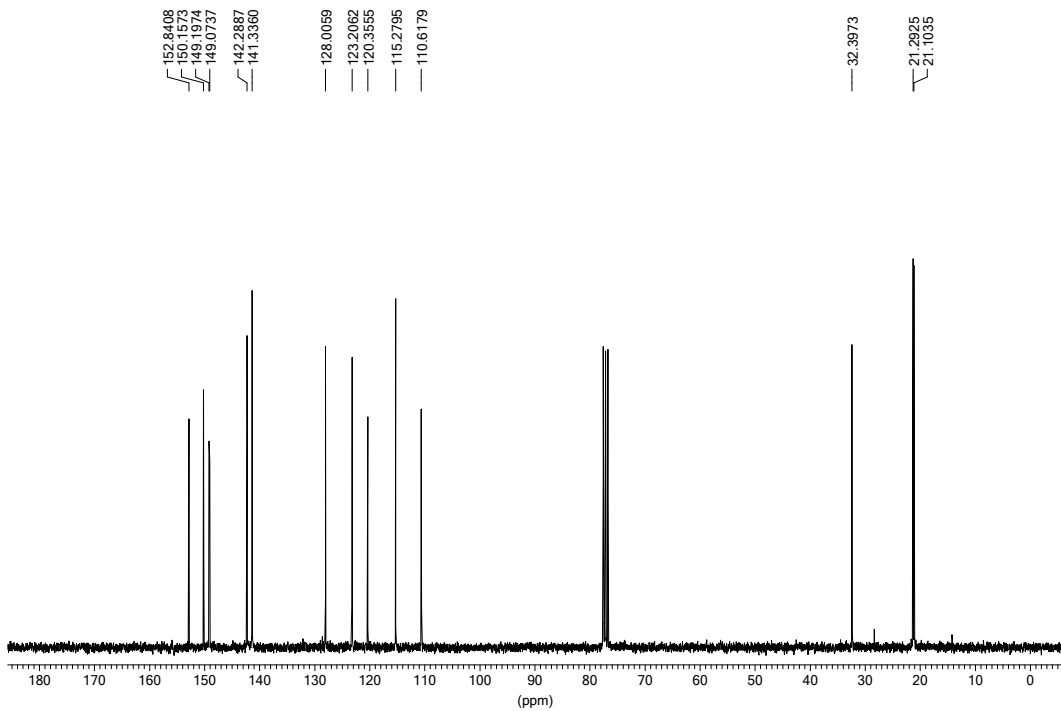

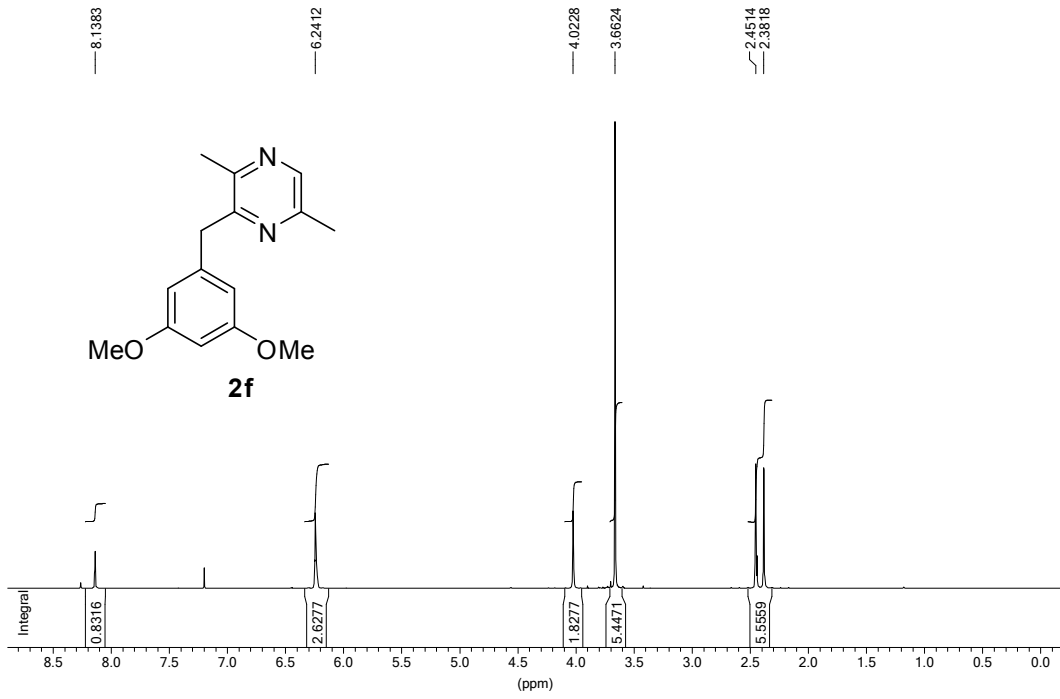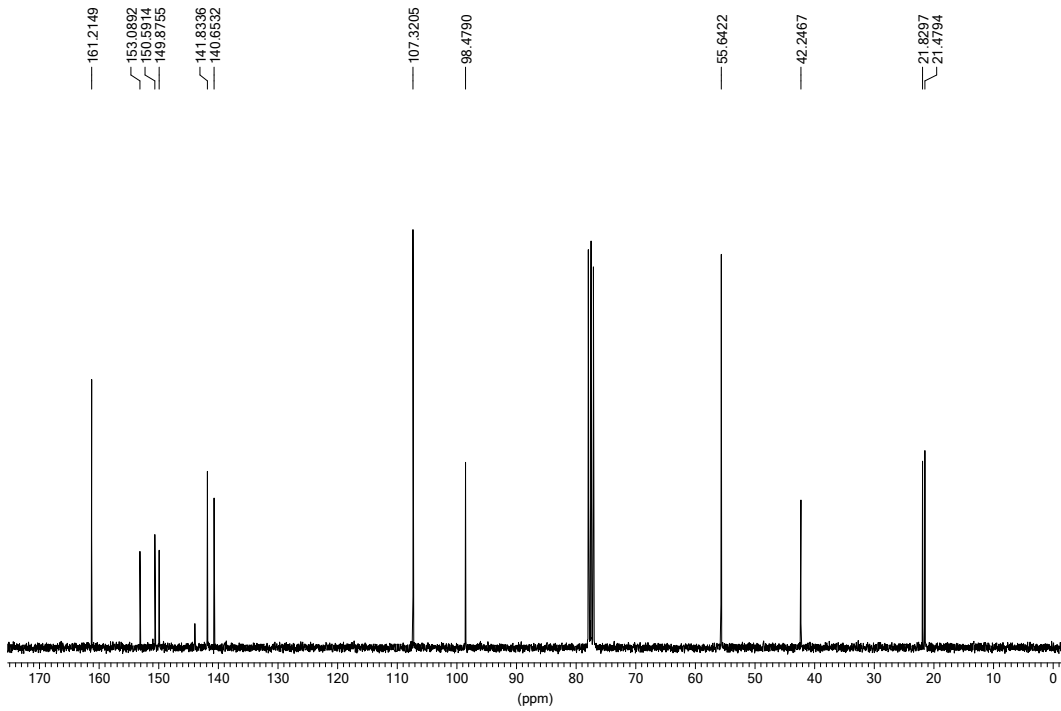

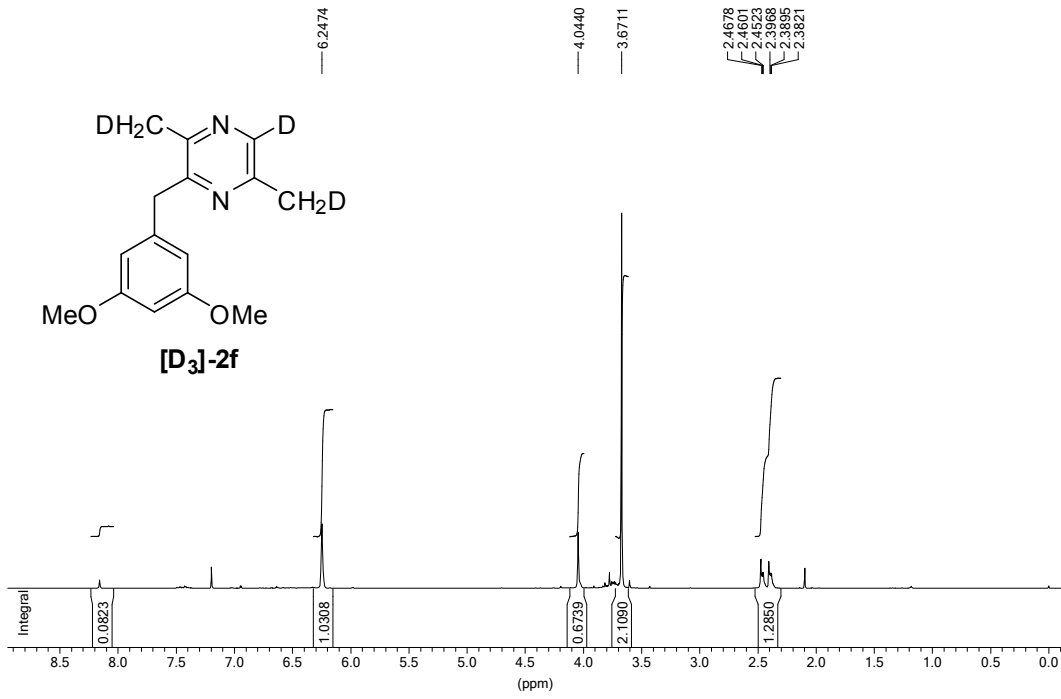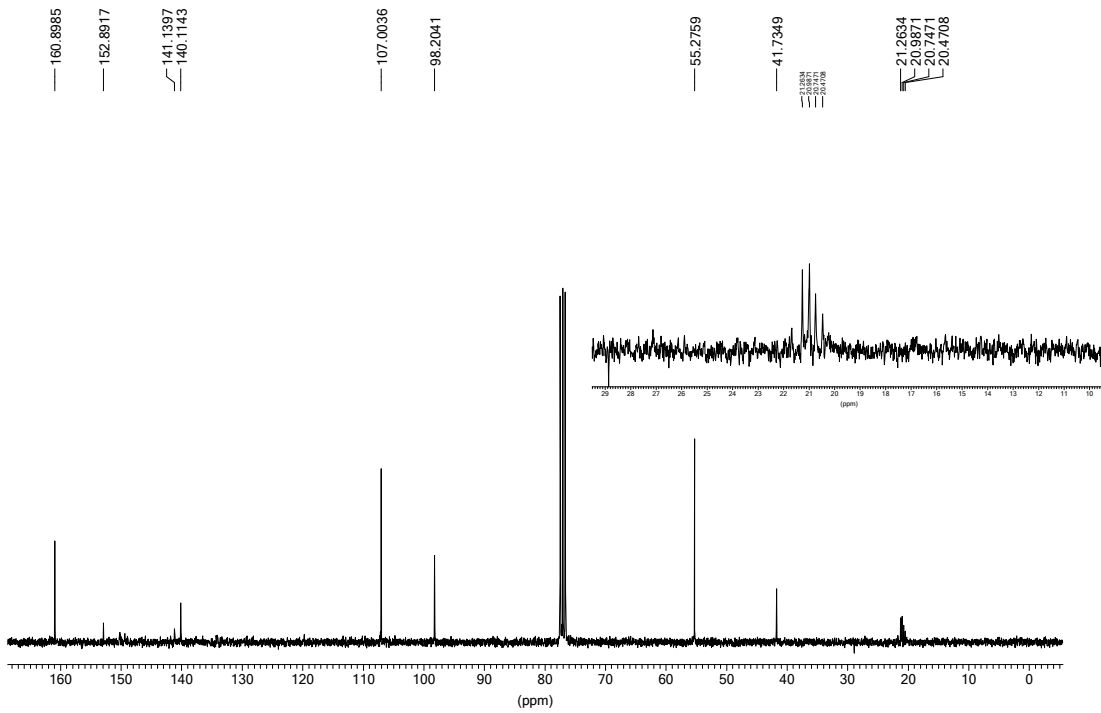

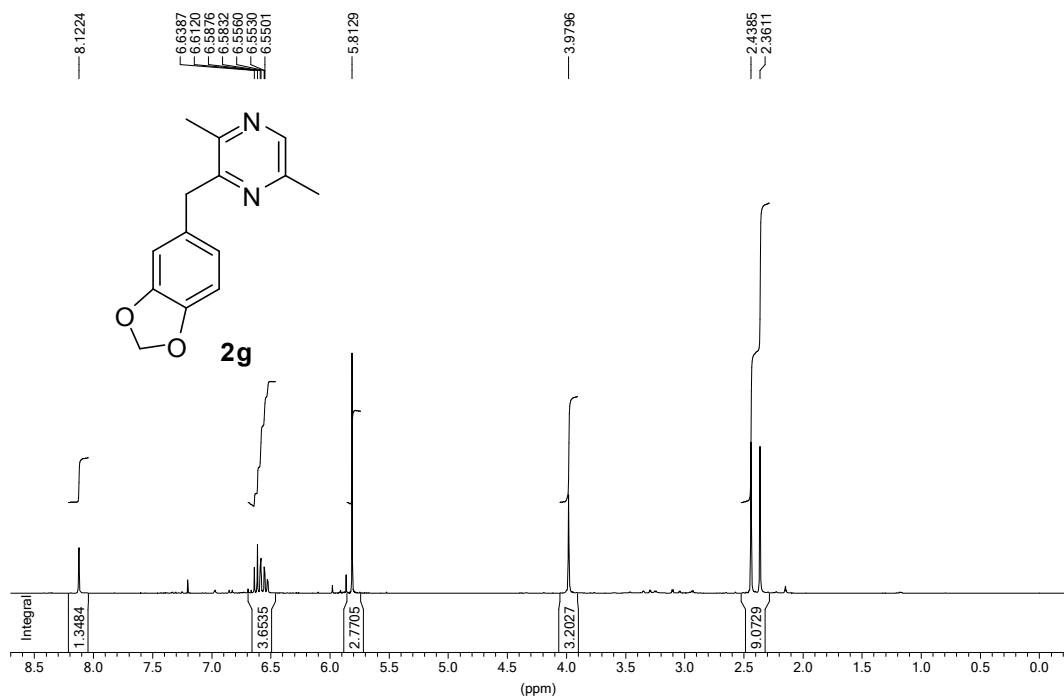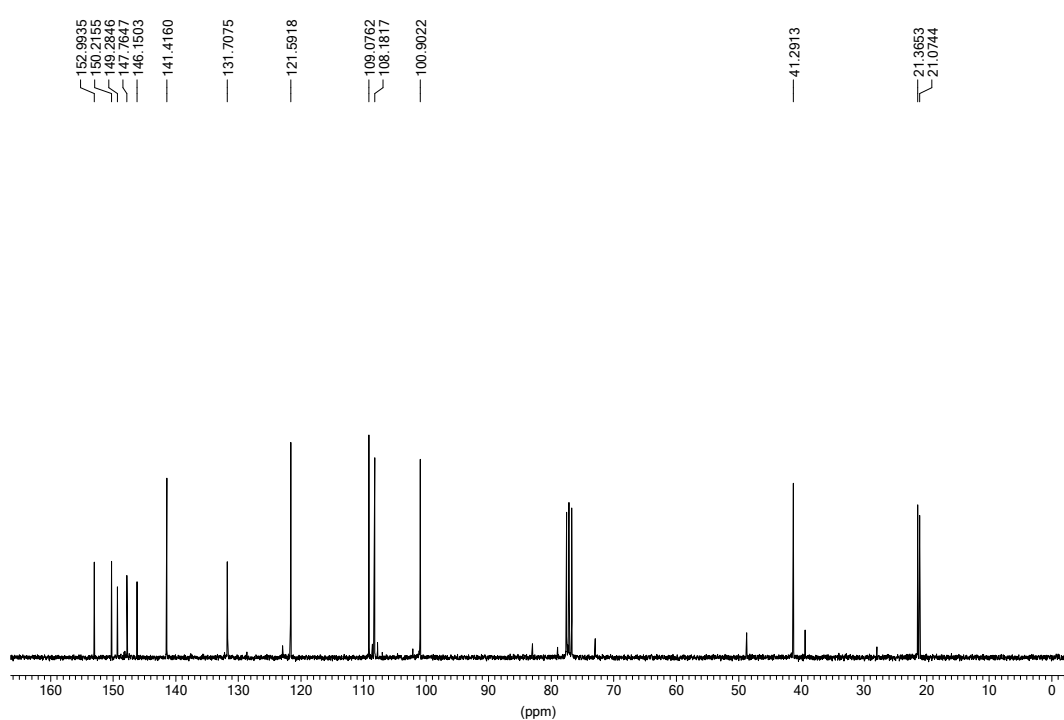

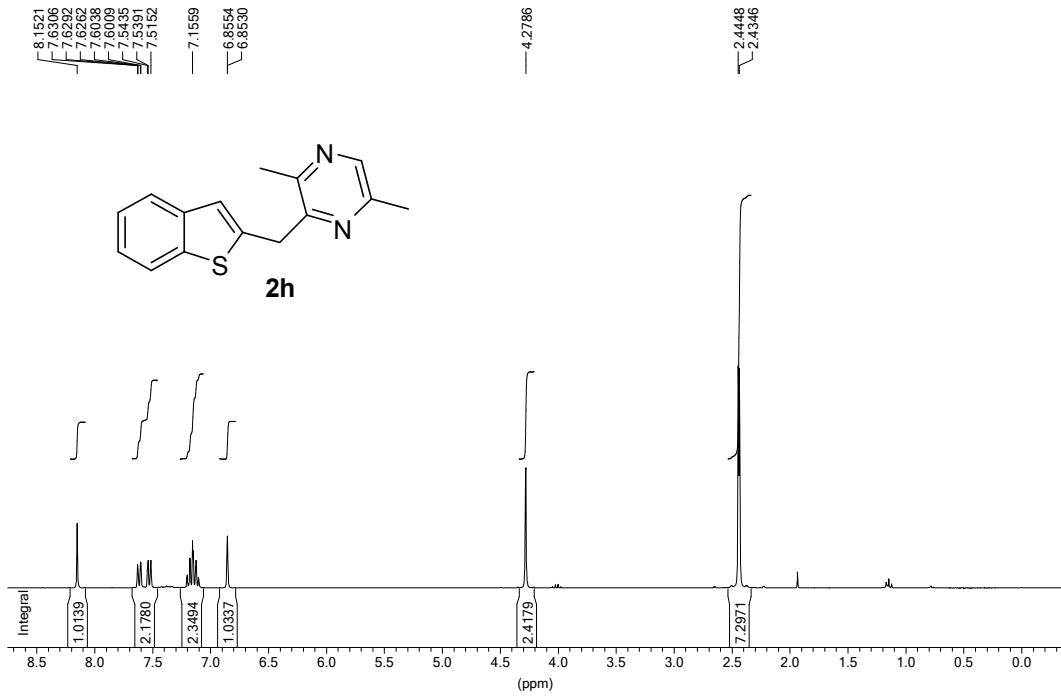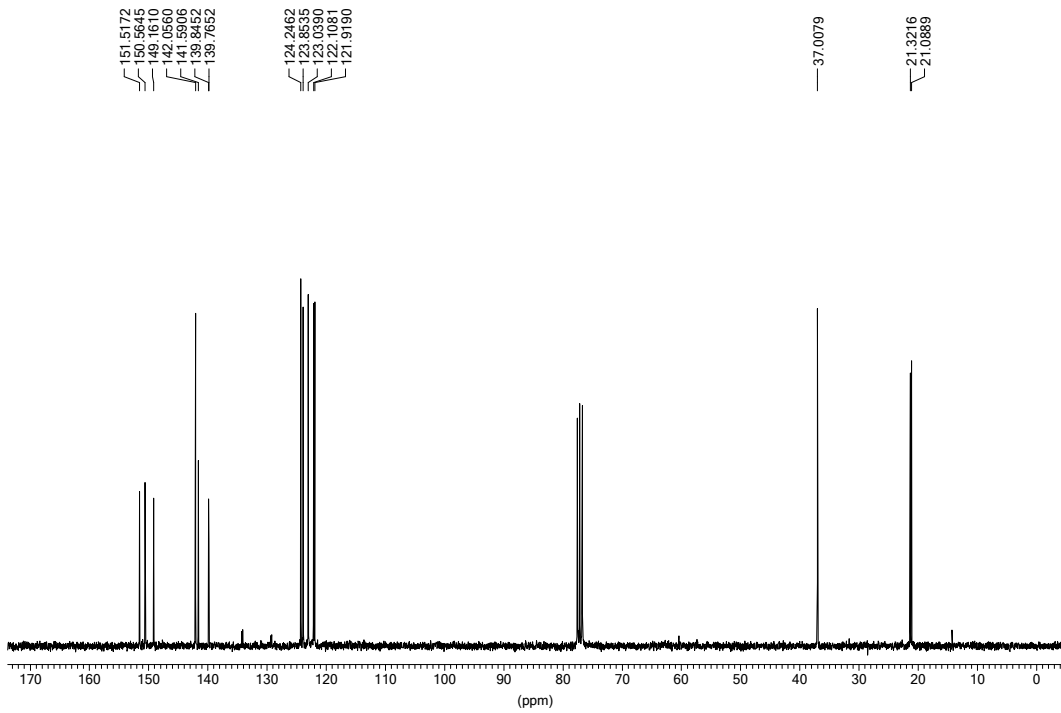

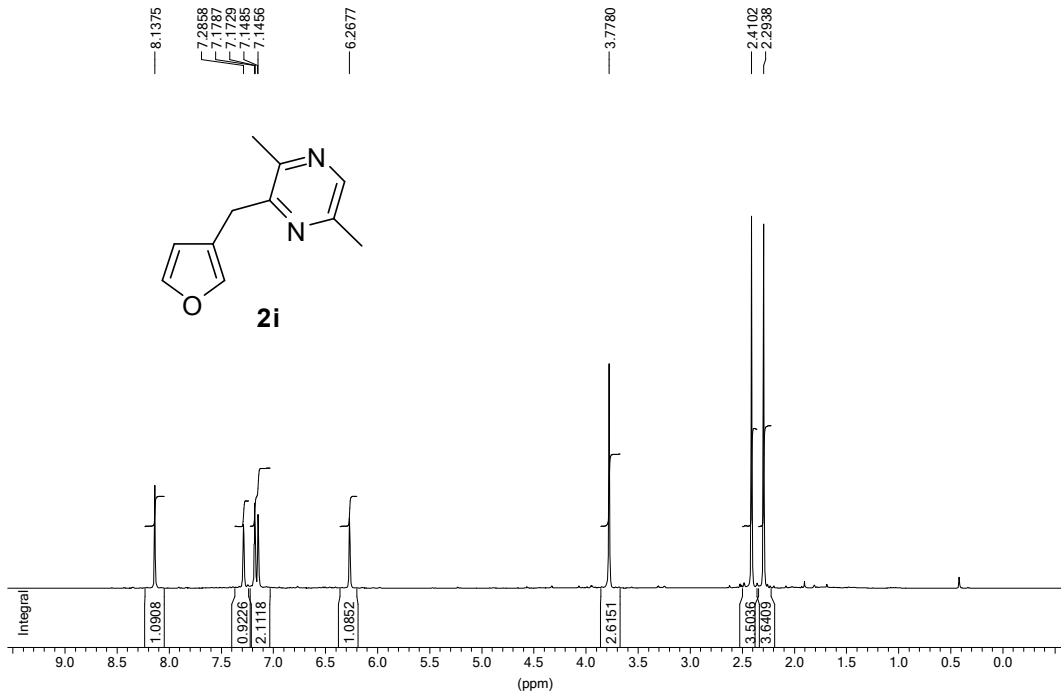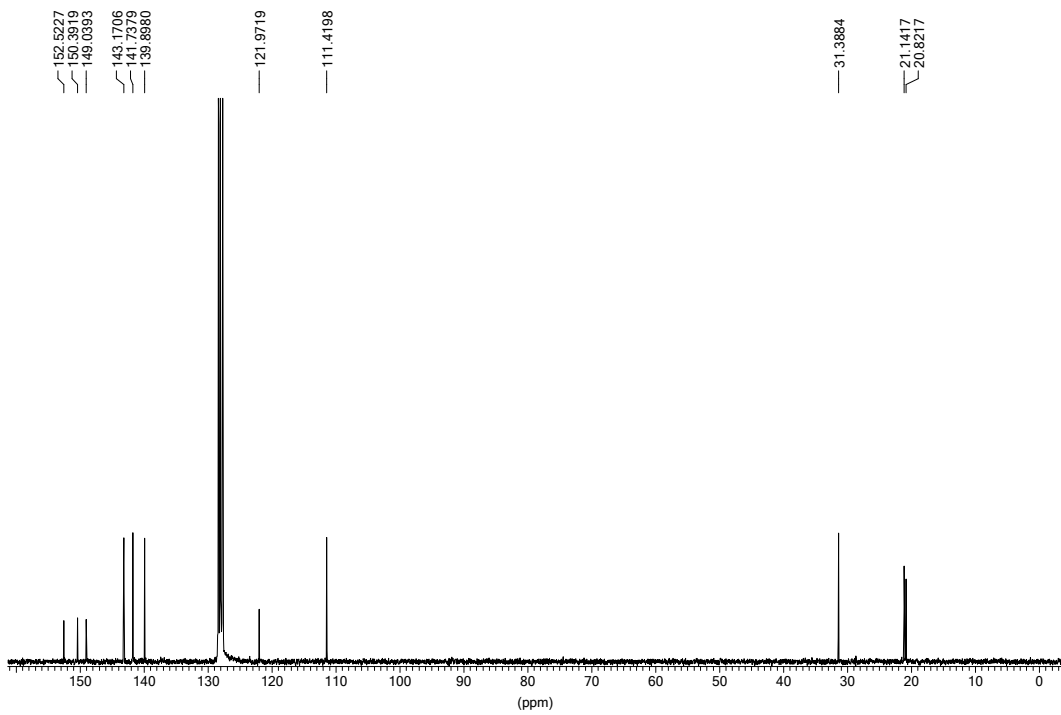

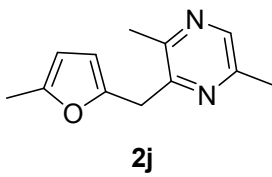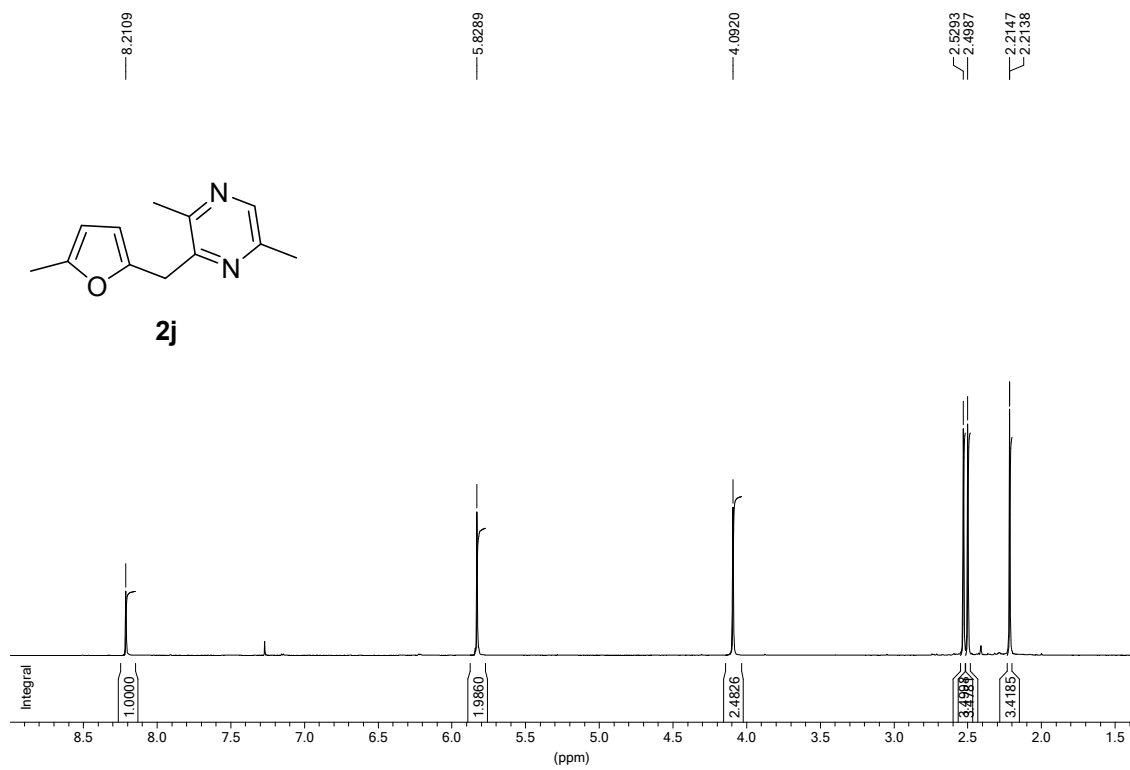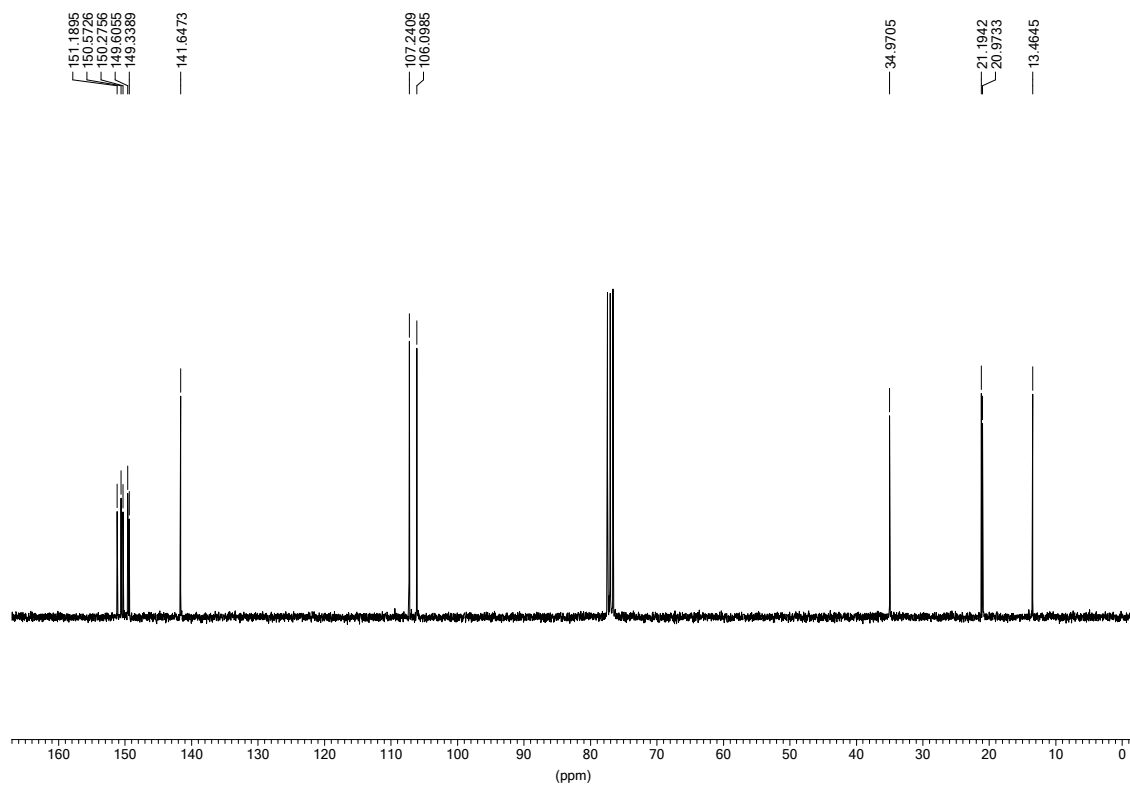

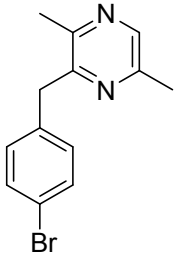

**2k**

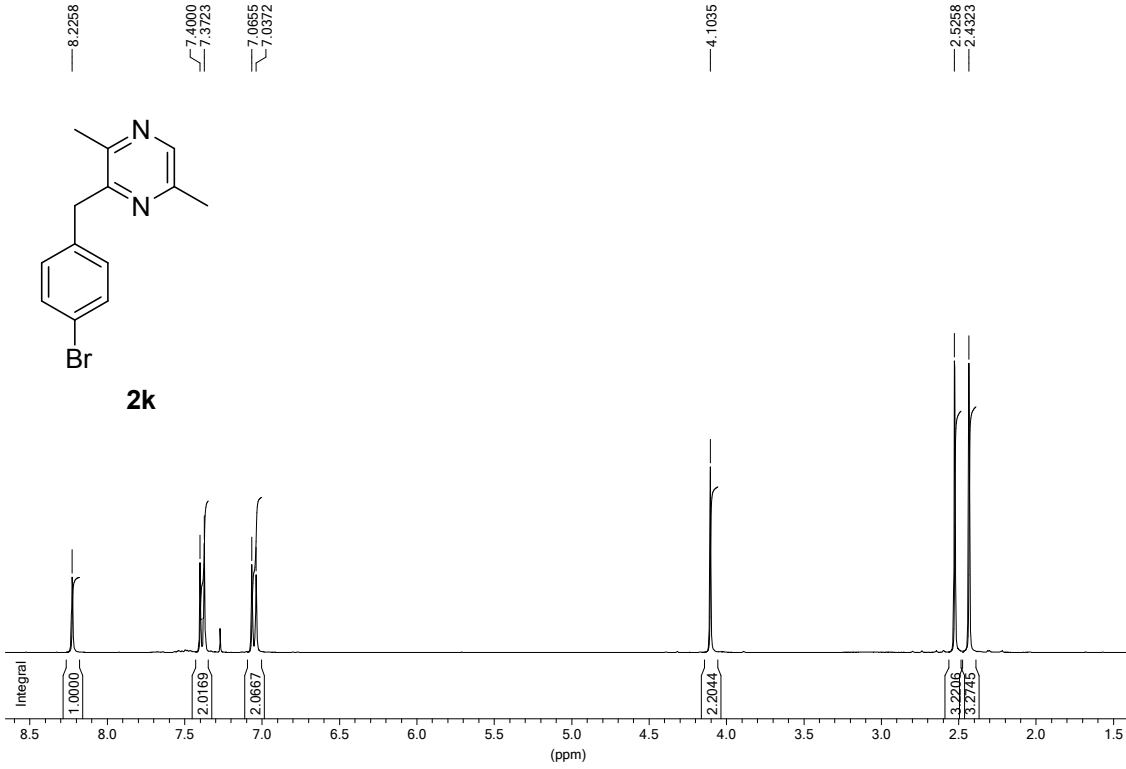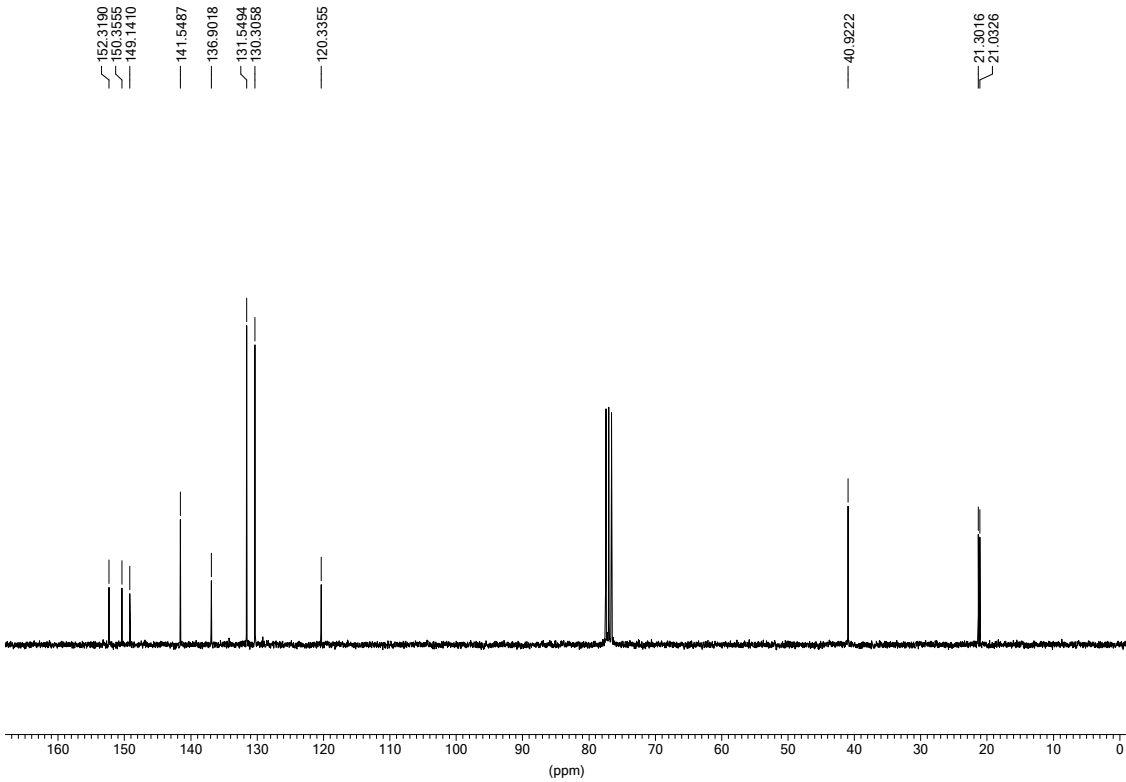



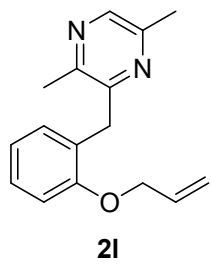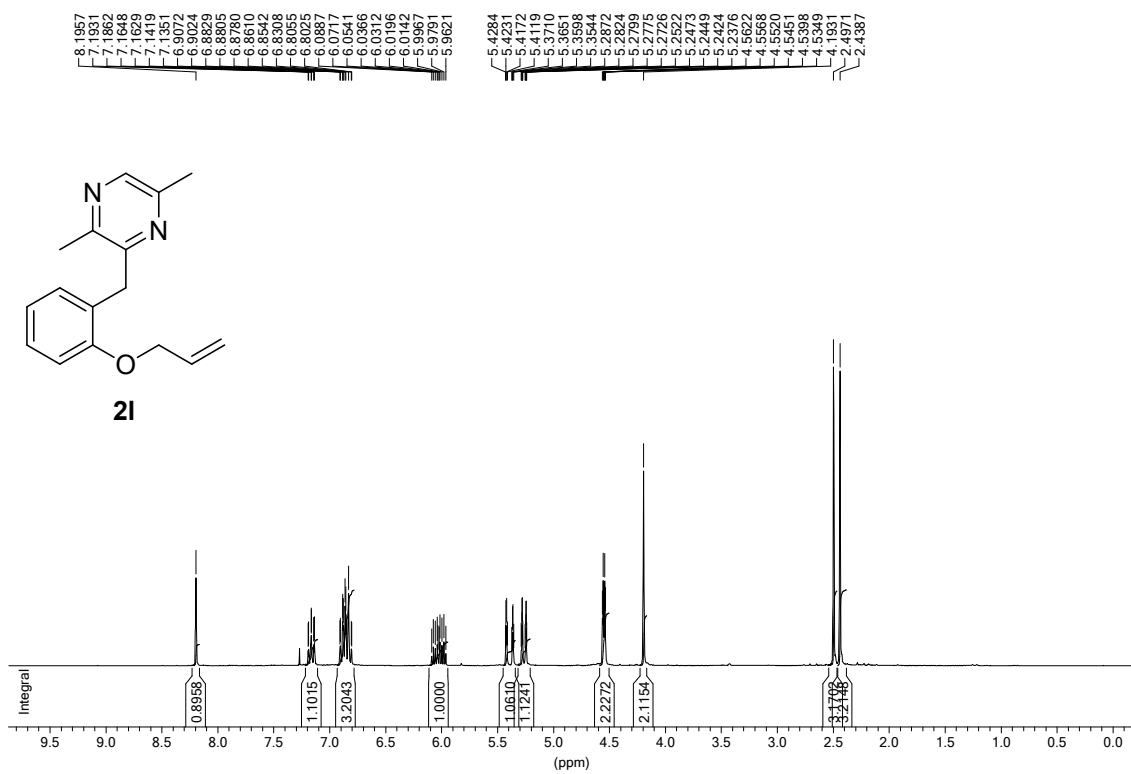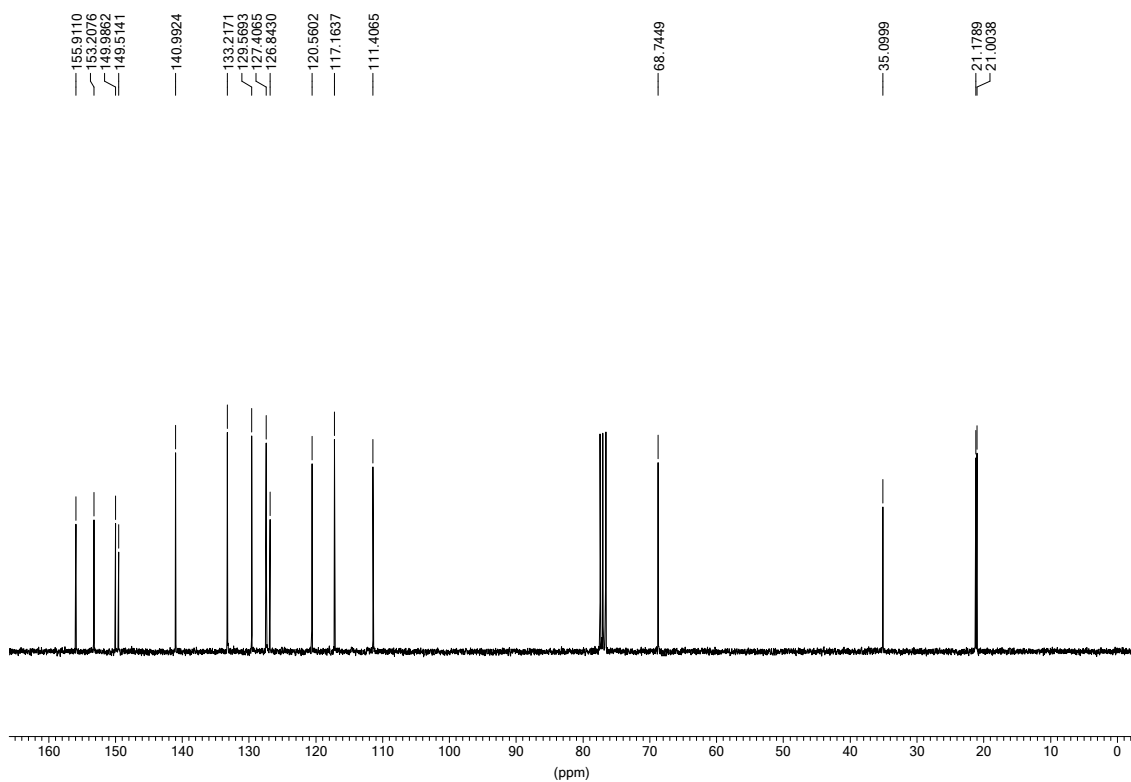

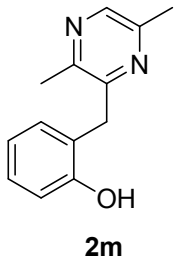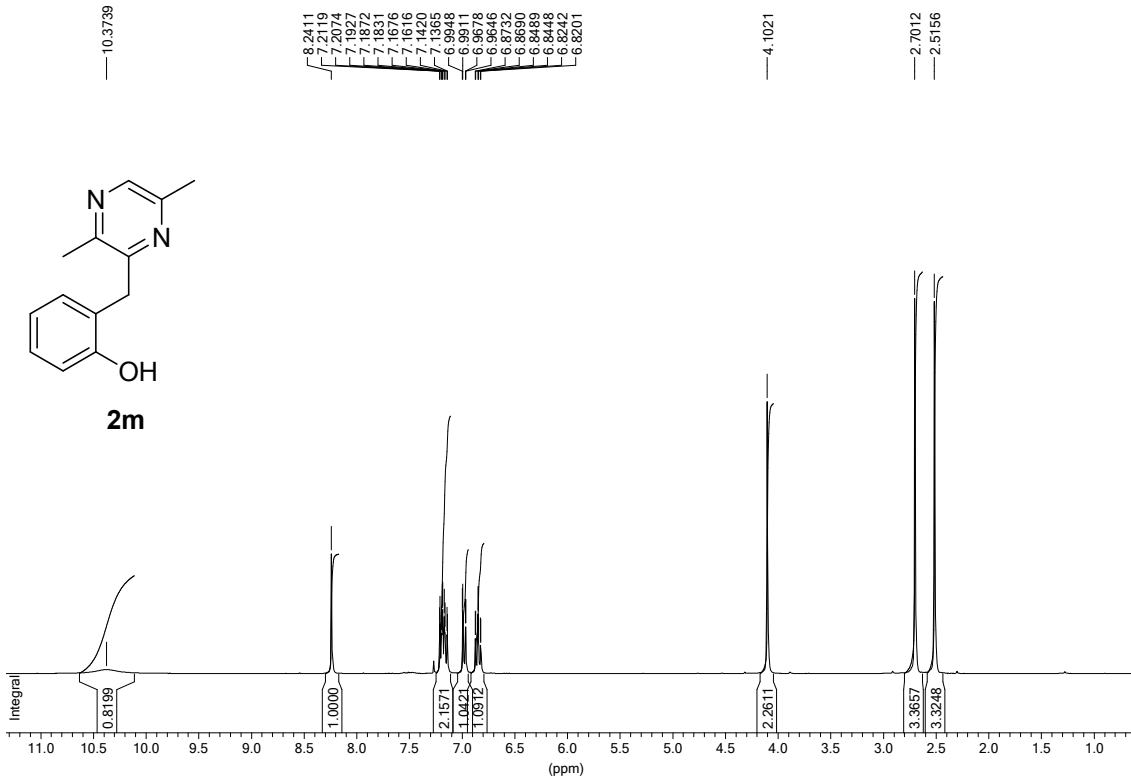

- 156.3984
- 152.5526
- 148.9125
- 148.5926
- 142.0205

- 130.2166
- 128.6783
- 124.2613
- 120.0652
- 118.1309

- 36.9505

- 21.2856
- 20.3641

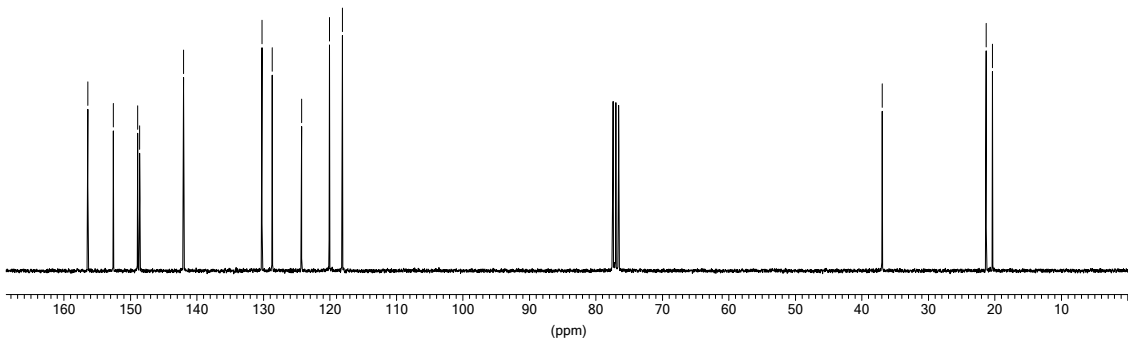

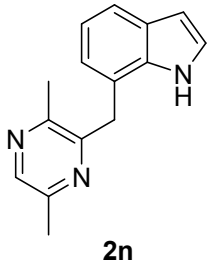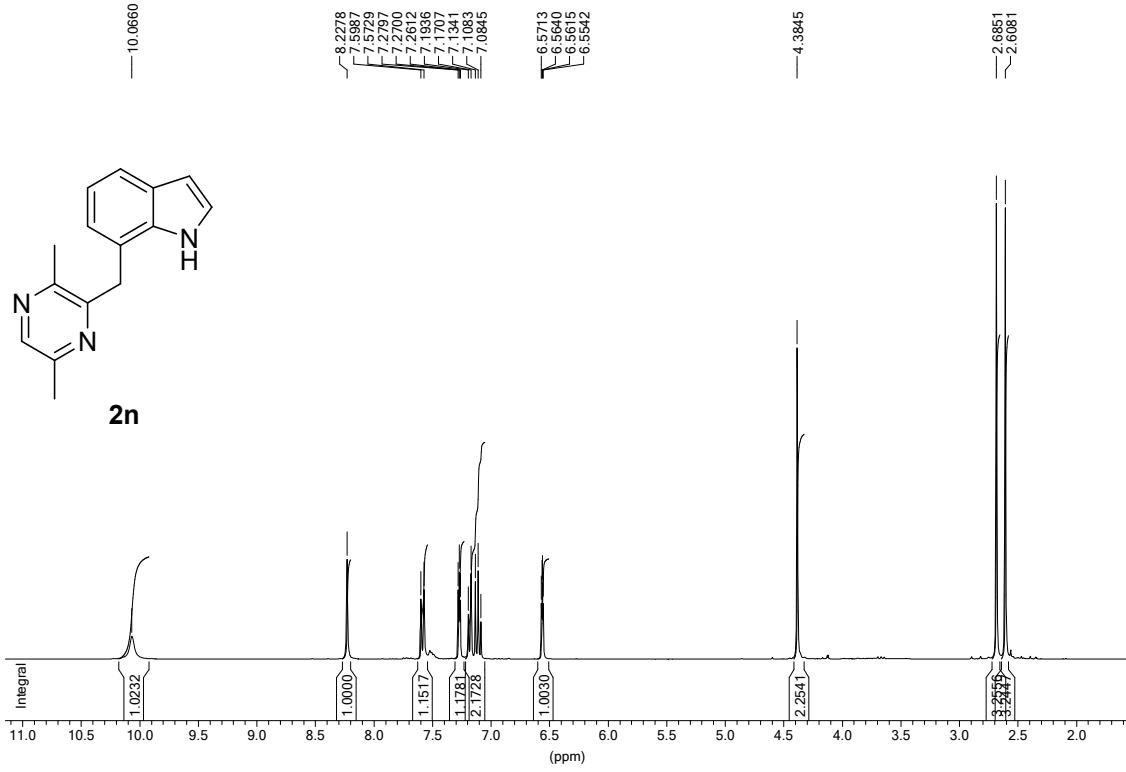

151.6921

149.8491

149.2399

141.4874

135.7530

128.1680

124.2918

122.3346

119.8596

119.7073

119.6855

102.4279

39.4483

21.4912

20.9657

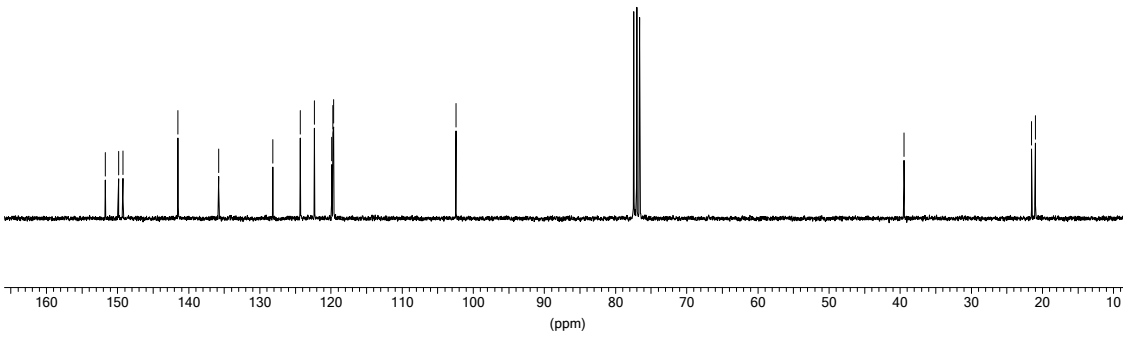

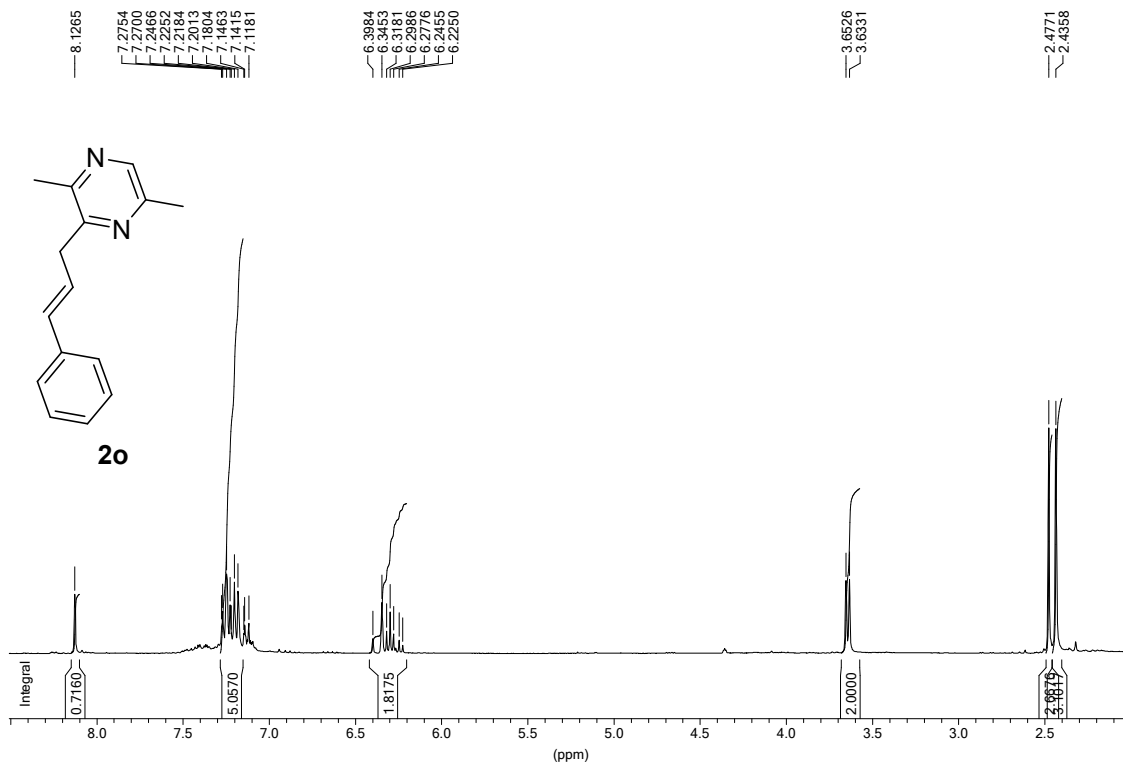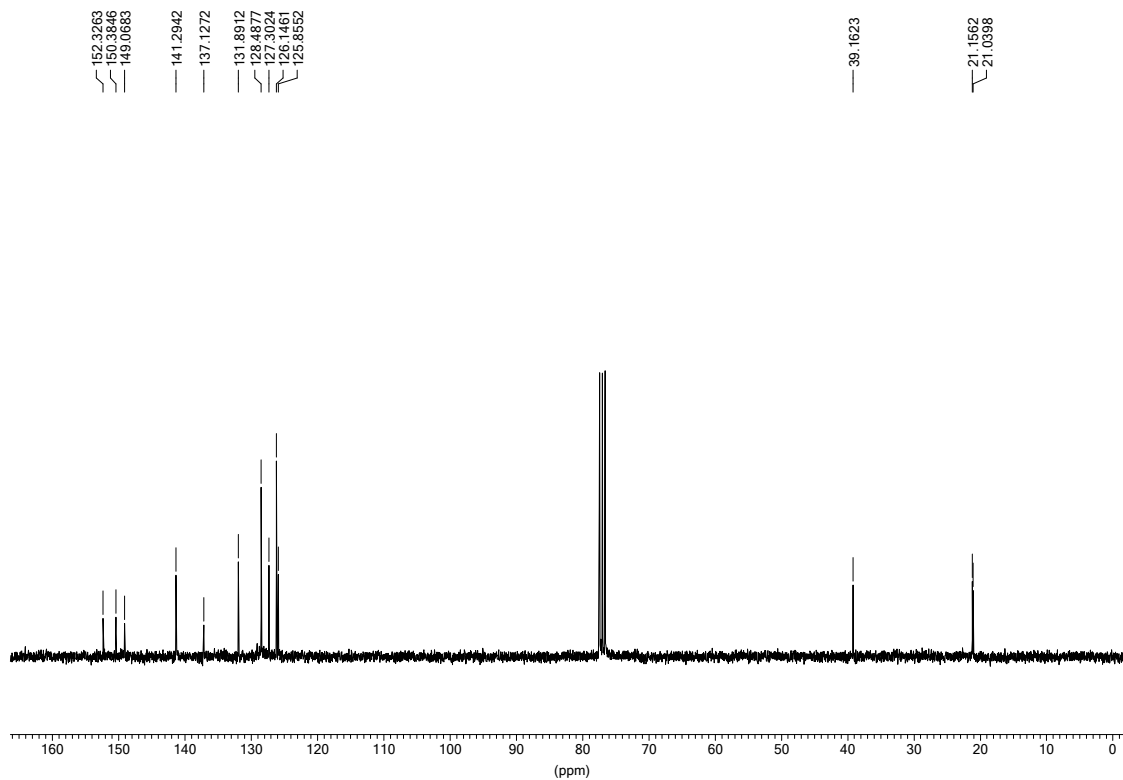

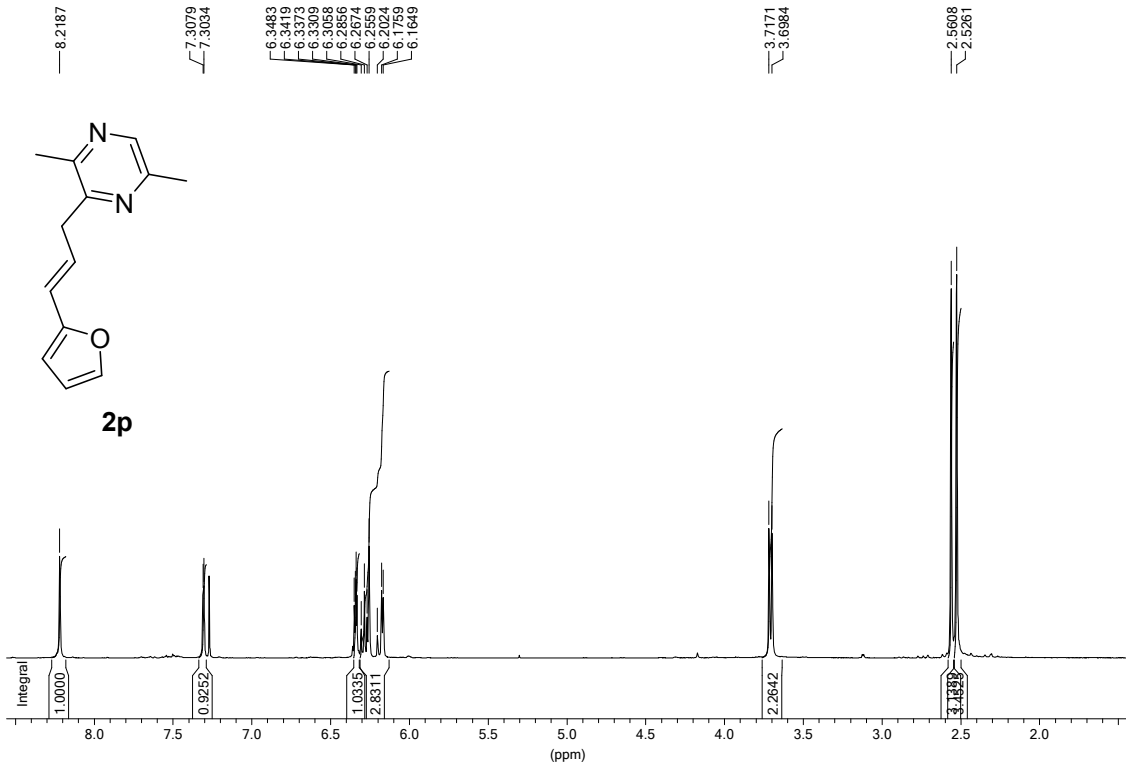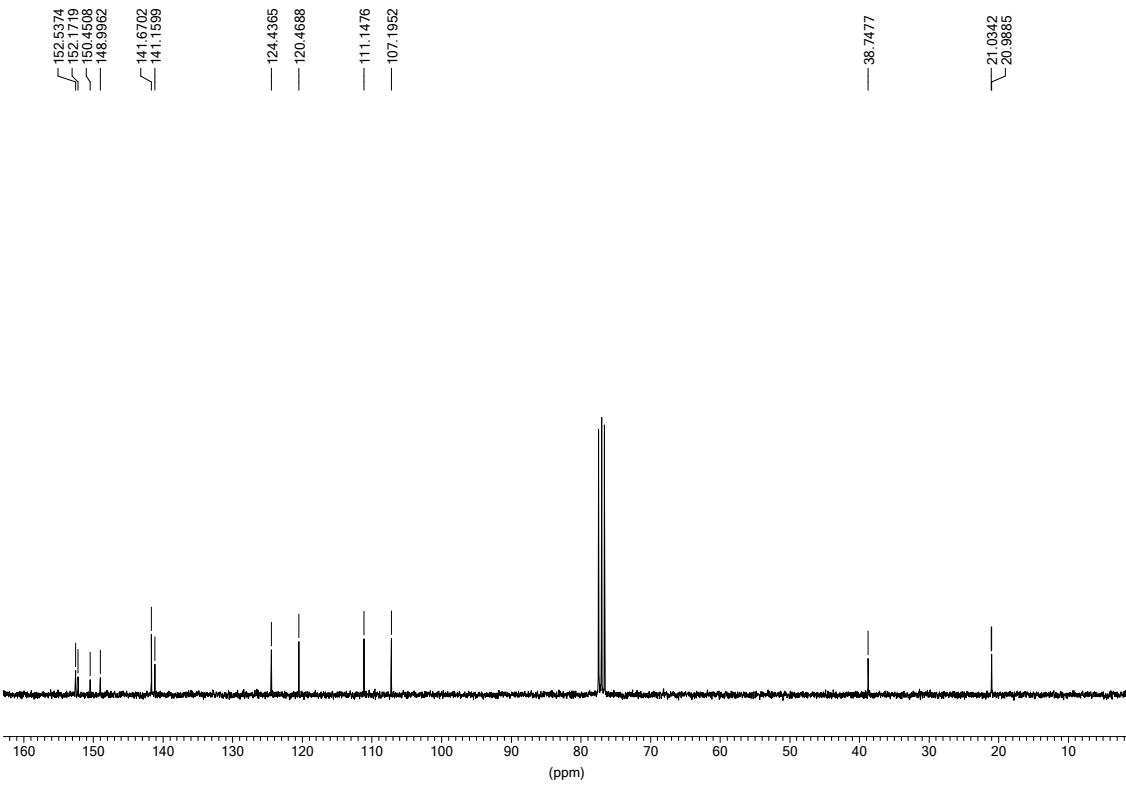

Supplement: c4cc01485e1.pdf [file c4cc01485e1.pdf]
